# Supplementary material for: Efficient access to β-amino acid ester/β-amino ketone derivatives via photocatalytic radical alkoxycabonylimidation/carbonylimidation of alkenes
Source: Royal Society of Chemistry journal article supplement (doi:10.1039/d2qo00268j), 2022-01-01
Supplement: d2qo00268j1.pdf [file d2qo00268j1.pdf]

**Efficient access to  $\beta$ -Amino Acid Ester/ $\beta$ -Amino Ketone  
Derivatives via Photocatalytic Radical Alkoxyacylation/  
Carbonylation of Alkenes**

Peng-Ju Xia\*, Fu Liu, Ying-Ming Pan, Meng-Ping Yang, Yun-Yi Yang

School of Chemistry and Pharmaceutical Sciences, State Key Laboratory for Chemistry and Molecular  
Engineering of Medicinal Resources, Guangxi Normal University

## General Experimental Informations

Unless otherwise noted, all the reagents were purchased from commercial suppliers and used without further purification.  $^1\text{H}$  NMR spectra were recorded at 400 or 600 MHz. The chemical shifts were recorded in ppm relative to tetramethylsilane and with the solvent resonance as the internal standard. Data were reported as follows: chemical shift, multiplicity (s = singlet, d = doublet, t = triplet, q = quartet, m = multiplet), coupling constants (Hz), integration.  $^{13}\text{C}$  NMR data were collected at 100 or 150 MHz with complete proton decoupling.  $^{19}\text{F}$  NMR data were collected at 375 or 576 MHz. The HRMS spectrum was measured by micromass QTOF<sub>2</sub> Quadrupole/Time of Flight Tandem mass spectrometer with electron spray ionization. Cyclic voltammograms were recorded on a CHI 660E potentiostat.

### General procedure for the preparation of alkenes<sup>a</sup>

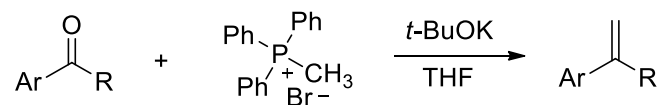

An oven-dried flask was charged with ketone (1.0 equiv.), menthyl triphenyl (1.2 equiv.) and THF (2.5 mL/mmol). Then *t*-BuOK (1.2 equiv.) was added to the mixture and stirred at room temperature for 3 hours. The residue was partitioned between ethyl acetate (50 mL) and saturated brine (50 mL). The organic layer was washed with water, dried over NaSO<sub>4</sub> and concentrated. The residue was purified by column chromatography to afford the corresponding alkene.

### General procedure for the preparation of trifluoromethyl alkenes<sup>b</sup>

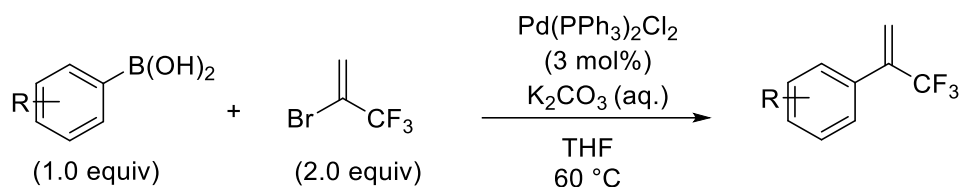

Trifluoromethyl alkenes were prepared according to reported synthetic procedures. (*Org. Lett.* **2017**, *19*, 946-949; *Angew. Chem. Int. Ed.*, **2020**, *59*, 6706-6710.). To a Schlenk tube equipped with stir bar, arylboronic acid (1.0 equiv., 10 mmol) and Pd(PPh<sub>3</sub>)<sub>2</sub>Cl<sub>2</sub> (3 mol%, 0.3 mmol, 210.6 mg) were added. The vessel was evacuated and filled with argon (three times), and then aqueous K<sub>2</sub>CO<sub>3</sub> (2.0 M, 20 mL) and THF (30 mL) were added. After addition of 2-bromo-3,3,3-trifluoropropene (2.0 equiv., 20 mmol, 2.1 mL), the solution was stirred at 60°C for 12 hours (TLC tracking detection). The solvent was removed under reduced pressure and the residue was purified by column chromatography to afford the corresponding trifluoromethyl alkene (PE - PE/EA=100:1).

### General procedure for the preparation of β--CF<sub>3</sub>-1,3-Enynes<sup>c</sup>

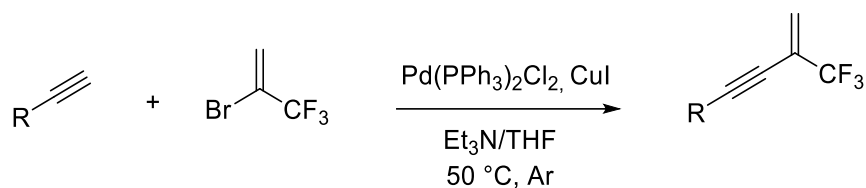

To an oven dried Schlenk flask equipped with a magnetic stir bar was successively added  $\text{PdCl}_2(\text{PPh}_3)_2$  (0.01 equiv.) and  $\text{CuI}$  (0.02 equiv.). The system was purged with argon. Dry THF (50 mL) was then added followed by  $\text{Et}_3\text{N}$  (5 mL), alkyne (5 mmol, 1 equiv.), 2-bromo-3,3,3-trifluoroprop-1-ene (6 mmol, 1.2 equiv.) via syringe. The reaction mixture was stirred at 50 °C for 12 h. The reaction was then cooled to room temperature, quenched with saturated  $\text{NH}_4\text{Cl}$  solution and extracted with  $\text{EtOAc}$ . Combined extracts were dried over  $\text{Na}_2\text{SO}_4$ . After evaporation under vacuum, the residue was purified by flash chromatography over silica gel to give the desired  $\text{CF}_3$ -substituted 1,3-enyne.

### General procedure for the preparation of oxime oxalate 2a and 2b

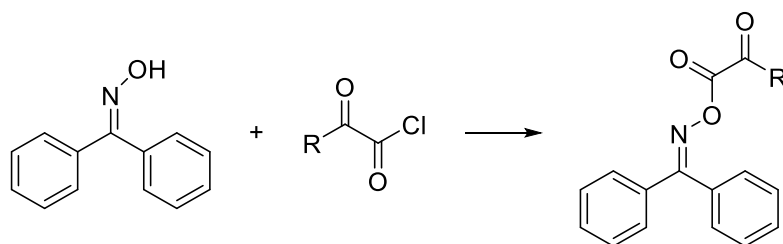

To a stirred solution of oxime (20 mmol, 1.0 equiv.) and pyridine (30 mmol, 1.5 equiv.) in anhydrous THF (1 M) at 0 °C was dropwise added corresponding Oxalyl chloride (30 mmol, 1.5 equiv.). The reaction was stirred for another 1 h at room temperature. After that, the reaction mixture was diluted with  $\text{EtOAc}$  and washed brine. The organic layers were dried with anhydrous  $\text{Na}_2\text{SO}_4$  and concentrated in vacuo. The residue was purified by chromatography on silica gel to afford the corresponding oxime carbonate (79%-86%).

## Procedure for the preparation of compounds 3 and 4

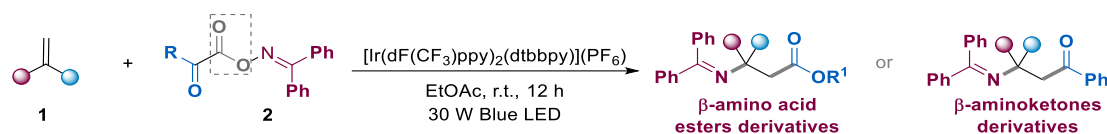

To a 15 mL Schlenk flask equipped with a magnetic stirring bar, **1** (0.2 mmol, 1.0 equiv.), **2** (0.3 mmol, 1.5 equiv.),  $[\text{Ir}(\text{dF}(\text{CF}_3)\text{ppy})_2(\text{dtbbpy})](\text{PF}_6)$  (1 mmol %) and EtOAc (4 mL) were added. The vessel was evacuated and backfilled with Ar three times. The tube was screw-capped and stirred at room temperature under irradiation of 30 W blue LED (distance app. 3 cm) for 12 h. The solvent was removed under reduced pressure, and then the residue was purified by flash column chromatography (PE-PE/EtOAc = 1:9 to 1:4) to afford the desired product **3** or **4**.

## Optimization of reaction conditions

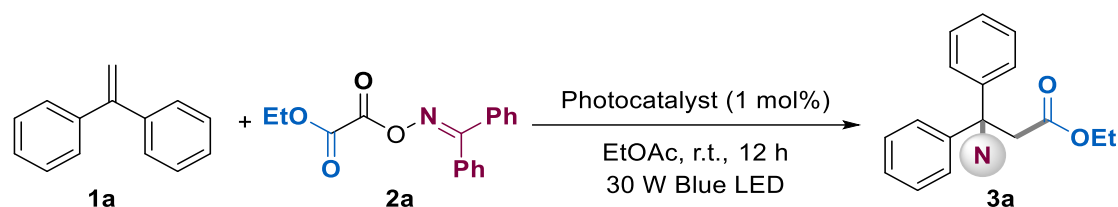

| Entry           | Photocatalyst                                                         | Solvent | Ratio (1a:2a) | Yield (%) |
|-----------------|-----------------------------------------------------------------------|---------|---------------|-----------|
| 1               | [Mes-Acr](ClO <sub>4</sub> )                                          | EtOAc   | 1:1.2         | 0         |
| 2               | [Ru(bpy) <sub>3</sub> ](PF <sub>6</sub> ) <sub>2</sub>                | EtOAc   | 1:1.2         | 0         |
| 3               | <i>fac</i> -[Ir(ppy) <sub>3</sub> ]                                   | EtOAc   | 1:1.2         | 0         |
| 4               | [Ir(ppy) <sub>2</sub> (dtbbpy)](PF <sub>6</sub> )                     | EtOAc   | 1:1.2         | trace     |
| 5               | [Ir(dF(CF <sub>3</sub> )ppy) <sub>2</sub> (dtbbpy)](PF <sub>6</sub> ) | EtOAc   | 1:1.2         | 62        |
| 6               | Thioxanthone                                                          | EtOAc   | 1:1.2         | trace     |
| 7               | Eosin Y                                                               | EtOAc   | 1:1.2         | 0         |
| 8               | [Ir(dF(CF <sub>3</sub> )ppy) <sub>2</sub> (dtbbpy)](PF <sub>6</sub> ) | THF     | 1:1.2         | 28        |
| 9               | [Ir(dF(CF <sub>3</sub> )ppy) <sub>2</sub> (dtbbpy)](PF <sub>6</sub> ) | PhMe    | 1:1.2         | 44        |
| 10              | [Ir(dF(CF <sub>3</sub> )ppy) <sub>2</sub> (dtbbpy)](PF <sub>6</sub> ) | MeCN    | 1:1.2         | trace     |
| 11              | [Ir(dF(CF <sub>3</sub> )ppy) <sub>2</sub> (dtbbpy)](PF <sub>6</sub> ) | DMF     | 1:1.2         | 41        |
| 12              | [Ir(dF(CF <sub>3</sub> )ppy) <sub>2</sub> (dtbbpy)](PF <sub>6</sub> ) | EtOAc   | 1:1.5         | 71        |
| 13              | [Ir(dF(CF <sub>3</sub> )ppy) <sub>2</sub> (dtbbpy)](PF <sub>6</sub> ) | EtOAc   | 1:1.5         | 76        |
| 14              | –                                                                     | EtOAc   | 1:1.5         | 0         |
| 15 <sup>c</sup> | [Ir(dF(CF <sub>3</sub> )ppy) <sub>2</sub> (dtbbpy)](PF <sub>6</sub> ) | EtOAc   | 1:1.5         | 0         |

[a] Reaction conditions: **1a** (0.2 mmol, 1.0 equiv.), **2a** (0.24 mmol, 1.2 equiv.), cat (1 mmol%), solvent (2 mL), 30 W blue LED (450 nm), 12 hours, argon atmosphere, rt. [b] EtOAc (4 mL). [c] Without LED.

### Time Profile of the Transformation with the Light ON/OFF over Time<sup>d</sup>

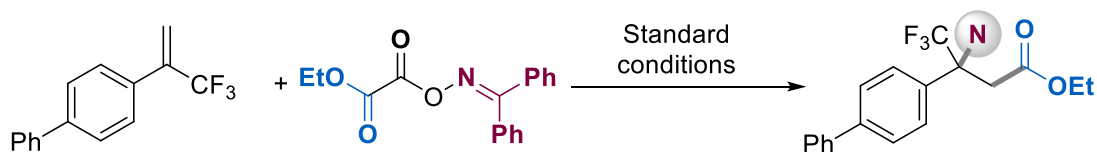

Standard reactions were set up parallel on a 0.40 mmol scale according to the stand condition with PhCF<sub>3</sub> (0.4 mmol) as an internal standard. After being irradiated for 2 h, an aliquot (200  $\mu$ L) from the reaction mixture was transferred into a nuclear magnetic tube charged with 0.5 mL of CDCl<sub>3</sub>-d<sub>1</sub>. The yield of product **3t** was determined by <sup>19</sup>F NMR. Then the reaction mixture was stirred for 2 h with light-off. All of the following yields were analyzed in the identical way after a 2 hour light on or off.

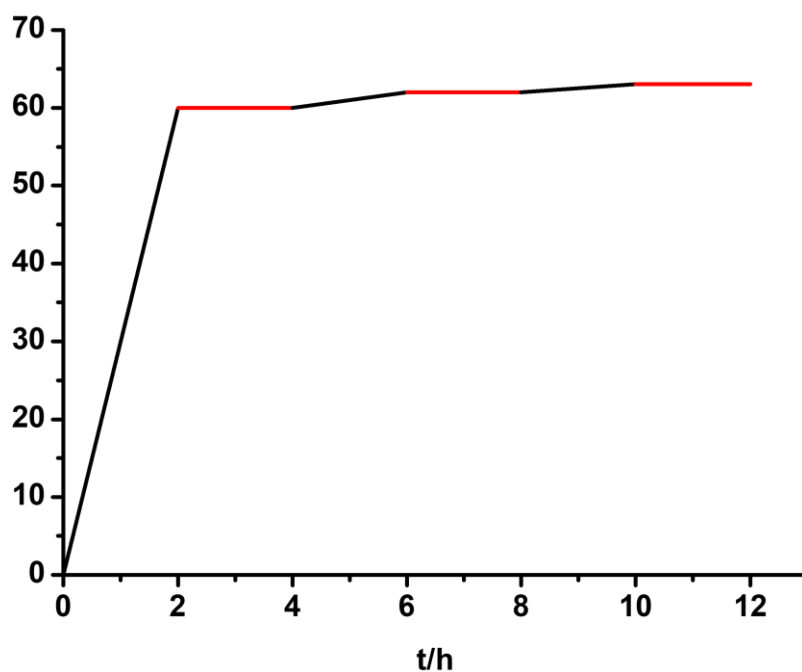

**Figure S1.** Time profile of the transformation with the light ON/OFF over time.

## Emission Quenching Experiments (Stern–Volmer Studies)<sup>e</sup>

All fluorescence measurements were recorded using a Hitachi FL-7000 Fluorometer. Quenching studies were conducted in EtOAc. All  $[\text{Ir}(\text{dFCF}_3\text{ppy})_2\text{dtbbpy}]\text{PF}_6$  solutions (concentration of  $5\ \mu\text{M}$ ) were excited at 320 nm and the emission intensity was collected at 517 nm. Measurements using corresponding quenchers were taken in triplicate at different concentrations.

### 2a of Fluorescence Spectra

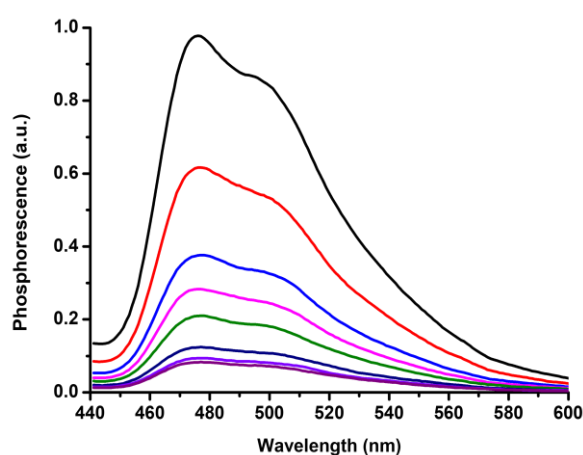

**Figure S2.** Fluorescence emission spectra of  $[\text{Ir}\{\text{dFCF}_3\text{ppy}\}_2(\text{dtbbpy})]\text{PF}_6$  ( $33.3\ \mu\text{M}$ ) in deoxygenated EtOAc with different concentration of **2a**. The excitation wavelength was 392 nm.

### 2b of Fluorescence Spectra

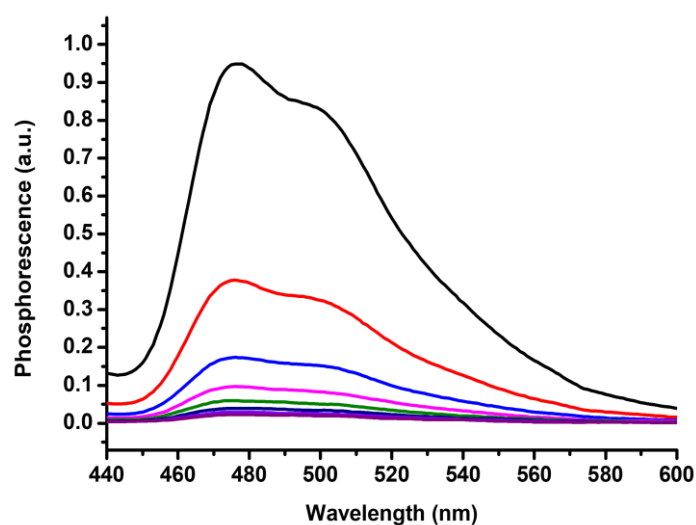

**Figure S3.** Fluorescence emission spectra of  $[\text{Ir}\{\text{dFCF}_3\text{ppy}\}_2(\text{dtbbpy})]\text{PF}_6$  (33.3  $\mu\text{M}$ ) in deoxygenated EtOAc with different concentration of **2a**. The excitation wavelength was 392 nm.

### CV studies for [Ir-F], **2a** and **2b**

Cyclic voltammetry Cyclic Voltammetry was performed using a CHI 660E potentiostat using a glassy carbon working electrode, Ag/AgCl in 3 M NaCl reference electrode, and a platinum counter electrode. The solution for test of [Ir-F], **2a** and **2b** was prepared by dissolving the sample (0.2 mmol) into a 0.1 M solution of tetrabutylammonium hexafluorophosphate ( $\text{TBAPF}_6$ ) in EtOAc (10 mL).

The potential range scanned was typically -2V and 2V at a 100mV/s.

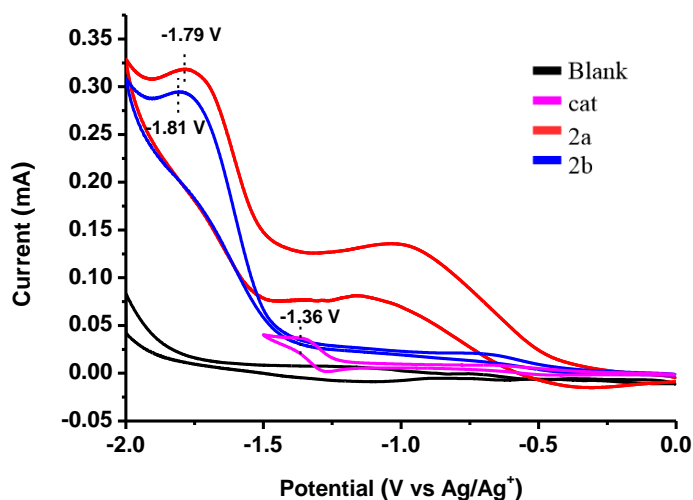

**Figure S4.** UV-Vis absorption spectra of photocatalyst  $[\text{Ir}\{\text{dFCF}_3\text{ppy}\}_2(\text{dtbbpy})]\text{PF}_6$  (15  $\mu\text{M}$ ), **2a** (40  $\mu\text{M}$ ), **2b** (40  $\mu\text{M}$ ), in deoxygenated EtOAc.

### Scale-up reaction

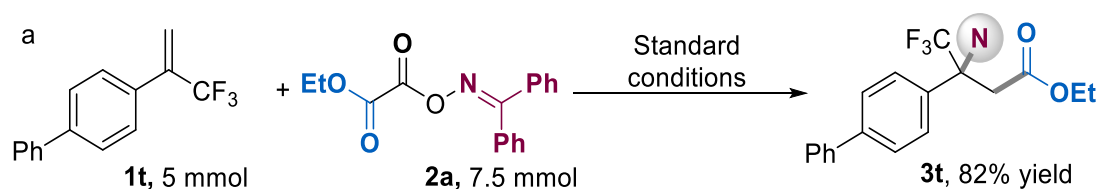

### Conversion of **3t**



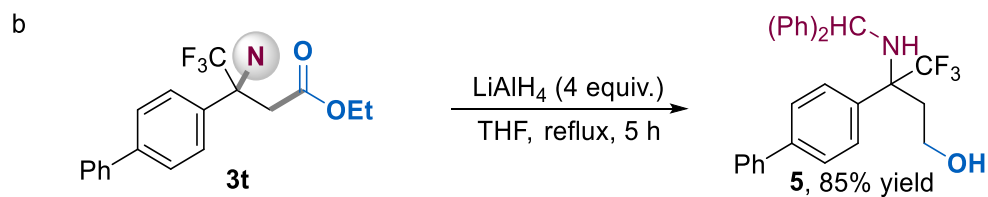

### Control reaction

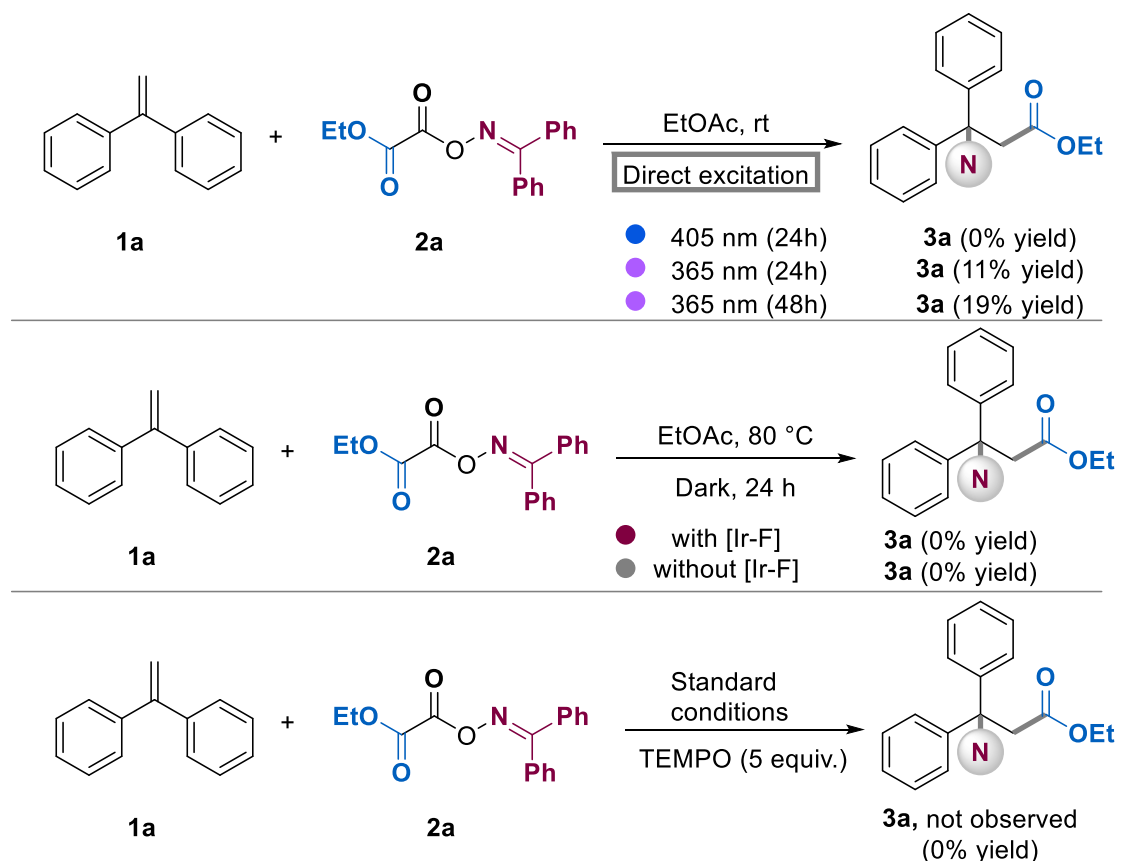

### Unsuccessful substrates

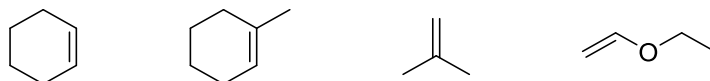

### References:

- a. M. L. Conner, M. K. Brown, *J. Org. Chem.* **2016**, *81*, 8050–8060.
- b. .Y. Liu, Y.-H. Zhou, Y.-L. Zhao, J.-P. Qu, *Org. Lett.* **2017**, *19*, 946-949.
- c. N. J. Adamson, H. Jeddi, S. J. Malcolmson, *J. Am. Chem. Soc.* **2019**, *141*, 8574–8583.
- d. M. A. Cismesias, T. P. Yoon, *Chem. Sci.* **2015**, *6*, 5426-5434.

e. J. D. Slinker, A. A. Gorodetsky, M. S. Lowry, J. Wang, S. Parker, R. Rohl, S. Bernhard, G. G.

Malliaras, *J. Am. Chem. Soc.* **2004**, *126*, 2763-2767.

## Characterization data of compounds 2a-2c, 3a-3z, 4a-4r and 5.

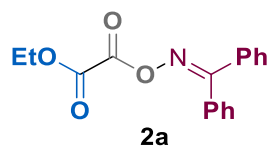

**2a:** light yellow solid, yield: 82%;

**m.p.** 75 – 76 °C;

**<sup>1</sup>H NMR** (400 MHz, Chloroform-*d*)  $\delta$  7.57 – 7.60 (m, 2H), 7.44 – 7.52 (m, 4H), 7.37 – 7.41 (m, 4H), 4.31 (q,  $J = 7.2$  Hz, 2H), 1.31 (t,  $J = 7.2$  Hz, 1H) ppm;

**<sup>13</sup>C NMR** (100 MHz, Chloroform-*d*)  $\delta$  167.3, 157.3, 156.3, 134.1, 131.6, 131.5, 130.3, 129.4, 129.3, 128.6, 128.3, 63.2, 13.9 ppm;

HRMS (ESI): C<sub>17</sub>H<sub>15</sub>NNaO<sub>4</sub><sup>+</sup> [M+Na]<sup>+</sup> Calcd 320.0893, Found 320.0894.

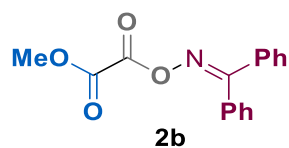

**2b:** light yellow solid, yield: 86%;

**m.p.** 80 – 81 °C;

**<sup>1</sup>H NMR** (400 MHz, Chloroform-*d*)  $\delta$  7.56 – 7.59 (m, 2H), 7.45 – 7.50 (m, 4H), 7.37 – 7.40 (m, 4H), 3.85 (s, 3H) ppm;

**<sup>13</sup>C NMR** (100 MHz, Chloroform-*d*)  $\delta$  167.5, 157.7, 156.1, 134.0, 131.6, 131.5, 130.4, 129.4, 129.2, 128.6, 128.3, 53.6 ppm;

HRMS (ESI): C<sub>16</sub>H<sub>13</sub>NNaO<sub>4</sub><sup>+</sup> [M+Na]<sup>+</sup> Calcd 306.0737, Found 306.0738.

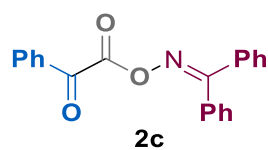

**2c:** white solid, yield: 79%;

**m.p.** 98 – 99 °C;

**<sup>1</sup>H NMR** (400 MHz, Chloroform-*d*)  $\delta$  7.93 – 7.96 (m, 2H), 7.61 – 7.66 (m, 1H), 7.42 – 7.50 (m, 8H), 7.32 – 7.39 (m, 4H) ppm;

**<sup>13</sup>C NMR** (100 MHz, Chloroform-*d*)  $\delta$  186.1, 166.7, 163.5, 135.1, 134.0, 132.5, 131.6, 131.5, 130.3, 129.80, 129.2, 129.2, 128.6, 128.4 ppm;

HRMS (ESI): C<sub>21</sub>H<sub>15</sub>NNaO<sub>3</sub><sup>+</sup> [M+Na]<sup>+</sup> Calcd 352.0944, Found 352.0940.

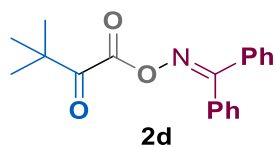

**2d:** white solid, yield: 73%;

**m.p.** 93 – 94 °C;

**<sup>1</sup>H NMR** (400 MHz, Chloroform-*d*)  $\delta$  7.53 – 7.56 (m, 2H), 7.43 – 7.50 (m, 4H), 7.31 – 7.39 (m, 4H), 1.21 (s, 9H) ppm;

**<sup>13</sup>C NMR** (100 MHz, Chloroform-*d*)  $\delta$  202.2, 166.4, 163.7, 134.0, 131.8, 131.5, 130.1, 129.1, 128.8, 128.6, 128.4, 42.7, 26.6 ppm;

HRMS (ESI): C<sub>19</sub>H<sub>19</sub>NNaO<sub>3</sub><sup>+</sup> [M+Na]<sup>+</sup> Calcd 332.1257, Found 332.1257.

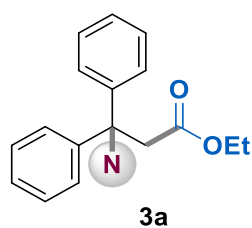

**3a:** 65.8 mg, light yellow oil, yield: 76%;

**<sup>1</sup>H NMR** (400 MHz, Chloroform-*d*)  $\delta$  7.67 – 7.70 (m, 2H), 7.28 – 7.37 (m, 7H), 7.11 – 7.20 (m, 7H), 7.06 (t, *J* = 7.6 Hz, 2H), 6.59 – 6.62 (m, 2H), 3.86 (q, *J* = 7.2 Hz, 2H), 3.18 (s, 2H), 0.93 (t, *J* = 7.2 Hz, 3H) ppm;

**<sup>13</sup>C NMR** (100 MHz, Chloroform-*d*)  $\delta$  170.3, 167.8, 148.9, 141.9, 138.5, 130.0, 128.5, 128.3, 128.0, 127.8, 127.7, 127.6, 127.4, 127.3, 126.3, 125.8, 67.3, 60.2, 45.1, 13.9 ppm;

HRMS (ESI): C<sub>30</sub>H<sub>28</sub>NO<sub>2</sub><sup>+</sup> [M+H]<sup>+</sup> Calcd 434.2115, Found 434.2114.

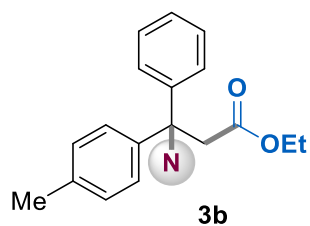

**3b:** 66.3 mg, light yellow oil, yield: 78%;

**<sup>1</sup>H NMR** (600 MHz, Chloroform-*d*)  $\delta$  7.60 – 7.61 (m, 2H), 7.27 – 7.30 (m, 1H), 7.20 – 7.25 (m, 4H), 7.04 – 7.12 (m, 6H), 6.98 (t, *J* = 7.2 Hz, 2H), 6.91 (d, *J* = 8.4 Hz, 2H), 6.53 – 6.54 (m, 2H), 3.79 (q, *J* = 7.2 Hz, 2H), 3.08 (s, 2H), 2.22 (s, 3H), 0.86 (t, *J* = 7.2 Hz, 3H) ppm;

**<sup>13</sup>C NMR** (150 MHz, Chloroform-*d*)  $\delta$  169.3, 166.4, 147.9, 144.9, 140.9, 137.5, 134.6, 128.8, 127.4, 127.36, 126.9, 126.7, 126.6, 126.5, 126.2, 126.1, 125.1, 66.1, 59.0, 44.0, 20.0, 12.9 ppm;

HRMS (ESI): C<sub>31</sub>H<sub>30</sub>NO<sub>2</sub><sup>+</sup> [M+H]<sup>+</sup> [M+Na]<sup>+</sup> Calcd 448.2271, Found 448.2273.

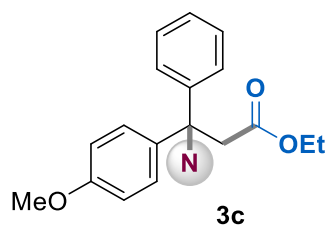

**3c:** 64.8 mg, light yellow oil, yield: 74%;

**<sup>1</sup>H NMR** (400 MHz, Chloroform-*d*)  $\delta$  7.66 – 7.69 (m, 2H), 7.29 – 7.36 (m, 5H), 7.13 – 7.21 (m, 6H), 7.06 – 7.10 (m, 2H), 6.70 – 6.73 (m, 2H), 6.61 – 6.63 (m, 2H), 3.87 (q,  $J = 7.2$  Hz, 2H), 3.77 (s, 3H), 0.94 (t,  $J = 7.2$  Hz, 3H) ppm;

**<sup>13</sup>C NMR** (100 MHz, Chloroform-*d*)  $\delta$  170.3, 167.5, 157.9, 149.1, 141.9, 141.1, 138.6, 129.9, 128.8, 128.4, 127.9, 127.8, 127.7, 127.6, 127.4, 127.3, 126.2, 113.1, 66.9, 60.1, 55.3, 45.3, 14.0 ppm;

HRMS (ESI): C<sub>31</sub>H<sub>30</sub>NO<sub>2</sub><sup>+</sup> [M+Na]<sup>+</sup> Calcd 461.0560, Found 461.0564.

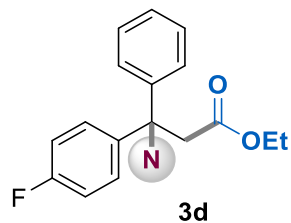

**3d:** 70.4 mg, light yellow oil, yield: 78%;

**<sup>1</sup>H NMR** (600 MHz, Chloroform-*d*)  $\delta$  7.66 – 7.68 (m, 2H), 7.36 – 7.39 (m, 1H), 7.29 – 7.32 (m, 4H), 7.14 – 7.22 (m, 6H), 7.08 (t,  $J = 7.8$  Hz, 2H), 6.88 (t,  $J = 9.0$  Hz, 2H), 6.22 (d,  $J = 7.2$  Hz, 2H), 3.87 (q,  $J = 7.2$  Hz, 2H), 3.13 – 3.19 (m, 2H), 0.94 (t,  $J = 7.2$  Hz, 3H) ppm;

**<sup>19</sup>F NMR** (565 MHz, Chloroform-*d*)  $\delta$  -117.1 ppm;

**<sup>13</sup>C NMR** (150 MHz, Chloroform-*d*)  $\delta$  170.1, 167.9, 161.3 (d,  $^1J_{C-F} = 243.6$  Hz), 148.5, 144.7 (d,  $^3J_{C-F} = 3.9$  Hz), 141.7, 138.4, 130.0, 129.3 (d,  $^3J_{C-F} = 7.7$  Hz), 128.4, 127.9, 127.8, 127.6, 127.4, 127.4, 127.3, 126.4, 114.5, 114.3, 66.9, 60.2, 45.2, 13.9 ppm;

HRMS (ESI): C<sub>30</sub>H<sub>27</sub>FNO<sub>2</sub><sup>+</sup> [M+H]<sup>+</sup> Calcd 452.2020, Found 452.2038.

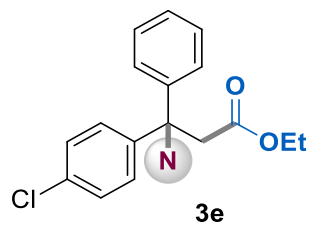

**3e:** 64.4 mg, light yellow oil, yield: 69%;

**<sup>1</sup>H NMR** (600 MHz, Chloroform-*d*)  $\delta$  7.65 – 7.70 (m, 2H), 7.36 – 7.39 (m, 1H), 7.29 – 7.34 (m, 4H), 7.14 – 7.22 (m, 8H), 7.09 (t,  $J = 7.8$  Hz, 2H), 6.62 (d,  $J = 4.8$  Hz, 2H), 3.88 (q,  $J = 7.2$  Hz, 2H), 3.12 – 3.20 (m, 2H), 0.95 (t,  $J = 7.2$  Hz, 3H) ppm;

$^{13}\text{C}$  NMR (150 MHz, Chloroform-*d*)  $\delta$  167.0, 168.1, 148.2, 147.5, 141.6, 138.3, 131.9, 130.1, 129.2, 128.4, 127.9, 127.9, 127.8, 127.6, 127.4, 127.38, 127.35, 126.4, 66.9, 60.2, 45.0, 13.9 ppm;

HRMS (ESI):  $\text{C}_{30}\text{H}_{27}\text{ClNO}_2^+$   $[\text{M}+\text{H}]^+$  Calcd 468.1725, Found 461.1724.

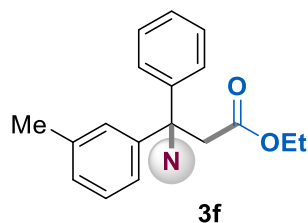

**3e:** 63.5 mg, light yellow oil, yield: 71%;

$^1\text{H}$  NMR (400 MHz, Chloroform-*d*)  $\delta$  7.67 – 7.70 (m, 2H), 7.29 – 7.38 (m, 5H), 7.14 – 7.22 (m, 4H), 7.00 – 7.08 (m, 5H), 6.93 – 6.95 (m, 1H), 6.60 (d,  $J = 7.2$  Hz, 2H), 3.86 (q,  $J = 7.2$  Hz, 2H), 3.11 – 3.21 (m, 2H), 2.21 (s, 3H), 0.95 (t,  $J = 7.2$  Hz, 3H) ppm;

$^{13}\text{C}$  NMR (100 MHz, Chloroform-*d*)  $\delta$  170.4, 167.6, 149.0, 148.6, 142.0, 138.5, 137.1, 129.9, 128.5, 128.3, 127.9, 127.8, 127.7, 127.7, 127.6, 127.3, 127.2, 127.0, 126.2, 125.1, 67.3, 60.1, 45.2, 21.6, 13.9 ppm;

HRMS (ESI):  $\text{C}_{31}\text{H}_{30}\text{NO}_2^+$   $[\text{M}+\text{H}]^+$  Calcd 448.2271, Found 448.2276.

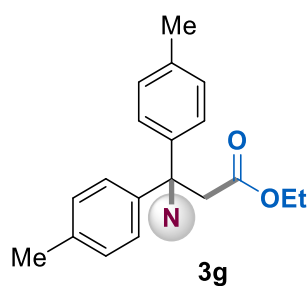

**3g:** 76.4 mg, white solid, yield: 83%;

**m.p.** 124 – 125 °C;

$^1\text{H}$  NMR (400 MHz, Chloroform-*d*)  $\delta$  7.66 – 7.70 (m, 2H), 7.27 – 7.36 (m, 3H), 7.15 – 7.19 (m, 5H), 7.05 (t,  $J = 7.6$  Hz, 2H), 6.97 (d,  $J = 7.6$  Hz, 4H), 6.62 (d,  $J = 7.2$  Hz, 2H), 3.87 (q,  $J = 7.2$  Hz, 2H), 3.13 (s, 2H), 2.28 (s, 6H), 0.94 (t,  $J = 7.2$  Hz, 3H) ppm;

$^{13}\text{C}$  NMR (100 MHz, Chloroform-*d*)  $\delta$  170.5, 167.3, 146.1, 142.0, 138.7, 135.6, 129.9, 128.5, 128.5, 127.9, 127.6, 127.6, 127.3, 127.2, 67.0, 60.1, 45.2, 21.1, 14.0 ppm;

HRMS (ESI):  $\text{C}_{32}\text{H}_{31}\text{NO}_2^+$   $[\text{M}+\text{H}]^+$  Calcd 461.2355, Found 461.2389.

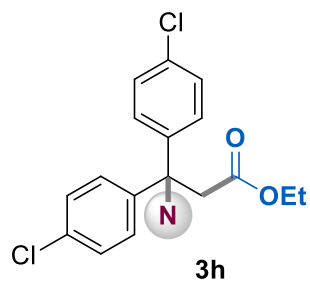

**3h:** 71.1mg, light yellow oil, yield: 71%;

**<sup>1</sup>H NMR** (400 MHz, Chloroform-*d*)  $\delta$  7.63 – 7.66 (m, 2H), 7.30 – 7.40 (m, 3H), 7.09 – 7.24 (m, 11H), 6.63 – 6.65 (m, 2H), 3.88 (q,  $J = 7.2$  Hz, 2H), 3.14 (s, 2H), 2.28 (s, 6H), 0.95 (t,  $J = 7.2$  Hz, 3H) ppm;

**<sup>13</sup>C NMR** (100 MHz, Chloroform-*d*)  $\delta$  169.7, 168.5, 146.9, 141.4, 138.3, 132.3, 130.3, 129.2, 128.4, 128.1, 128.0, 127.6, 127.5, 127.4, 66.7, 60.4, 45.2, 14.0 ppm;

HRMS (ESI): C<sub>30</sub>H<sub>26</sub>Cl<sub>2</sub>NO<sub>2</sub><sup>+</sup> [M+H]<sup>+</sup> Calcd 502.1335, Found 502.1339.

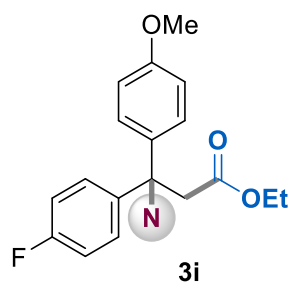

**3i:** 76.0 mg, light yellow oil, yield: 79%;

**<sup>1</sup>H NMR** (400 MHz, Chloroform-*d*)  $\delta$  7.65 – 7.67 (m, 2H), 7.29 – 7.38 (m, 5H), 7.18 – 7.23 (m, 1H), 7.08 – 7.12 (m, 4H), 6.86 – 6.90 (m, 2H), 6.68 – 6.72 (m, 2H), 6.63 (d,  $J = 8.0$  Hz, 2H), 3.88 (q,  $J = 7.2$  Hz, 2H), 3.76 (s, 3H), 3.09 – 3.17 (m, 2H), 0.95 (t,  $J = 7.2$  Hz, 3H) ppm;

**<sup>19</sup>F NMR** (565 MHz, Chloroform-*d*)  $\delta$  -117.2 ppm;

**<sup>13</sup>C NMR** (100 MHz, Chloroform-*d*)  $\delta$  170.2, 167.7, 161.3 (d,  $^1J_{C-F} = 245.0$  Hz), 158.1, 145.0, 144.98 (d,  $^3J_{C-F} = 3.0$  Hz), 141.8, 140.8, 138.5, 130.1, 129.4 (d,  $^3J_{C-F} = 7.6$  Hz), 128.7, 128.4, 128.0, 127.5, 127.4, 127.3, 114.4 (d,  $^2J_{C-F} = 21.2$  Hz), 113.2, 66.6, 60.2, 55.3, 45.5, 14.0 ppm;

HRMS (ESI): C<sub>31</sub>H<sub>29</sub>FNO<sub>3</sub><sup>+</sup> [M+H]<sup>+</sup> Calcd 482.2126, Found 482.2123.

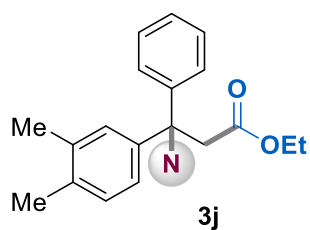

**3j:** 69.2 mg, light yellow oil, yield: 75%;

**<sup>1</sup>H NMR** (400 MHz, Chloroform-*d*)  $\delta$  7.67 – 7.69 (m, 2H), 7.29 – 7.38 (m, 5H), 7.12 – 7.22 (m, 4H), 7.03 – 7.07 (m, 2H), 6.90– 6.96 (m, 3H), 6.58 – 6.61 (m, 2H), 3.87 (q,  $J = 7.2$  Hz, 2H), 3.11 – 3.19 (m, 2H), 2.19 (s, 3H), 2.12 (s, 3H), 0.93 (t,  $J = 7.2$  Hz, 3H) ppm;

**<sup>13</sup>C NMR** (100 MHz, Chloroform-*d*)  $\delta$  170.4, 167.3, 149.1, 146.0, 142.0, 138.6, 135.6, 134.4, 129.9, 129.0, 128.9, 128.4, 127.9, 127.7, 127.6, 127.2, 127.1, 126.1, 125.2, 67.1, 60.1, 45.2, 20.0, 19.4, 13.9 ppm;

HRMS (ESI): C<sub>32</sub>H<sub>32</sub>NO<sub>2</sub><sup>+</sup> [M+H]<sup>+</sup> Calcd 462.2428, Found 462.2428.

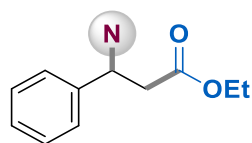

**3k**

**3k**: 46.4 mg, light yellow solid, yield: 65%;

**m.p.** 102 – 103 °C;

**<sup>1</sup>H NMR** (400 MHz, Chloroform-*d*)  $\delta$  7.64 – 7.66 (m, 2H), 7.26 – 7.43 (m, 9H), 7.20 – 7.24 (m, 2H), 7.03 – 7.07 (m, 2H), 7.03 – 7.06 (m, 2H), 4.87 (dd,  $J = 9.2, 4.4$  Hz, 1H), 3.98 – 4.12 (m, 2H), 3.06 (dd,  $J = 15.0, 9.2$  Hz, 1H), 2.77 (dd,  $J = 15.0, 4.4$  Hz, 1H), 1.16 (t,  $J = 7.2$  Hz, 3H) ppm;

**<sup>13</sup>C NMR** (100 MHz, Chloroform-*d*)  $\delta$  171.5, 168.3, 143.7, 139.9, 136.8, 130.1, 129.4, 128.8, 128.6, 128.5, 128.4, 128.1, 128.0, 127.9, 127.8, 127.1, 126.7, 63.1, 60.3, 44.6, 14.3 ppm;

HRMS (ESI): C<sub>24</sub>H<sub>24</sub>NO<sub>2</sub><sup>+</sup> [M+H]<sup>+</sup> Calcd 358.1802, Found 358.1799.

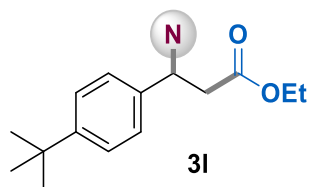

**3l**

**3l**: 56.2 mg, light yellow oil, yield: 68%;

**<sup>1</sup>H NMR** (400 MHz, Chloroform-*d*)  $\delta$  7.62 – 7.65 (m, 2H), 7.40 – 7.43 (m, 3H), 7.27 – 7.35 (m, 5H), 7.19 – 7.21 (m, 2H), 7.06 – 7.09 (m, 2H), 4.85 (dd,  $J = 9.2, 4.4$  Hz, 1H), 3.99 – 4.11 (m, 2H), 3.05 (dd,  $J = 15.0, 9.2$  Hz, 1H), 2.76 (dd,  $J = 15.0, 4.6$  Hz, 1H), 1.30 (s, 9H), 1.14 (t,  $J = 7.2$  Hz, 3H) ppm;

**<sup>13</sup>C NMR** (100 MHz, Chloroform-*d*)  $\delta$  171.6, 167.8, 149.8, 140.4, 140.0, 136.8, 130.1, 129.4, 128.7, 128.5, 128.4, 128.0, 127.9, 126.7, 125.3, 62.7, 60.3, 44.5, 34.5, 31.4, 14.2 ppm;

HRMS (ESI): C<sub>28</sub>H<sub>32</sub>NO<sub>2</sub><sup>+</sup> [M+H]<sup>+</sup> Calcd 414.2428, Found 414.2424.



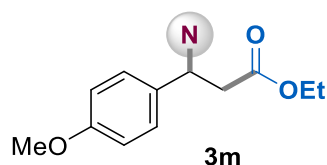

**3m:** 54.2 mg, light yellow solid, yield: 70%;

**m.p.** 110 – 111 °C;

**<sup>1</sup>H NMR** (400 MHz, Chloroform-*d*)  $\delta$  7.62 – 7.64 (m, 2H), 7.38 – 7.43 (m, 3H), 7.28 – 7.36 (m, 3H), 7.16 – 7.19 (m, 2H), 7.04 – 7.06 (m, 2H), 6.80 – 6.83 (m, 2H), 4.82 (dd,  $J$  = 9.2, 4.8 Hz, 1H), 3.99 – 4.12 (m, 2H), 3.77 (s, 3H), 3.03 (dd,  $J$  = 15.0, 9.2 Hz, 1H), 2.74 (dd,  $J$  = 15.0, 4.8 Hz, 1H), 1.16 (t,  $J$  = 7.2 Hz, 3H) ppm;

**<sup>13</sup>C NMR** (100 MHz, Chloroform-*d*)  $\delta$  171.5, 167.9, 158.6, 140.0, 136.8, 135.9, 130.0, 128.7, 128.5, 128.2, 128.1, 128.0, 127.9, 127.5, 127.3, 113.8, 62.4, 60.3, 55.2, 44.6, 14.3 ppm;

HRMS (ESI): C<sub>25</sub>H<sub>26</sub>NO<sub>3</sub><sup>+</sup> [M+H]<sup>+</sup> Calcd 388.1907, Found 388.1906.

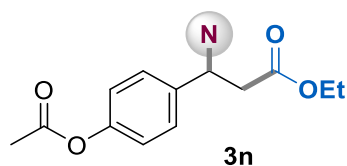

**3n:** 60.6 mg, light yellow oil, yield: 73%;

**<sup>1</sup>H NMR** (400 MHz, Chloroform-*d*)  $\delta$  7.62 – 7.65 (m, 2H), 7.37 – 7.43 (m, 3H), 7.25 – 7.37 (m, 5H), 7.03 – 7.07 (m, 2H), 6.98 – 7.02 (m, 2H), 4.87 (dd,  $J$  = 9.2, 4.6 Hz, 1H), 3.99 – 4.11 (m, 2H), 3.03 (dd,  $J$  = 15.0, 9.2 Hz, 1H), 2.75 (dd,  $J$  = 15.0, 4.8 Hz, 1H), 2.73 (s, 3H), 1.15 (t,  $J$  = 7.2 Hz, 3H) ppm;

**<sup>13</sup>C NMR** (100 MHz, Chloroform-*d*)  $\delta$  171.3, 169.6, 168.4, 149.6, 141.2, 139.8, 136.6, 130.2, 128.7, 128.6, 128.3, 128.1, 128.0, 127.8, 121.5, 62.5, 60.4, 44.6, 21.2, 14.2 ppm;

HRMS (ESI): C<sub>26</sub>H<sub>26</sub>NO<sub>4</sub><sup>+</sup> [M+H]<sup>+</sup> Calcd 416.1856, Found 416.1858.

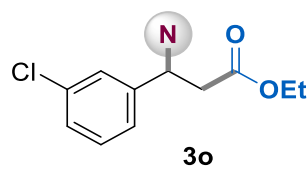

**3o:** 48.5 mg, light yellow oil, yield: 62%;

**<sup>1</sup>H NMR** (400 MHz, Chloroform-*d*)  $\delta$  7.63 – 7.66 (m, 2H), 7.28 – 7.44 (m, 7H), 7.18 – 7.21 (m, 2H), 7.10 – 7.13 (m, 1H), 7.02 – 7.05 (m, 2H), 4.83 (dd,  $J$  = 9.0, 4.6 Hz, 1H), 4.00 – 4.11 (m, 2H), 3.01 (dd,  $J$  = 15.0, 9.0 Hz, 1H), 2.75 (dd,  $J$  = 15.0, 4.8 Hz, 1H), 2.73 (s, 3H), 1.16 (t,  $J$  = 7.2 Hz, 3H) ppm;

$^{13}\text{C NMR}$  (100 MHz, Chloroform-*d*)  $\delta$  171.1, 168.9, 145.7, 139.7, 136.5, 134.2, 130.3, 129.8, 129.3, 128.8, 128.7, 128.4, 128.3, 128.2, 128.0, 127.8, 127.3, 125.2, 62.5, 60.4, 44.4, 14.2 ppm;

HRMS (ESI):  $\text{C}_{24}\text{H}_{23}\text{ClNO}_2^+ [\text{M}+\text{H}]^+$  Calcd 392.1412, Found 392.1412.

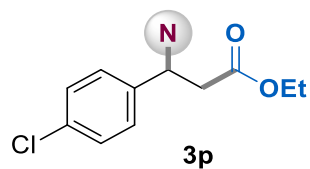

**3p**: 52.4 mg, white solid, yield: 67%;

**m.p.** 116 – 117 °C;

$^1\text{H NMR}$  (400 MHz, Chloroform-*d*)  $\delta$  7.62 – 7.65 (m, 2H), 7.29 – 7.42 (m, 6H), 7.23 – 7.26 (m, 2H), 7.18 – 7.20 (m, 2H), 7.01 – 7.04 (m, 2H), 4.84 (dd,  $J = 9.0, 4.8$  Hz, 1H), 3.98 – 4.11 (m, 2H), 3.01 (dd,  $J = 15.0, 9.0$  Hz, 1H), 2.74 (dd,  $J = 15.0, 4.8$  Hz, 1H), 2.73 (s, 3H), 1.16 (t,  $J = 7.2$  Hz, 3H) ppm;

$^{13}\text{C NMR}$  (100 MHz, Chloroform-*d*)  $\delta$  171.2, 168.7, 142.2, 139.7, 136.6, 132.7, 130.2, 128.7, 128.6, 128.4, 128.3, 128.1, 127.7, 62.3, 60.4, 44.4, 14.2 ppm;

HRMS (ESI):  $\text{C}_{24}\text{H}_{23}\text{ClNO}_2^+ [\text{M}+\text{H}]^+$  Calcd 392.1412, Found 392.1410.

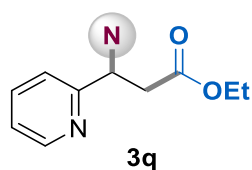

**3q**: 47.3 mg, light yellow oil, yield: 66%;

$^1\text{H NMR}$  (400 MHz, Chloroform-*d*)  $\delta$  8.51 – 8.53 (m, 1H), 7.67 – 7.71 (m, 2H), 7.60 – 7.64 (m, 1H), 7.37 – 7.42 (m, 4H), 7.31 – 7.35 (m, 3H), 7.08 – 7.15 (m, 3H), 5.07 (dd,  $J = 8.4, 4.8$  Hz, 1H), 4.00 – 4.11 (m, 2H), 3.00 – 3.12 (m, 2H), 1.15 (t,  $J = 7.2$  Hz, 3H) ppm;

$^{13}\text{C NMR}$  (100 MHz, Chloroform-*d*)  $\delta$  171.5, 169.7, 162.1, 149.1, 139.8, 136.6, 136.4, 130.3, 128.9, 128.7, 128.4, 128.3, 128.1, 127.8, 122.1, 121.8, 64.4, 60.3, 42.5, 14.2 ppm;

HRMS (ESI):  $\text{C}_{23}\text{H}_{23}\text{ClN}_2\text{O}_2^+ [\text{M}+\text{H}]^+$  Calcd 359.1754, Found 359.1756.

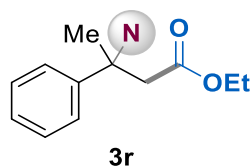

**3r**: 58.6 mg, light yellow oil, yield: 79%;

$^1\text{H NMR}$  (400 MHz, Chloroform-*d*)  $\delta$  7.57 – 7.59 (m, 2H), 7.27 – 7.37 (m, 3H), 7.14 – 7.20 (m, 6H), 7.07 (t,  $J = 7.6$  Hz, 2H), 6.61 (t,  $J = 7.4$  Hz, 2H), 4.03 (q,  $J = 7.2$  Hz, 2H), 3.17 (d,  $J = 13.6$  Hz, 1H), 2.93 (d,  $J = 13.6$  Hz, 1H), 1.57 (s, 3H), 1.12 (t,  $J = 7.2$  Hz, 3H) ppm;

$^{13}\text{C}$  NMR (100 MHz, Chloroform-*d*)  $\delta$  171.3, 166.7, 148.2, 141.5, 138.6, 129.8, 128.4, 128.3, 127.9, 127.8, 127.5, 127.3, 126.4, 126.4, 62.9, 60.0, 52.1, 25.5, 14.2 ppm;

HRMS (ESI):  $\text{C}_{25}\text{H}_{26}\text{NO}_2^+$   $[\text{M}+\text{H}]^+$  Calcd 372.1958, Found 372.1967.

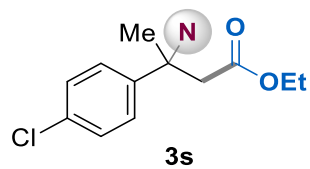

**3s:** 62.4 mg, light yellow oil, yield: 77%;

$^1\text{H}$  NMR (400 MHz, Chloroform-*d*)  $\delta$  7.50 – 7.51 (m, 2H), 7.26 – 7.30 (m, 1H), 7.20 – 7.24 (m, 2H), 7.12 – 7.16 (m, 1H), 7.01 – 7.07 (m, 6H), 6.56 (d,  $J = 7.2$  Hz, 2H), 3.94 (q,  $J = 7.2$  Hz, 2H), 3.05 (d,  $J = 13.8$  Hz, 1H), 2.87 (d,  $J = 13.8$  Hz, 1H), 1.49 (s, 3H), 1.05 (t,  $J = 7.2$  Hz, 3H) ppm;

$^{13}\text{C}$  NMR (100 MHz, Chloroform-*d*)  $\delta$  169.9, 166.0, 145.4, 140.2, 137.4, 131.1, 129.1, 128.9, 127.3, 127.3, 126.9, 126.8, 126.7, 126.6, 126.4, 61.4, 59.0, 50.7, 24.5, 13.1 ppm;

HRMS (ESI):  $\text{C}_{25}\text{H}_{25}\text{ClNO}_2^+$   $[\text{M}+\text{H}]^+$  Calcd 406.1568, Found 406.1568.

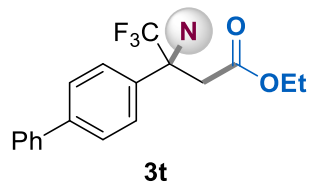

**3t:** 86.2 mg, light yellow oil, yield: 86%;

$^1\text{H}$  NMR (400 MHz, Chloroform-*d*)  $\delta$  7.65 – 7.68 (m, 2H), 7.58 – 7.61 (m, 2H), 7.31 – 7.50 (m, 10H), 7.17 – 7.21 (m, 1H), 7.04 (t,  $J = 7.6$  Hz, 2H), 4.13 (q,  $J = 7.2$  Hz, 2H), 3.20 (d,  $J = 14.6$  Hz, 1H), 2.76 (d,  $J = 14.6$  Hz, 1H), 1.19 (t,  $J = 7.2$  Hz, 3H) ppm;

$^{19}\text{F}$  NMR (375 MHz, Chloroform-*d*)  $\delta$  -76.7 ppm;

$^{13}\text{C}$  NMR (100 MHz, Chloroform-*d*)  $\delta$  170.5, 168.8, 141.3, 140.9, 140.2, 139.1, 137.7, 130.6, 128.9, 128.8, 128.5, 128.3, 128.2, 128.1, 127.8, 127.7, 127.4, 127.1, 126.8, 126.2 (q,  $^1J_{\text{C-F}} = 283.5$  Hz), 67.9 (q,  $^2J_{\text{C-F}} = 25.8$  Hz), 60.8, 36.1, 29.8, 14.0 ppm;

HRMS (ESI):  $\text{C}_{31}\text{H}_{27}\text{F}_3\text{NO}_2^+$   $[\text{M}+\text{H}]^+$  Calcd 502.1988, Found 502.1987.

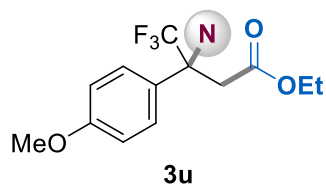

**3u:** 74.6 mg, light yellow oil, yield: 82%;

$^1\text{H}$  NMR (600 MHz, Chloroform-*d*)  $\delta$  7.63 – 7.64 (m, 2H), 7.37 – 7.40 (m, 1H), 7.30 – 7.33 (m, 2H), 7.19 – 7.22 (m, 3H), 7.07 (t,  $J = 7.8$  Hz, 2H), 6.77 – 6.80 (m, 2H), 6.64 – 6.66 (m, 2H), 4.11

(q,  $J = 7.2$  Hz, 2H), 3.80 (s, 3H), 3.12 (d,  $J = 14.6$  Hz, 1H), 2.65 (d,  $J = 14.6$  Hz, 1H), 1.18 (t,  $J = 7.2$  Hz, 3H) ppm;

$^{19}\text{F}$  NMR (565 MHz, Chloroform- $d$ )  $\delta$  -77.1 ppm;

$^{13}\text{C}$  NMR (150 MHz, Chloroform- $d$ )  $\delta$  170.1, 168.8, 159.6, 140.9, 137.7, 132.3, 130.4, 129.1, 128.8, 128.1, 128.0, 127.8, 127.3, 126.1 (q,  $^1J_{\text{C-F}} = 282.3$  Hz), 113.5, 67.6 (q,  $^2J_{\text{C-F}} = 26.0$  Hz), 60.7, 55.3, 35.9, 29.7, 14.0 ppm;

HRMS (ESI):  $\text{C}_{26}\text{H}_{25}\text{F}_3\text{NO}_3^+ [\text{M}+\text{H}]^+$  Calcd 456.1781, Found 456.1782.

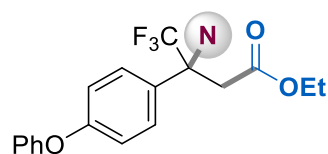

**3v**

**3v**: 87.9 mg, light yellow oil, yield: 85%;

$^1\text{H}$  NMR (600 MHz, Chloroform- $d$ )  $\delta$  7.63 – 7.64 (m, 2H), 7.30 – 7.40 (m, 5H), 7.22 – 7.25 (m, 3H), 7.10 – 7.14 (m, 3H), 7.02 (d,  $J = 8.1$  Hz, 2H), 6.88 (d,  $J = 8.8$  Hz, 2H), 6.64 – 6.78 (m, 2H), 4.12 (q,  $J = 7.2$  Hz, 2H), 3.14 (d,  $J = 14.5$  Hz, 1H), 2.71 (d,  $J = 14.5$  Hz, 1H), 1.18 (t,  $J = 7.2$  Hz, 3H) ppm;

$^{19}\text{F}$  NMR (565 MHz, Chloroform- $d$ )  $\delta$  -76.8 ppm;

$^{13}\text{C}$  NMR (150 MHz, Chloroform- $d$ )  $\delta$  170.4, 168.7, 157.5, 156.6, 140.8, 137.7, 134.6, 130.5, 129.9, 129.5, 128.8, 128.3, 128.2, 128.0, 127.8, 127.4, 126.3 (q,  $^1J_{\text{C-F}} = 285.4$  Hz), 123.7, 119.1, 118.1, 67.6 (q,  $^2J_{\text{C-F}} = 25.9$  Hz), 60.8, 36.1, 29.7, 14.0 ppm;

HRMS (ESI):  $\text{C}_{31}\text{H}_{26}\text{F}_3\text{NNaO}_3^+ [\text{M}+\text{Na}]^+$  Calcd 540.1757, Found 540.1776.

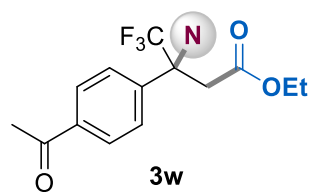

**3w**

**3w**: 75.7 mg, light yellow oil, yield: 81%;

$^1\text{H}$  NMR (600 MHz, Chloroform- $d$ )  $\delta$  7.89 – 7.91 (m, 1H), 7.82 – 7.84 (m, 1H), 7.62 – 7.65 (m, 3H), 7.38 – 7.41 (m, 2H), 7.30 – 7.33 (m, 2H), 7.16 – 7.19 (m, 1H), 7.01 – 7.05 (m, 2H), 6.54 – 6.74 (m, 2H), 4.12 (q,  $J = 7.2$  Hz, 2H), 3.23 (d,  $J = 14.6$  Hz, 1H), 2.82 (d,  $J = 14.6$  Hz, 1H), 2.53 (s, 3H), 1.18 (t,  $J = 7.2$  Hz, 3H) ppm;

$^{19}\text{F}$  NMR (565 MHz, Chloroform- $d$ )  $\delta$  -76.6 ppm;

$^{13}\text{C}$  NMR (150 MHz, Chloroform-*d*)  $\delta$  197.5, 171.0, 168.5, 140.5, 137.5, 136.8, 133.2, 130.7, 128.8, 128.6, 128.5, 128.3, 128.3, 128.1, 127.6, 127.4, 127.2, 124.3 (q,  $^1J_{\text{C-F}} = 285.3$  Hz), 68.0 (q,  $^2J_{\text{C-F}} = 25.9$  Hz), 60.9, 36.3, 26.7, 13.9 ppm;

HRMS (ESI):  $\text{C}_{27}\text{H}_{24}\text{F}_3\text{NNaO}_3^+ [\text{M}+\text{Na}]^+$  Calcd 490.1600, Found 490.1605.

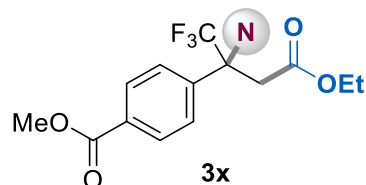

**3x**: 77.3 mg, light yellow oil, yield: 80%;

$^1\text{H}$  NMR (600 MHz, Chloroform-*d*)  $\delta$  7.93 – 7.94 (m, 2H), 7.63 – 7.65 (m, 2H), 7.39 – 7.42 (m, 3H), 7.32 – 7.35 (m, 2H), 7.19 – 7.22 (m, 1H), 7.04 – 7.08 (m, 2H), 6.52 – 6.74 (m, 2H), 4.12 (q,  $J = 7.2$  Hz, 2H), 3.92 (s, 3H), 3.18 (d,  $J = 14.6$  Hz, 1H), 2.74 (d,  $J = 14.6$  Hz, 1H), 1.19 (t,  $J = 7.2$  Hz, 3H) ppm;

$^{19}\text{F}$  NMR (565 MHz, Chloroform-*d*)  $\delta$  -76.6 ppm;

$^{13}\text{C}$  NMR (150 MHz, Chloroform-*d*)  $\delta$  170.9, 168.4, 166.6, 144.9, 140.6, 137.5, 130.7, 130.2, 129.3, 128.9, 128.4, 128.2, 128.1, 127.7, 127.5, 126.0 (q,  $^1J_{\text{C-F}} = 285.4$  Hz), 68.0 (q,  $^2J_{\text{C-F}} = 25.8$  Hz), 60.8, 52.3, 36.0, 29.7, 14.0 ppm;

HRMS (ESI):  $\text{C}_{27}\text{H}_{25}\text{F}_3\text{NO}_4^+ [\text{M}+\text{H}]^+$  Calcd 484.1730, Found 484.1730.

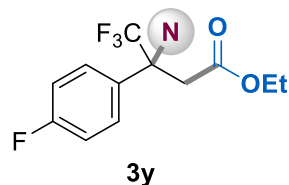

**3y**: 69.1 mg, light yellow oil, yield: 78%;

$^1\text{H}$  NMR (600 MHz, Chloroform-*d*)  $\delta$  7.62 – 7.64 (m, 2H), 7.39 – 7.41 (m, 1H), 7.32 – 7.34 (m, 2H), 7.28 – 7.30 (m, 2H), 7.21 – 7.24 (m, 1H), 7.09 (t,  $J = 7.7$  Hz, 2H), 6.95 – 6.98 (m, 2H), 6.55 – 6.72 (m, 2H), 4.12 (q,  $J = 7.2$  Hz, 2H), 3.12 (d,  $J = 14.6$  Hz, 1H), 2.70 (d,  $J = 14.6$  Hz, 1H), 1.19 (t,  $J = 7.2$  Hz, 3H) ppm;

$^{19}\text{F}$  NMR (565 MHz, Chloroform-*d*)  $\delta$  -77.0, -113.12 – 113.16 (m) ppm;

$^{13}\text{C}$  NMR (150 MHz, Chloroform-*d*)  $\delta$  170.6, 168.5, 162.6 (d,  $^1J_{\text{C-F}} = 249.3$  Hz), 140.7, 137.6, 136.0, 135.9, 130.6, 129.9 (d,  $^3J_{\text{C-F}} = 7.9$  Hz), 128.8, 128.3, 128.0, 127.6, 127.4, 126.2 (q,  $^1J_{\text{C-F}} = 284.9$  Hz), 115.1 (d,  $^2J_{\text{C-F}} = 21.7$  Hz), 67.6 (q,  $^2J_{\text{C-F}} = 26.1$  Hz), 60.8, 36.1, 13.9 ppm;

HRMS (ESI):  $\text{C}_{25}\text{H}_{22}\text{F}_4\text{NO}_2^+ [\text{M}+\text{H}]^+$  Calcd 444.1581, Found 444.1580.

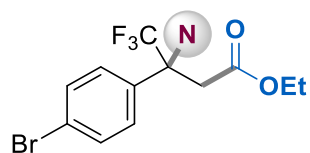

**3z**

**3z:** 79.6 mg, light yellow oil, yield: 79%;

**<sup>1</sup>H NMR** (600 MHz, Chloroform-*d*)  $\delta$  7.62 – 7.64 (m, 2H), 7.39 – 7.42 (m, 3H), 7.32 – 7.34 (m, 2H), 7.22 – 7.25 (m, 2H), 7.18 – 7.20 (m, 1H), 7.10 (t,  $J = 7.7$  Hz, 2H), 6.60 – 6.75 (m, 2H), 4.11 (q,  $J = 7.2$  Hz, 2H), 3.11 (d,  $J = 14.9$  Hz, 1H), 2.69 (d,  $J = 14.9$  Hz, 1H), 1.18 (t,  $J = 7.2$  Hz, 3H) ppm;

**<sup>19</sup>F NMR** (565 MHz, Chloroform-*d*)  $\delta$  -76.9 ppm;

**<sup>13</sup>C NMR** (150 MHz, Chloroform-*d*)  $\delta$  170.8, 168.5, 140.6, 139.1, 137.5, 131.3, 130.7, 129.8, 128.9, 128.4, 128.3, 128.1, 127.7, 127.5, 126.0 (q,  $^1J_{C-F} = 284.8$  Hz), 122.9, 67.4 (q,  $^2J_{C-F} = 26.0$  Hz), 60.9, 36.0, 14.0 ppm

HRMS (ESI): C<sub>25</sub>H<sub>22</sub>BrF<sub>3</sub>NO<sub>2</sub><sup>+</sup> [M+H]<sup>+</sup> Calcd 504.0781, Found 504.0780.

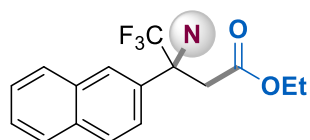

**4a**

**4a:** 68.4 mg, light yellow oil, yield: 72%;

**<sup>1</sup>H NMR** (600 MHz, Chloroform-*d*)  $\delta$  7.82 (d,  $J = 8.0$  Hz, 1H), 7.77 (d,  $J = 8.7$  Hz, 1H), 7.70 (d,  $J = 8.1$  Hz, 1H), 7.68 – 7.65 (m, 2H), 7.62 (d,  $J = 2.0$  Hz, 1H), 7.56 (d,  $J = 8.8$  Hz, 1H), 7.46 – 7.53 (m, 2H), 7.40 – 7.43 (m, 1H), 7.32 – 7.35 (m, 2H), 7.07 – 7.10 (m, 2H), 6.87 (s, 2H), 6.45 – 6.70 (m, 2H), 4.14 (q,  $J = 7.2$  Hz, 2H), 3.32 (d,  $J = 14.6$  Hz, 1H), 2.83 (d,  $J = 14.6$  Hz, 1H), 1.21 (t,  $J = 7.2$  Hz, 3H) ppm;

**<sup>19</sup>F NMR** (565 MHz, Chloroform-*d*)  $\delta$  -76.5 ppm;

**<sup>13</sup>C NMR** (150 MHz, Chloroform-*d*)  $\delta$  170.6, 168.8, 140.9, 137.5, 137.4, 132.9, 132.6, 130.6, 128.9, 128.4, 128.3, 128.2, 128.0, 127.9, 127.7, 127.4, 127.2, 126.9, 126.8, 126.3, 126.0, 126.0 (q,  $^1J_{C-F} = 285.3$  Hz), 68.1 (q,  $^2J_{C-F} = 26.0$  Hz), 60.8, 36.1, 29.7, 14.0 ppm

HRMS (ESI): C<sub>29</sub>H<sub>25</sub>F<sub>3</sub>NO<sub>2</sub><sup>+</sup> [M+H]<sup>+</sup> Calcd 476.1832, Found 476.1842.

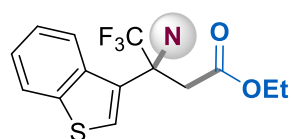

**4b**

**4b:** 66.4 mg, light yellow oil, yield: 69%;

**<sup>1</sup>H NMR** (600 MHz, Chloroform-*d*)  $\delta$  8.08 (d,  $J = 8.3$  Hz, 1H), 7.81 (d,  $J = 8.1$  Hz, 1H), 7.64 (dd,  $J = 8.4, 1.4$  Hz, 2H), 7.39 – 7.42 (m, 1H), 7.29 – 7.34 (m, 4H), 7.24 – 7.26 (m, 2H), 7.14 – 7.17 (m, 1H), 6.93 – 7.04 (m, 3H), 4.17 (q,  $J = 7.2$  Hz, 2H), 3.24 (d,  $J = 13.8$  Hz, 1H), 2.83 (d,  $J = 13.8$  Hz, 1H), 1.21 (t,  $J = 7.2$  Hz, 3H) ppm;

**<sup>19</sup>F NMR** (565 MHz, Chloroform-*d*)  $\delta$  -75.5 ppm;

**<sup>13</sup>C NMR** (150 MHz, Chloroform-*d*)  $\delta$  170.6, 168.5, 140.2, 140.1, 137.9, 136.8, 134.4, 130.6, 128.7, 128.2, 128.0, 127.2, 126.8, 126.7, 126.4 (q,  $^1J_{C-F} = 284.6$  Hz), 125.1, 124.4, 124.4, 122.6, 67.8 (q,  $^2J_{C-F} = 27.4$  Hz), 60.9, 38.1, 29.7, 13.9 ppm

HRMS (ESI): C<sub>27</sub>H<sub>23</sub>F<sub>3</sub>NO<sub>2</sub>S<sup>+</sup> [M+H]<sup>+</sup> Calcd 482.1396, Found 482.1395.

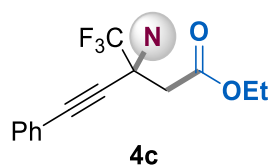

**4c**: 59.3 mg, light yellow oil, yield: 66%;

**<sup>1</sup>H NMR** (600 MHz, Chloroform-*d*)  $\delta$  7.58 – 7.60 (m, 2H), 7.35 – 7.40 (m, 3H), 7.29 – 7.32 (m, 4H), 7.22 – 7.25 (m, 2H), 7.17 – 7.20 (m, 2H), 7.03 – 7.04 (m, 2H), 4.14 (q,  $J = 7.2$  Hz, 2H), 3.28 (d,  $J = 14.2$  Hz, 1H), 3.06 (d,  $J = 14.2$  Hz, 1H), 1.19 (t,  $J = 7.2$  Hz, 3H) ppm;

**<sup>19</sup>F NMR** (565 MHz, Chloroform-*d*)  $\delta$  -77.5 ppm;

**<sup>13</sup>C NMR** (150 MHz, Chloroform-*d*)  $\delta$  171.8, 168.0, 140.6, 136.2, 131.8, 130.7, 129.0, 128.7, 128.6, 128.5, 128.0, 127.8, 127.5, 124.4 (q,  $^1J_{C-F} = 283.9$  Hz), 121.9, 91.2, 82.6, 63.4 (q,  $^2J_{C-F} = 28.4$  Hz), 60.8, 42.7, 29.7, 14.1 ppm;

HRMS (ESI): C<sub>27</sub>H<sub>23</sub>F<sub>3</sub>NO<sub>2</sub><sup>+</sup> [M+H]<sup>+</sup> Calcd 450.1675, Found 450.1681.

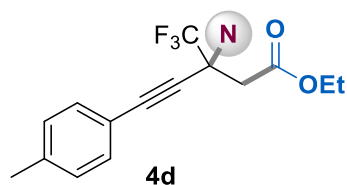

**4d**: 64.8 mg, light yellow oil, yield: 70%;

**<sup>1</sup>H NMR** (400 MHz, Chloroform-*d*)  $\delta$  7.57 – 7.60 (m, 2H), 7.28 – 7.41 (m, 7H), 7.22 – 7.25 (m, 1H), 7.00 (d,  $J = 8.0$  Hz, 2H), 6.93 (d,  $J = 8.0$  Hz, 2H), 4.13 (q,  $J = 7.2$  Hz, 2H), 3.26 (d,  $J = 14.2$  Hz, 1H), 3.04 (d,  $J = 14.2$  Hz, 1H), 2.31 (s, 3H), 1.18 (t,  $J = 7.2$  Hz, 3H) ppm;

**<sup>19</sup>F NMR** (375 MHz, Chloroform-*d*)  $\delta$  -77.6 ppm;

$^{13}\text{C}$  NMR (100 MHz, Chloroform-*d*)  $\delta$  171.8, 168.1, 140.7, 138.7, 136.3, 132.5, 131.7, 130.7, 130.1, 129.4, 129.0, 128.7, 128.6, 128.3, 128.1, 128.0, 127.9, 127.5, 118.9, 91.3, 81.9, 63.4 (q,  $^2J_{\text{C-F}} = 28.4$  Hz), 60.8, 42.7, 21.5, 14.1 ppm;

HRMS (ESI):  $\text{C}_{28}\text{H}_{25}\text{F}_3\text{NO}_2^+ [\text{M}+\text{H}]^+$  Calcd 464.1832, Found 464.1839.

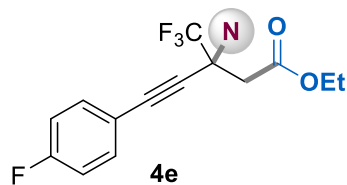

**4e**: 63.5 mg, light yellow oil, yield: 68%;

$^1\text{H}$  NMR (400 MHz, Chloroform-*d*)  $\delta$  7.56 – 7.59 (m, 2H), 7.28 – 7.41 (m, 7H), 7.21 – 7.25 (m, 1H), 7.00 – 7.03 (m, 2H), 6.86 – 6.91 (m, 2H), 4.14 (q,  $J = 7.2$  Hz, 2H), 3.29 (d,  $J = 14.2$  Hz, 1H), 3.05 (d,  $J = 14.2$  Hz, 1H), 1.19 (t,  $J = 7.2$  Hz, 3H) ppm;

$^{19}\text{F}$  NMR (375 MHz, Chloroform-*d*)  $\delta$  -77.5, -110.39 – 110.42 (m) ppm;

$^{13}\text{C}$  NMR (100 MHz, Chloroform-*d*)  $\delta$  171.8, 168.0, 162.6 (d,  $^1J_{\text{C-F}} = 250.0$  Hz), 140.6, 136.3, 133.8, 133.7, 130.8, 129.0, 128.7, 128.6, 128.0, 127.5, 115.1 (d,  $^2J_{\text{C-F}} = 22.1$  Hz), 90.3, 82.3, 63.4 (q,  $^2J_{\text{C-F}} = 28.4$  Hz), 60.9, 42.8, 14.2 ppm;

HRMS (ESI):  $\text{C}_{27}\text{H}_{22}\text{F}_4\text{NO}_2^+ [\text{M}+\text{H}]^+$  Calcd 468.1581, Found 468.1588.

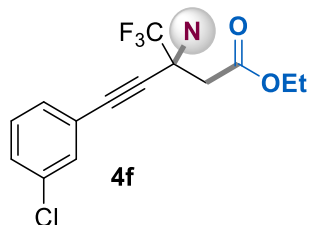

**4f**: 59.9 mg, light yellow oil, yield: 62%;

$^1\text{H}$  NMR (400 MHz, Chloroform-*d*)  $\delta$  7.56 – 7.59 (m, 2H), 7.46 – 7.49 (m, 1H), 7.28 – 7.41 (m, 6H), 7.21 – 7.24 (m, 1H), 7.12 (t,  $J = 7.8$  Hz, 2H), 6.97 (t,  $J = 1.8$  Hz, 2H), 6.91 – 6.93 (m, 1H), 4.15 (q,  $J = 7.2$  Hz, 2H), 3.31 (d,  $J = 14.2$  Hz, 1H), 3.06 (d,  $J = 14.2$  Hz, 1H), 1.20 (t,  $J = 7.2$  Hz, 3H) ppm;

$^{19}\text{F}$  NMR (375 MHz, Chloroform-*d*)  $\delta$  -77.4 ppm;

$^{13}\text{C}$  NMR (100 MHz, Chloroform-*d*)  $\delta$  172.0, 167.9, 159.0, 140.5, 138.2, 136.2, 135.5, 133.6, 131.8, 130.8, 130.1, 129.9, 129.6, 129.4, 129.1, 129.0, 128.9, 128.8, 128.7, 128.6, 128.3, 128.1, 127.9, 127.6, 124.3 (q,  $^1J_{\text{C-F}} = 282.9$  Hz), 123.6, 90.1, 83.8, 63.5 (q,  $^2J_{\text{C-F}} = 28.5$  Hz), 60.9, 42.8, 14.2 ppm;

HRMS (ESI):  $\text{C}_{27}\text{H}_{22}\text{ClF}_3\text{NO}_2^+ [\text{M}+\text{H}]^+$  Calcd 484.1286, Found 484.1291.



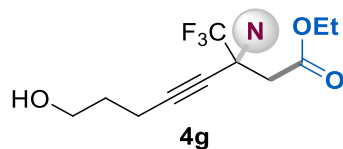

**4g:** 51.7 mg, light yellow oil, yield: 60%;

**<sup>1</sup>H NMR** (400 MHz, Chloroform-*d*)  $\delta$  7.55 – 7.57 (m, 2H), 7.36 – 7.43 (m, 4H), 7.28 – 7.32 (m, 4H), 4.12 (q,  $J = 7.2$  Hz, 2H), 3.52 (t,  $J = 6.1$  Hz, 1H), 3.18 (d,  $J = 14.2$  Hz, 1H), 2.93 (d,  $J = 14.2$  Hz, 1H), 1.76 – 1.88 (m, 2H), 1.40 – 1.47 (m, 2H), 1.19 (t,  $J = 7.2$  Hz, 3H) ppm;

**<sup>19</sup>F NMR** (375 MHz, Chloroform-*d*)  $\delta$  -77.8 ppm;

**<sup>13</sup>C NMR** (100 MHz, Chloroform-*d*)  $\delta$  171.4, 168.4, 140.6, 136.4, 130.7, 128.9, 128.6, 128.5, 128.0, 127.4, 124.4 (q,  $^1J_{C-F} = 284.0$  Hz), 92.0, 73.9, 63.0 (q,  $^2J_{C-F} = 28.3$  Hz), 61.3, 60.9, 42.9, 30.2, 15.4, 14.1 ppm;

HRMS (ESI): C<sub>24</sub>H<sub>25</sub>F<sub>3</sub>NO<sub>3</sub><sup>+</sup> [M+H]<sup>+</sup> Calcd 432.1781, Found 432.1782.

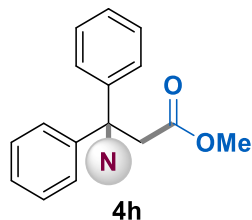

**4h:** 67.9 mg, light yellow oil, yield: 81%;

**<sup>1</sup>H NMR** (400 MHz, Chloroform-*d*)  $\delta$  7.67 – 7.69 (m, 2H), 7.28 – 7.37 (m, 7H), 7.14 – 7.21 (m, 7H), 7.05 – 7.08 (m, 2H), 6.58 – 6.61 (m, 2H), 3.40 (s, 3H), 3.19 (s, 2H), ppm;

**<sup>13</sup>C NMR** (100 MHz, Chloroform-*d*)  $\delta$  170.7, 167.8, 148.8, 141.9, 138.5, 130.0, 128.5, 128.0, 127.8, 127.7, 127.5, 127.4, 127.3, 126.3, 67.3, 51.4, 44.9 ppm;

HRMS (ESI): C<sub>29</sub>H<sub>26</sub>NO<sub>2</sub><sup>+</sup> [M+H]<sup>+</sup> Calcd 420.1958, Found 420.1957.

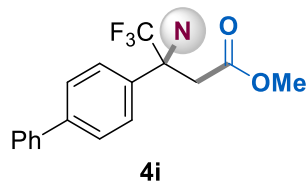

**4i:** 80.8 mg, light yellow oil, yield: 83%;

**<sup>1</sup>H NMR** (400 MHz, Chloroform-*d*)  $\delta$  7.64 – 7.67 (m, 2H), 7.58 – 7.61 (m, 2H), 7.31 – 7.51 (m, 10H), 7.17 – 7.22 (m, 1H), 7.05 (t,  $J = 7.6$  Hz, 2H), 6.62 – 6.76 (m, 2H), 3.67 (s, 3H), 3.21 (d,  $J = 14.6$  Hz, 1H), 2.75 (d,  $J = 14.6$  Hz, 1H) ppm;

**<sup>19</sup>F NMR** (375 MHz, Chloroform-*d*)  $\delta$  -76.9 ppm;

**<sup>13</sup>C NMR** (100 MHz, Chloroform-*d*)  $\delta$  170.7, 169.3, 141.3, 140.9, 140.2, 139.0, 137.7, 130.6, 128.9, 128.9, 128.4, 128.2, 128.1, 127.8, 127.7, 127.4, 127.1, 126.8, 126.4 (q,  $^1J_{C-F} = 285.4$  Hz), 67.9 (q,  $^2J_{C-F} = 26.1$  Hz), 52.0, 35.6 ppm;

HRMS (ESI): C<sub>30</sub>H<sub>25</sub>F<sub>3</sub>NO<sub>2</sub><sup>+</sup> [M+H]<sup>+</sup> Calcd 488.1832, Found 488.1832.

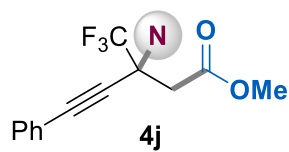

**4j**: 60.9 mg, light yellow oil, yield: 70%;

<sup>1</sup>H NMR (400 MHz, Chloroform-*d*) δ 7.57 – 7.60 (m, 2H), 7.27 – 7.41 (m, 8H), 7.17 – 7.24 (m, 3H), 7.02 – 7.05 (m, 2H), 3.69 (s, 3H), 3.31 (d, *J* = 14.4 Hz, 1H), 3.08 (d, *J* = 14.4 Hz, 1H) ppm;

<sup>19</sup>F NMR (375 MHz, Chloroform-*d*) δ -77.6 ppm;

<sup>13</sup>C NMR (100 MHz, Chloroform-*d*) δ 172.0, 168.5, 140.6, 136.2, 131.8, 130.8, 129.0, 128.7, 128.6, 128.5, 128.1, 127.8, 127.5, 124.4 (q, <sup>1</sup>*J*<sub>C-F</sub> = 284.2 Hz), 121.9, 91.4, 82.5, 63.4 (q, <sup>2</sup>*J*<sub>C-F</sub> = 28.2 Hz), 52.0, 42.5 ppm;

HRMS (ESI): C<sub>26</sub>H<sub>21</sub>F<sub>3</sub>NO<sub>2</sub><sup>+</sup> [M+H]<sup>+</sup> Calcd 436.1519, Found 436.1520.

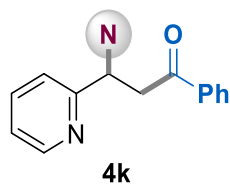

**4k**: 52.4 mg, light yellow oil, yield: 67%;

<sup>1</sup>H NMR (400 MHz, Chloroform-*d*) δ 8.53 – 8.54 (m, 1H), 7.93 – 7.95 (m, 2H), 7.60 – 7.64 (m, 2H), 7.47 – 7.52 (m, 1H), 7.27 – 7.41 (m, 10H), 7.06 – 7.15 (m, 3H), 5.28 (dd, *J* = 8.0, 4.8 Hz, 1H), 3.72 – 3.83 (m, 2H) ppm;

<sup>19</sup>F NMR (375 MHz, Chloroform-*d*) δ -77.6 ppm;

<sup>13</sup>C NMR (100 MHz, Chloroform-*d*) δ 198.4, 162.4, 149.2, 139.7, 137.3, 136.6, 136.6, 132.9, 130.2, 128.9, 128.6, 128.5, 128.4, 128.3, 128.1, 128.0, 127.7, 122.1, 122.0, 64.3, 46.4 ppm;

HRMS (ESI): C<sub>27</sub>H<sub>23</sub>F<sub>3</sub>N<sub>2</sub>O<sup>+</sup> [M+H]<sup>+</sup> Calcd 391.1805, Found 391.1806.

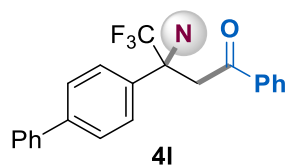

**4l**: 87.4 mg, white solid, yield: 82%;

**m.p.** 145 – 146 °C;

<sup>1</sup>H NMR (400 MHz, Chloroform-*d*) δ 7.80 – 7.82 (m, 2H), 7.71 – 7.74 (m, 2H), 7.60 – 7.63 (m, 2H), 7.53 – 7.57 (m, 4H), 7.32 – 7.48 (m, 9H), 7.08 – 7.12 (m, 1H), 6.93 (t, *J* = 7.6 Hz, 2H), 6.65 – 6.76 (m, 2H), 4.11 (d, *J* = 16.6 Hz, 1H), 3.15 (d, *J* = 16.6 Hz, 1H) ppm;

<sup>19</sup>F NMR (375 MHz, Chloroform-*d*) δ -75.4 ppm;

$^{13}\text{C}$  NMR (100 MHz, Chloroform-*d*)  $\delta$  194.3, 169.6, 141.1, 141.0, 140.3, 140.1, 138.0, 137.7, 133.0, 130.6, 129.7, 129.4, 129.0, 128.9, 128.7, 128.5, 128.4, 128.2, 128.1, 128.0, 127.9, 127.8, 127.7, 127.5, 127.2, 126.9, 126.5 (q,  $^1J_{\text{C-F}} = 284.9$  Hz), 68.4 (q,  $^2J_{\text{C-F}} = 25.9$  Hz), 38.6 ppm;

HRMS (ESI):  $\text{C}_{35}\text{H}_{27}\text{F}_3\text{NO}^+ [\text{M}+\text{H}]^+$  Calcd 534.2039, Found 534.2037.

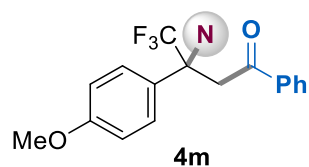

**4m:** 74.0 mg, light yellow oil, yield: 76%;

$^1\text{H}$  NMR (400 MHz, Chloroform-*d*)  $\delta$  7.76 – 7.79 (m, 2H), 7.68 – 7.71 (m, 2H), 7.49 – 7.57 (m, 1H), 7.32 – 7.44 (m, 7H), 7.09 – 7.13 (m, 1H), 6.93 – 6.97 (m, 2H), 6.83 – 6.87 (m, 2H), 6.62 – 6.73 (m, 2H), 4.05 (d,  $J = 16.6$  Hz, 1H), 3.83 (s, 3H), 3.02 (d,  $J = 16.6$  Hz, 1H) ppm;

$^{19}\text{F}$  NMR (375 MHz, Chloroform-*d*)  $\delta$  -75.9 ppm;

$^{13}\text{C}$  NMR (100 MHz, Chloroform-*d*)  $\delta$  194.3, 169.2, 159.5, 141.1, 138.1, 137.7, 133.3, 132.9, 130.4, 129.3, 129.1, 128.9, 128.5, 128.5, 128.4, 128.1, 128.0, 127.9, 127.8, 127.4, 126.4 (q,  $^1J_{\text{C-F}} = 284.7$  Hz), 113.4, 68.0 (q,  $^2J_{\text{C-F}} = 25.8$  Hz), 55.3, 38.4 ppm;

HRMS (ESI):  $\text{C}_{30}\text{H}_{25}\text{F}_3\text{NO}_2^+ [\text{M}+\text{H}]^+$  Calcd 488.1832, Found 488.1833.

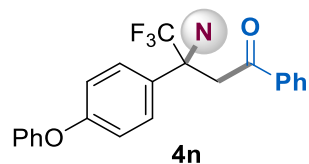

**4n:** 85.6 mg, light yellow oil, yield: 78%;

$^1\text{H}$  NMR (400 MHz, Chloroform-*d*)  $\delta$  7.77 – 7.79 (m, 2H), 7.68 – 7.71 (m, 2H), 7.50 – 7.54 (m, 1H), 7.31 – 7.44 (m, 9H), 7.11 – 7.16 (m, 2H), 6.93 – 7.07 (m, 6H), 6.65 – 6.79 (m, 2H), 4.05 (d,  $J = 16.6$  Hz, 1H), 3.83 (s, 3H), 3.02 (d,  $J = 16.6$  Hz, 1H) ppm;

$^{19}\text{F}$  NMR (375 MHz, Chloroform-*d*)  $\delta$  -75.7 ppm;

$^{13}\text{C}$  NMR (100 MHz, Chloroform-*d*)  $\delta$  194.3, 169.5, 157.4, 156.7, 141.0, 138.1, 137.6, 135.6, 133.0, 130.5, 129.9, 129.5, 128.9, 128.5, 128.2, 128.1, 128.0, 127.8, 127.5, 126.5 (q,  $^1J_{\text{C-F}} = 284.8$  Hz), 123.7, 119.2, 118.2, 68.2 (q,  $^2J_{\text{C-F}} = 25.8$  Hz), 38.5 ppm;

HRMS (ESI):  $\text{C}_{35}\text{H}_{27}\text{F}_3\text{NO}_2^+ [\text{M}+\text{H}]^+$  Calcd 550.1988, Found 550.1990.

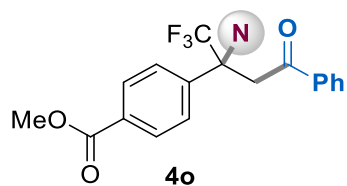

**4o:** 81.4 mg, light yellow solid, yield: 79%;

**m.p.** 155 – 156 °C;

**<sup>1</sup>H NMR** (400 MHz, Chloroform-*d*)  $\delta$  7.99 – 8.02 (m, 2H), 7.73 – 7.76 (m, 2H), 7.69 – 7.72 (m, 2H), 7.63 (d,  $J = 8.2$  Hz, 2H), 7.50 – 7.54 (m, 1H), 7.32 – 7.44 (m, 5H), 7.08 – 7.12 (m, 1H), 6.64 (t,  $J = 7.6$  Hz, 2H), 6.62 – 6.78 (m, 2H), 4.06 (d,  $J = 16.9$  Hz, 1H), 3.93 (s, 3H), 3.20 (d,  $J = 16.9$  Hz, 1H) ppm;

**<sup>19</sup>F NMR** (375 MHz, Chloroform-*d*)  $\delta$  -75.2 ppm;

**<sup>13</sup>C NMR** (100 MHz, Chloroform-*d*)  $\delta$  193.9, 169.8, 166.7, 145.9, 140.9, 137.8, 137.4, 133.1, 130.7, 130.0, 129.4, 129.0, 128.5, 128.3, 128.1, 127.9, 127.8, 127.7, 126.1 (q,  $^1J_{C-F} = 285.7$  Hz), 68.6 (q,  $^2J_{C-F} = 25.9$  Hz), 52.3, 38.7 ppm;

HRMS (ESI): C<sub>31</sub>H<sub>25</sub>F<sub>3</sub>NO<sub>3</sub><sup>+</sup> [M+H]<sup>+</sup> Calcd 516.1781, Found 516.1775.

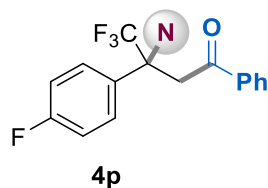

**4p:** 71.3 mg, light yellow oil, yield: 75%;

**<sup>1</sup>H NMR** (400 MHz, Chloroform-*d*)  $\delta$  7.75 – 7.77 (m, 2H), 7.68 – 7.71 (m, 2H), 7.46 – 7.54 (m, 4H), 7.27 – 7.43 (m, 9H), 7.10 – 7.14 (m, 1H), 6.95 – 7.04 (m, 4H), 6.63 – 6.76 (m, 2H), 4.03 (d,  $J = 16.7$  Hz, 1H), 3.12 (d,  $J = 16.7$  Hz, 1H) ppm;

**<sup>19</sup>F NMR** (375 MHz, Chloroform-*d*)  $\delta$  -75.7, -113.5 ppm;

**<sup>13</sup>C NMR** (100 MHz, Chloroform-*d*)  $\delta$  194.1, 169.6, 162.6 (d,  $^1J_{C-F} = 248.6$  Hz), 159.0, 140.9, 138.2, 137.9, 137.5, 136.9 (d,  $^4J_{C-F} = 3.3$  Hz), 135.6, 133.1, 130.6, 129.8 (d,  $^3J_{C-F} = 8.0$  Hz), 130.0, 129.4, 129.0, 128.7, 128.5, 128.2, 128.1, 128.0, 127.9, 127.7, 127.6, 127.5, 126.2 (q,  $^1J_{C-F} = 284.6$  Hz), 115.2 (d,  $^2J_{C-F} = 21.3$  Hz), 68.1 (q,  $^2J_{C-F} = 26.0$  Hz), 52.3, 38.7 ppm;

HRMS (ESI): C<sub>29</sub>H<sub>22</sub>F<sub>4</sub>NO<sup>+</sup> [M+H]<sup>+</sup> Calcd 476.1632, Found 476.1633.

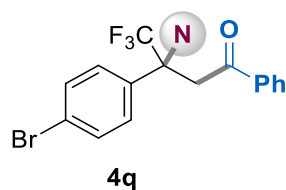

**4q:** 82.4 mg, light yellow oil, yield: 77%;

**<sup>1</sup>H NMR** (400 MHz, Chloroform-*d*)  $\delta$  7.72 – 7.74 (m, 2H), 7.67 – 7.69 (m, 2H), 7.26 – 7.54 (m, 10H), 7.10 – 7.14 (m, 1H), 6.98 (t,  $J = 7.6$  Hz, 1H), 6.62 – 6.78 (m, 2H), 3.99 (d,  $J = 16.9$  Hz, 1H), 3.15 (d,  $J = 16.9$  Hz, 1H) ppm;

**<sup>19</sup>F NMR** (375 MHz, Chloroform-*d*)  $\delta$  -75.4 ppm;

**<sup>13</sup>C NMR** (100 MHz, Chloroform-*d*)  $\delta$  193.9, 169.7, 159.1, 140.9, 140.1, 138.2, 137.8, 137.4, 135.5, 133.1, 131.4, 130.7, 129.7, 129.4, 129.0, 128.8, 128.5, 128.3, 128.1, 127.9, 127.6, 126.2 (q,  $^1J_{C-F} = 284.6$  Hz), 122.7, 68.3 (q,  $^2J_{C-F} = 25.6$  Hz), 38.6 ppm;

HRMS (ESI): C<sub>29</sub>H<sub>22</sub>BrF<sub>3</sub>NO<sup>+</sup> [M+H]<sup>+</sup> Calcd 536.0831, Found 536.083.

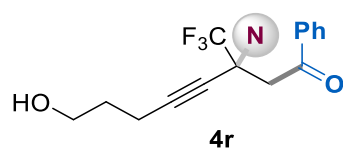

**4r**: 59.3 mg, light yellow oil, yield: 64%;

**<sup>1</sup>H NMR** (400 MHz, Chloroform-*d*)  $\delta$  7.93 – 7.94 (m, 2H), 7.48 – 7.53 (m, 3H), 7.33 – 7.41 (m, 6H), 7.25 – 7.28 (m, 4H), 3.99 (d,  $J = 14.9$  Hz, 1H), 3.53 (d,  $J = 14.9$  Hz, 1H), 3.39 – 3.49 (m, 2H), 1.68 – 1.77 (m, 2H), 1.31 – 1.36 (m, 2H) ppm;

**<sup>19</sup>F NMR** (375 MHz, Chloroform-*d*)  $\delta$  -77.6 ppm;

**<sup>13</sup>C NMR** (100 MHz, Chloroform-*d*)  $\delta$  194.9, 171.1, 140.6, 137.3, 136.3, 133.3, 132.5, 130.6, 130.1, 128.9, 128.8, 128.7, 128.6, 128.5, 128.4, 128.3, 127.9, 127.2, 124.5 (q,  $^1J_{C-F} = 284.2$  Hz), 92.8, 63.6 (q,  $^2J_{C-F} = 27.4$  Hz), 61.4, 45.4, 30.1, 15.4 ppm;

HRMS (ESI): C<sub>28</sub>H<sub>24</sub>F<sub>3</sub>NNaO<sub>2</sub><sup>+</sup> [M+Na]<sup>+</sup> Calcd 486.1651, Found 486.1651.

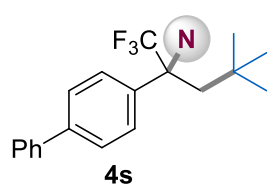

**4s**: 87.2 mg, light yellow oil, yield: 85%;

**<sup>1</sup>H NMR** (600 MHz, Chloroform-*d*)  $\delta$  7.58 – 7.63 (m, 4H), 7.43 – 7.62 (m, 6H), 7.31 – 7.40 (m, 4H), 7.14 – 7.17 (m, 1H), 7.03 (t,  $J = 7.6$  Hz, 2H), 6.62 (t,  $J = 7.5$  Hz, 2H), 2.38 (d,  $J = 15.0$  Hz, 1H), 2.08 (dd,  $J = 15.0, 2.0$  Hz, 1H) ppm;

**<sup>19</sup>F NMR** (565 MHz, Chloroform-*d*)  $\delta$  -71.8 ppm;

**<sup>13</sup>C NMR** (150 MHz, Chloroform-*d*)  $\delta$  167.4, 141.4, 141.3, 140.6, 140.4, 137.7, 130.3, 129.4, 128.9, 128.8, 128.1, 128.0, 127.8, 127.5, 127.1, 126.3, 69.4 (q,  $^2J_{C-F} = 26.5$  Hz), 44.8, 31.9, 31.4 ppm;

HRMS (ESI): C<sub>32</sub>H<sub>31</sub>F<sub>3</sub>N<sup>+</sup> [M+H]<sup>+</sup> Calcd 486.2403, Found 486.2464.

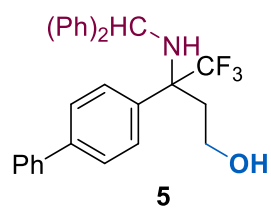

**5**: 79.3 mg, light yellow oil, yield: 86%;

**<sup>1</sup>H NMR** (400 MHz, Chloroform-*d*)  $\delta$  7.51 – 7.58 (m, 6H), 7.41 – 7.44 (m, 2H), 7.32 – 7.38 (m, 5H), 7.25 – 7.29 (m, 4H), 7.16 – 7.21 (m, 2H), 5.02(s, 1H), 3.39 – 3.52 (m, 2H), 2.32 – 2.39 (m, 1H), 2.18 – 2.24 (m, 1H) ppm;

**<sup>19</sup>F NMR** (375 MHz, Chloroform-*d*)  $\delta$  -71.0 ppm;

**<sup>13</sup>C NMR** (100 MHz, Chloroform-*d*)  $\delta$  145.6, 144.9, 141.0, 140.2, 135.5, 128.9, 128.8, 128.7, 128.1, 127.7, 127.1, 127.05, 127.03, 127.0 (q,  $^1J_{C-F}$  = 289.5 Hz), 126.9, 66.9 (q,  $^2J_{C-F}$  = 24.9 Hz), 61.7, 58.7, 37.6 ppm;

HRMS (ESI): C<sub>29</sub>H<sub>26</sub>F<sub>3</sub>NNaO<sub>2</sub><sup>+</sup> [M+Na]<sup>+</sup> Calcd 484.1859, Found 484.1858.

**<sup>1</sup>H NMR (400 MHz, CDCl<sub>3</sub>), <sup>13</sup>C NMR (100 MHz, CDCl<sub>3</sub>) spectrum of product 2a**

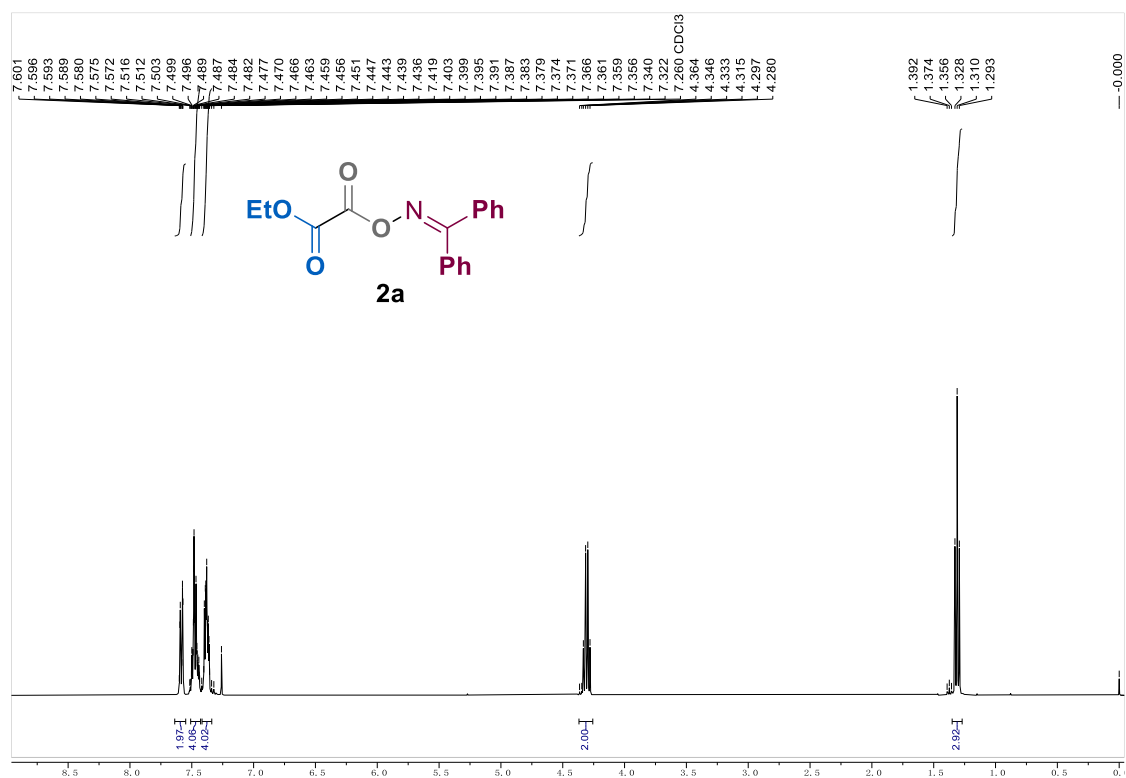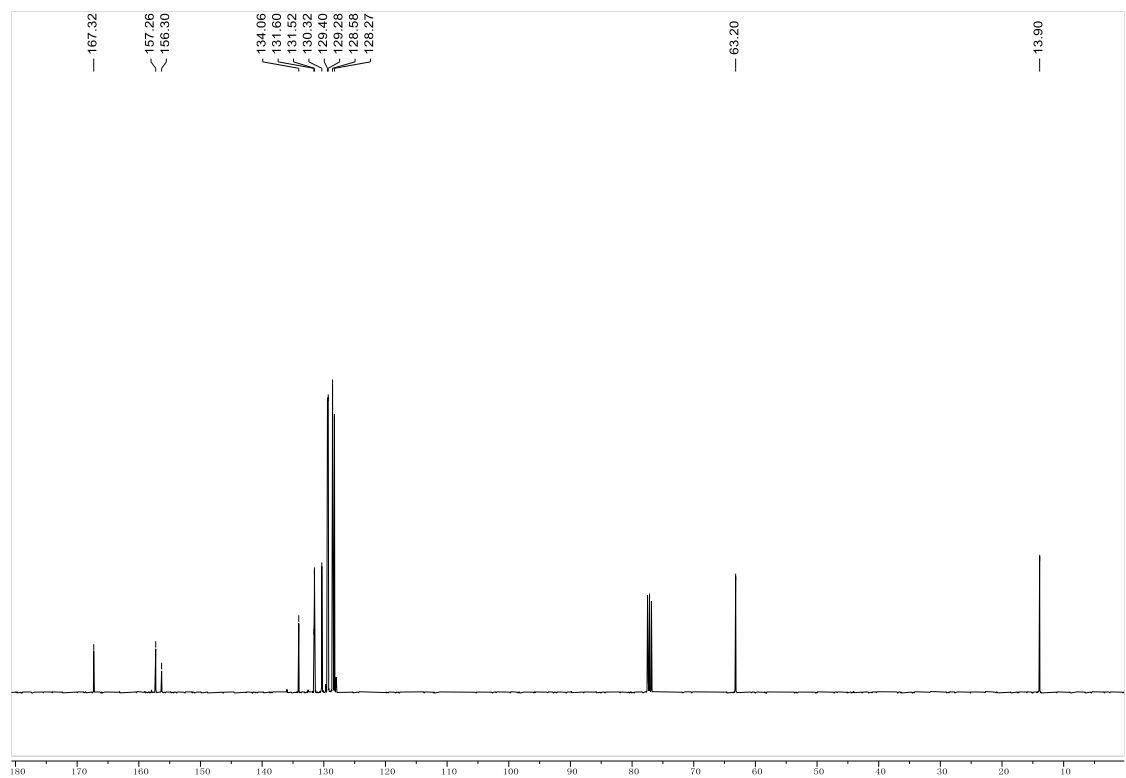

<sup>1</sup>H NMR (400 MHz, CDCl<sub>3</sub>), <sup>13</sup>C NMR (100 MHz, CDCl<sub>3</sub>) spectrum of product 2b

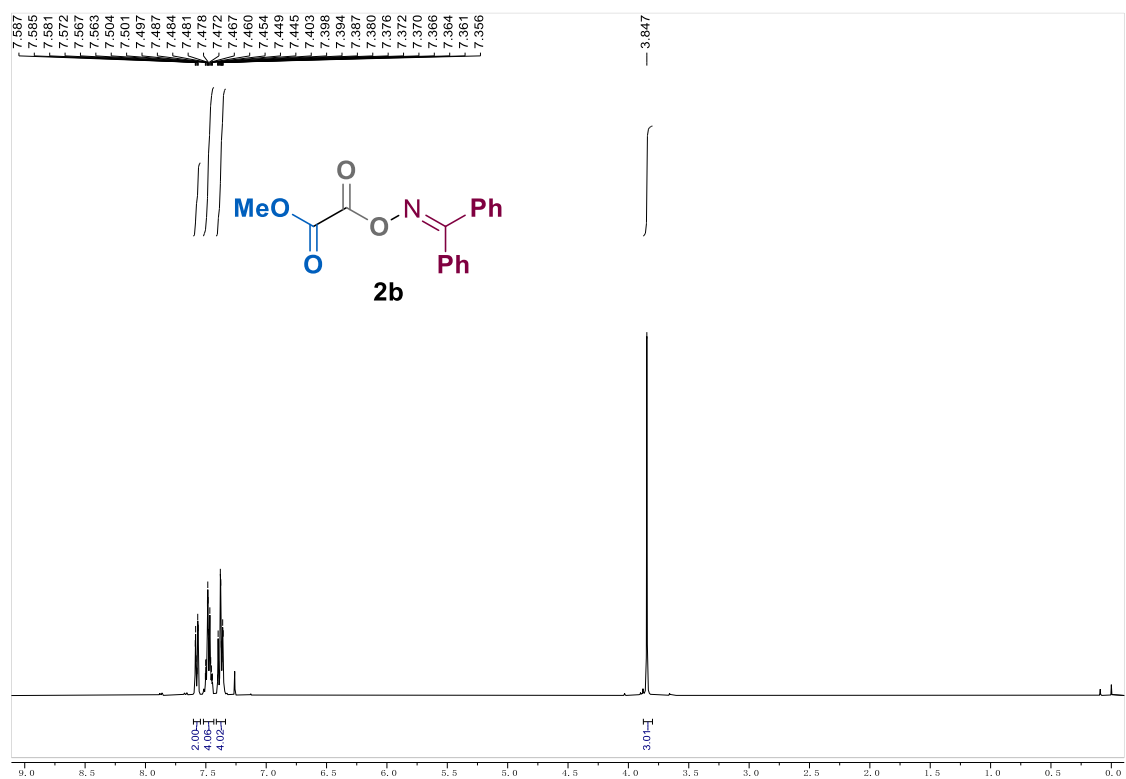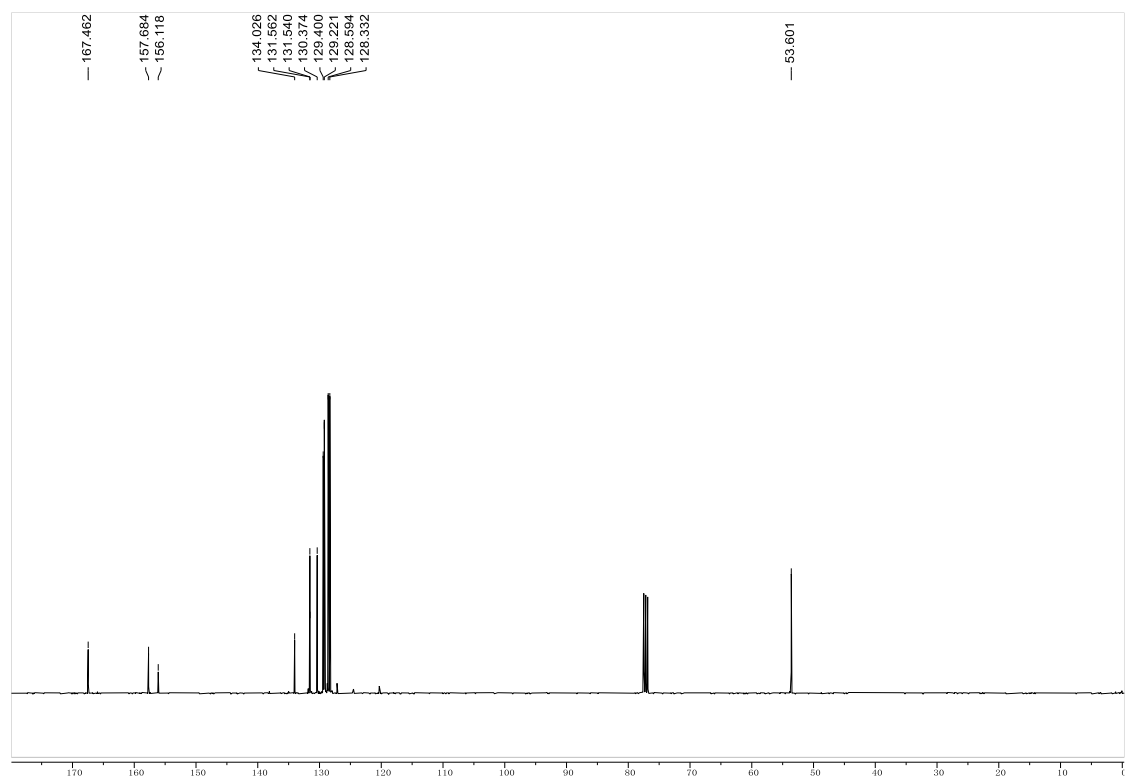



<sup>1</sup>H NMR (400 MHz, CDCl<sub>3</sub>), <sup>13</sup>C NMR (100 MHz, CDCl<sub>3</sub>) spectrum of product 2c

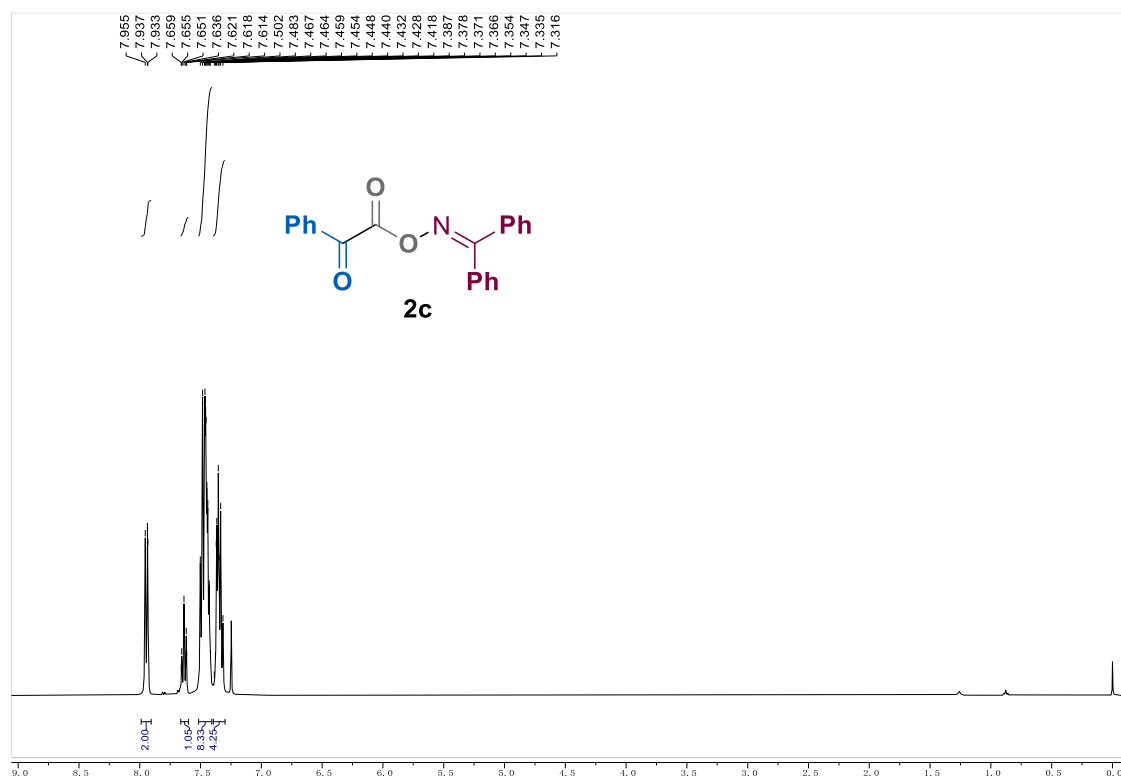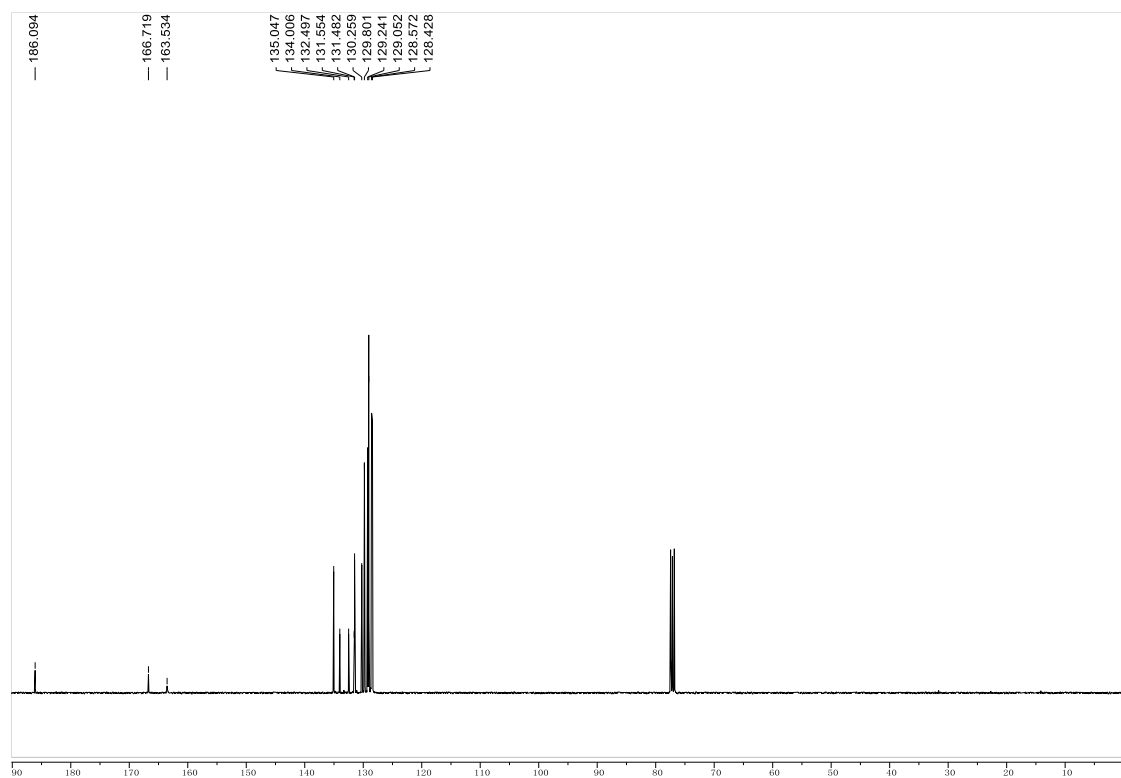

<sup>1</sup>H NMR (400 MHz, CDCl<sub>3</sub>), <sup>13</sup>C NMR (100 MHz, CDCl<sub>3</sub>) spectrum of product 2d

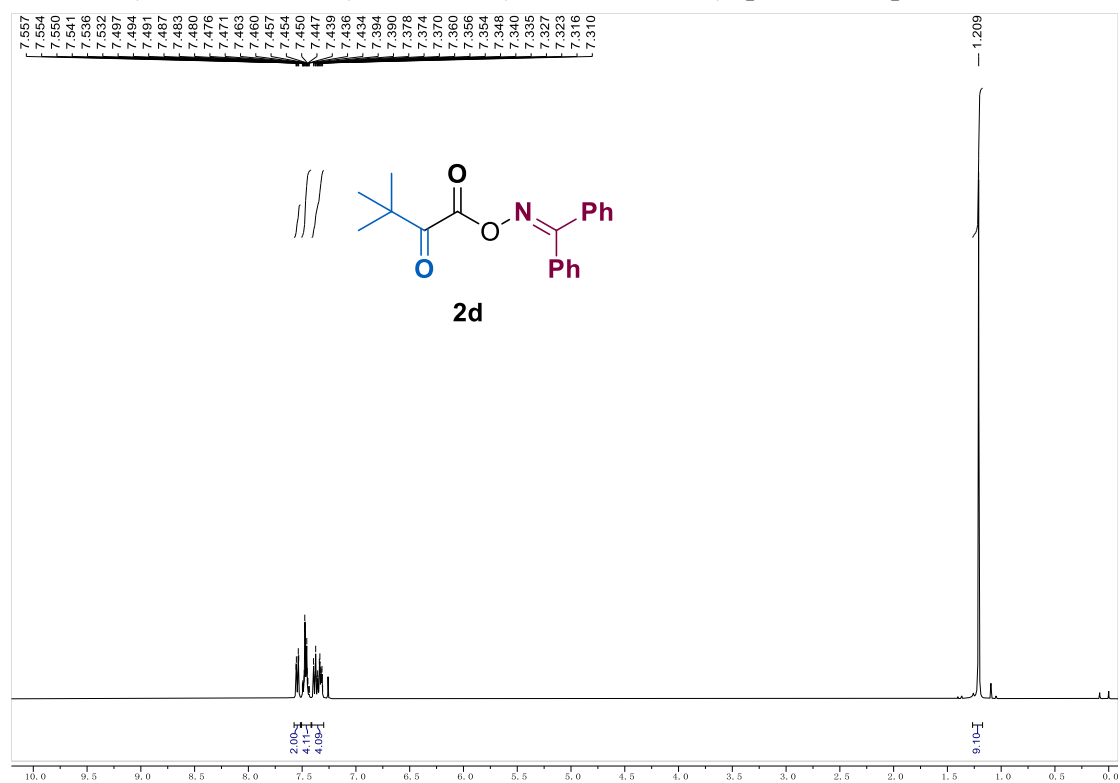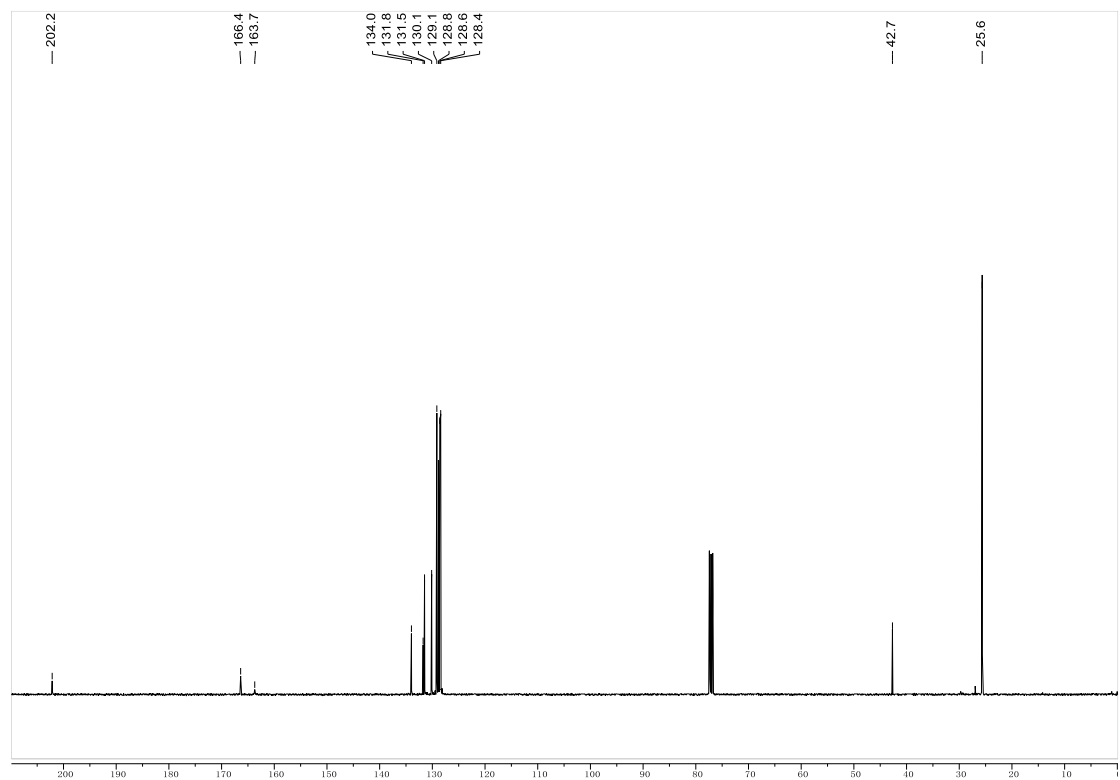

<sup>1</sup>H NMR (400 MHz, CDCl<sub>3</sub>), <sup>13</sup>C NMR (100 MHz, CDCl<sub>3</sub>) spectrum of product 3a

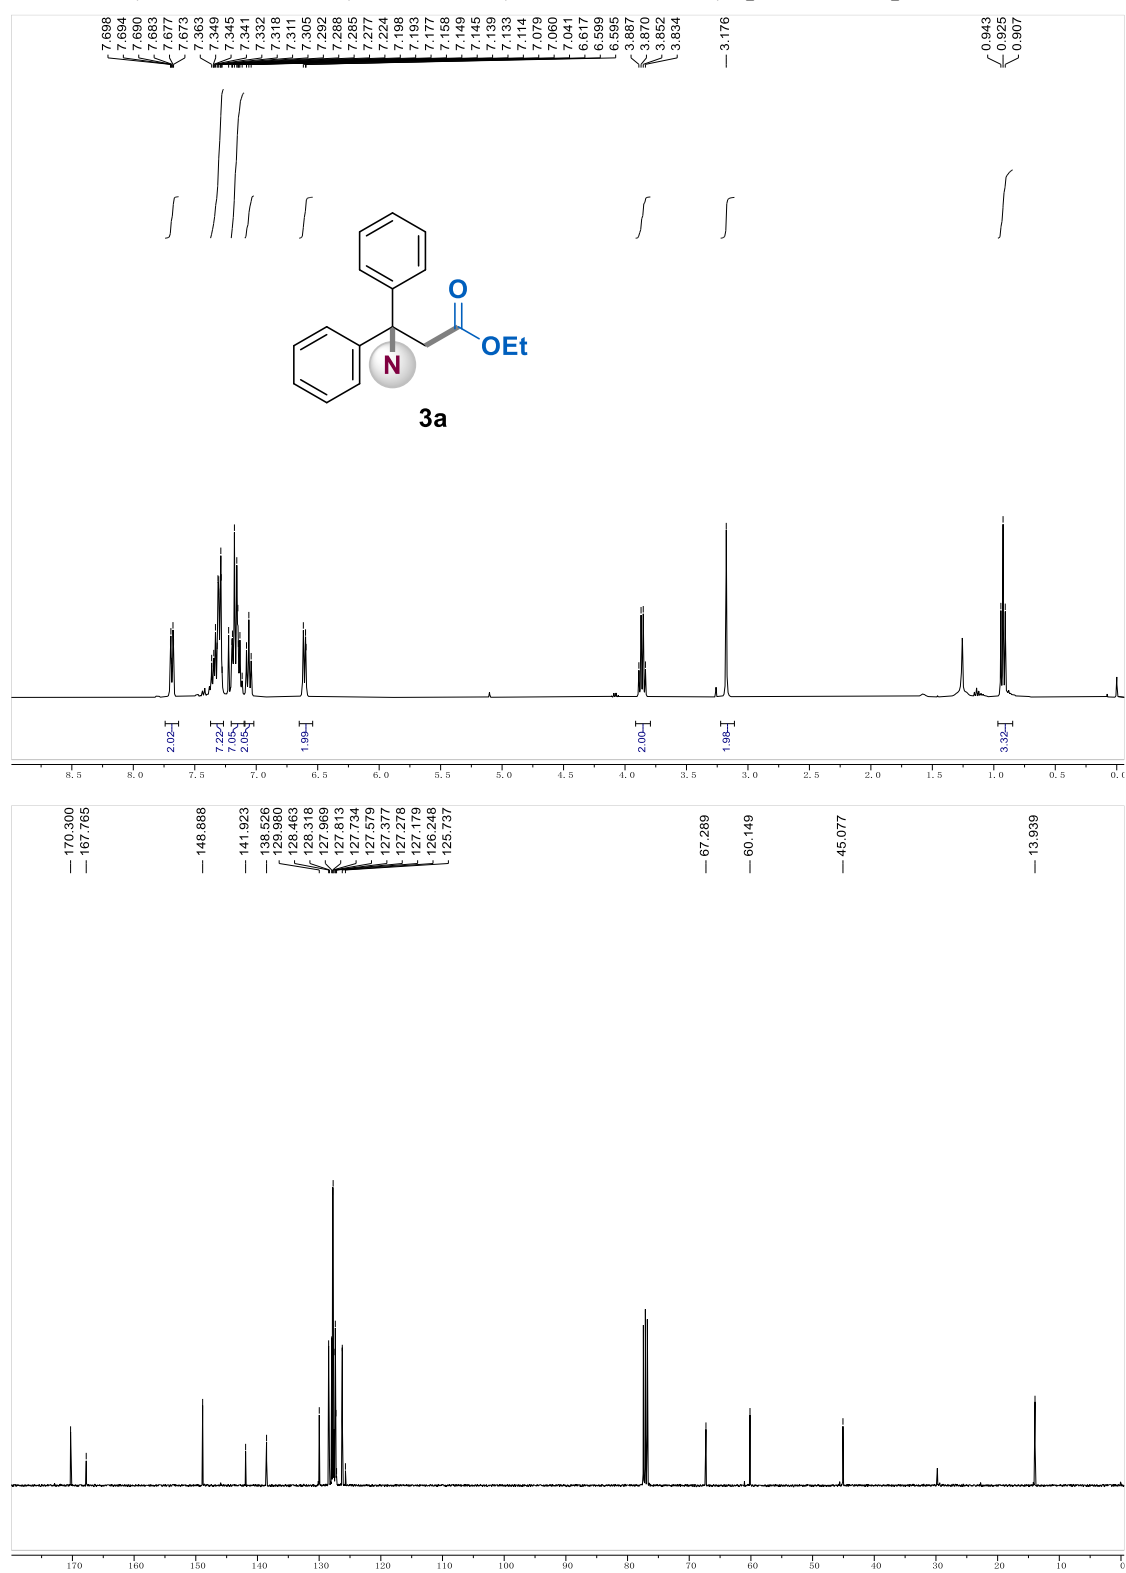

**$^1\text{H}$  NMR (600 MHz,  $\text{CDCl}_3$ ),  $^{13}\text{C}$  NMR (150 MHz,  $\text{CDCl}_3$ ) spectrum of product 3b**

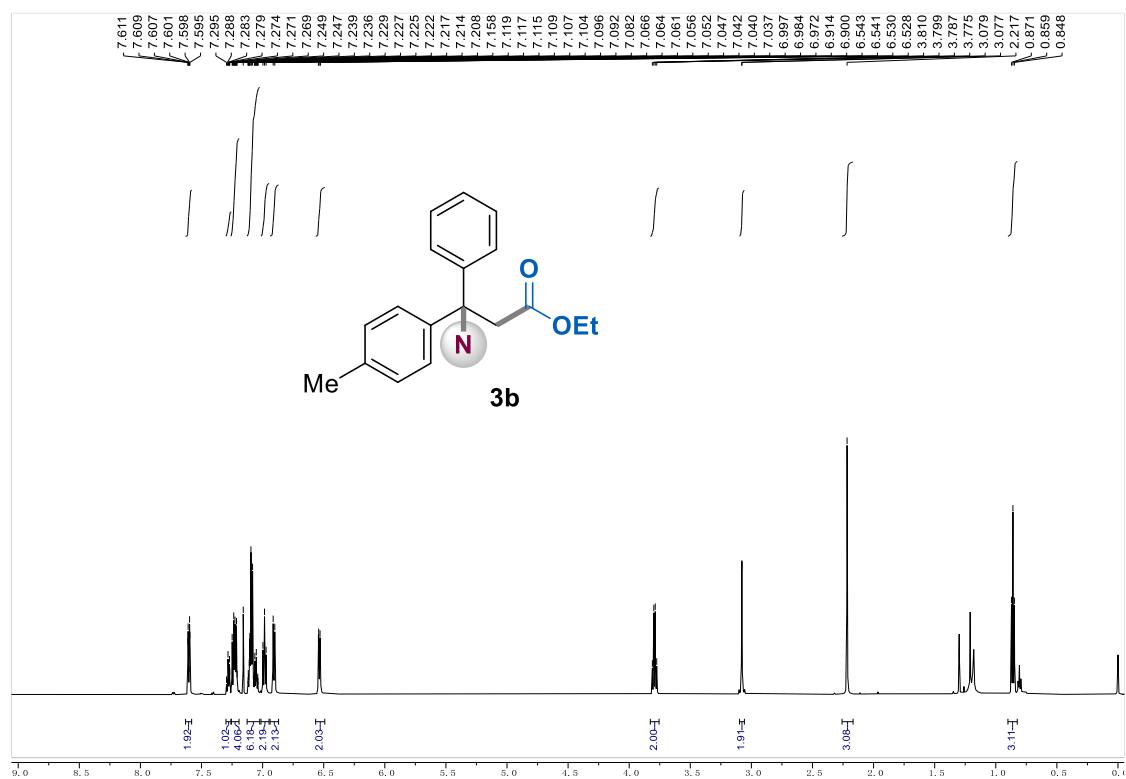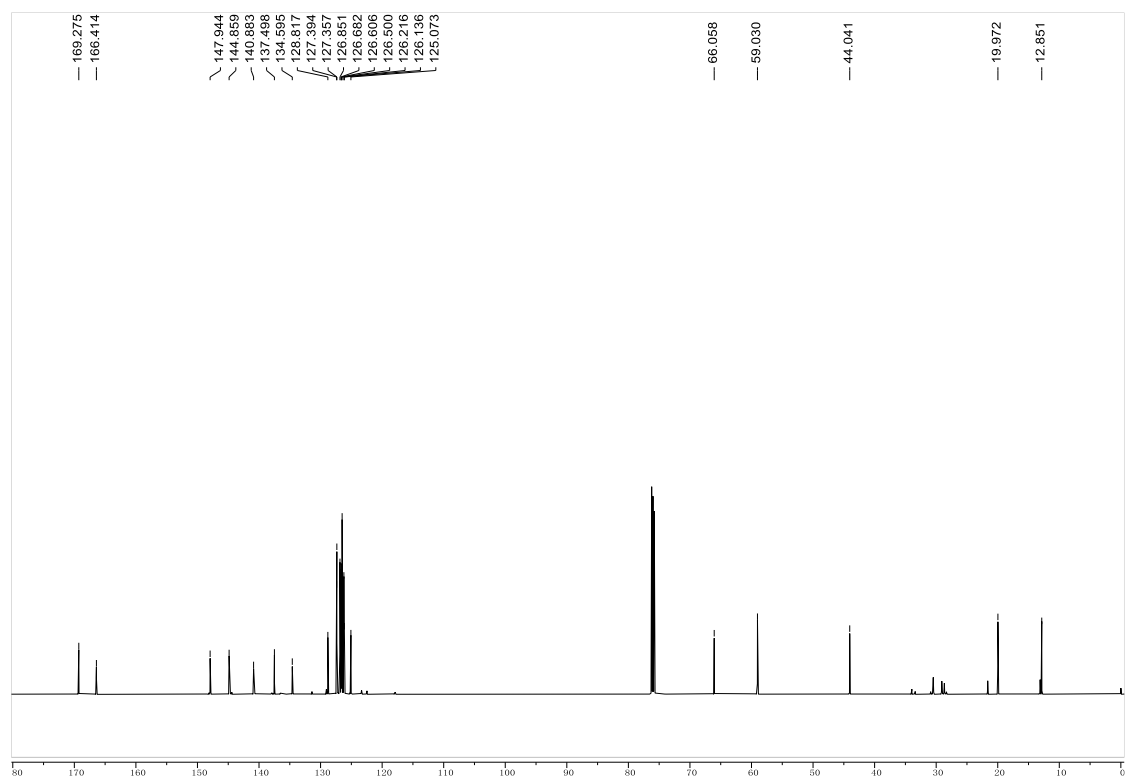

**$^1\text{H}$  NMR (400 MHz,  $\text{CDCl}_3$ ),  $^{13}\text{C}$  NMR (100 MHz,  $\text{CDCl}_3$ ) spectrum of product 3c**

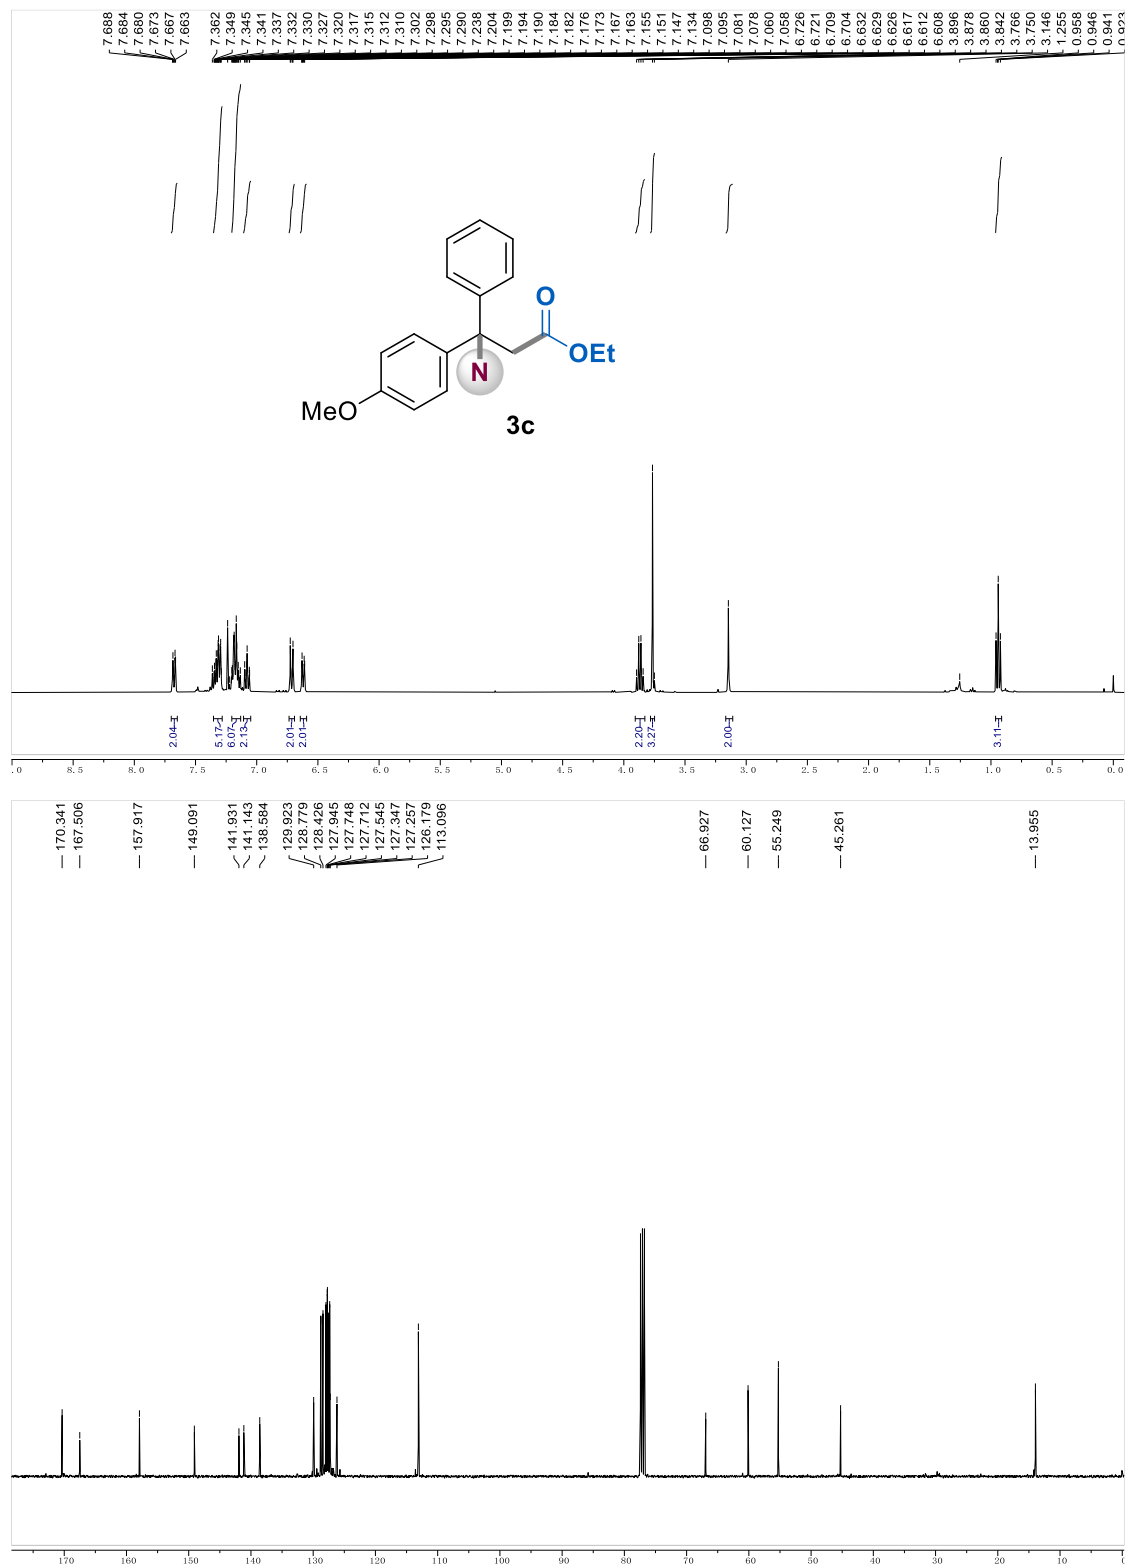

**<sup>1</sup>H NMR (600 MHz, CDCl<sub>3</sub>), <sup>19</sup>F NMR (565 MHz, CDCl<sub>3</sub>), <sup>13</sup>C NMR (150 MHz, CDCl<sub>3</sub>) spectrum of product 3d**

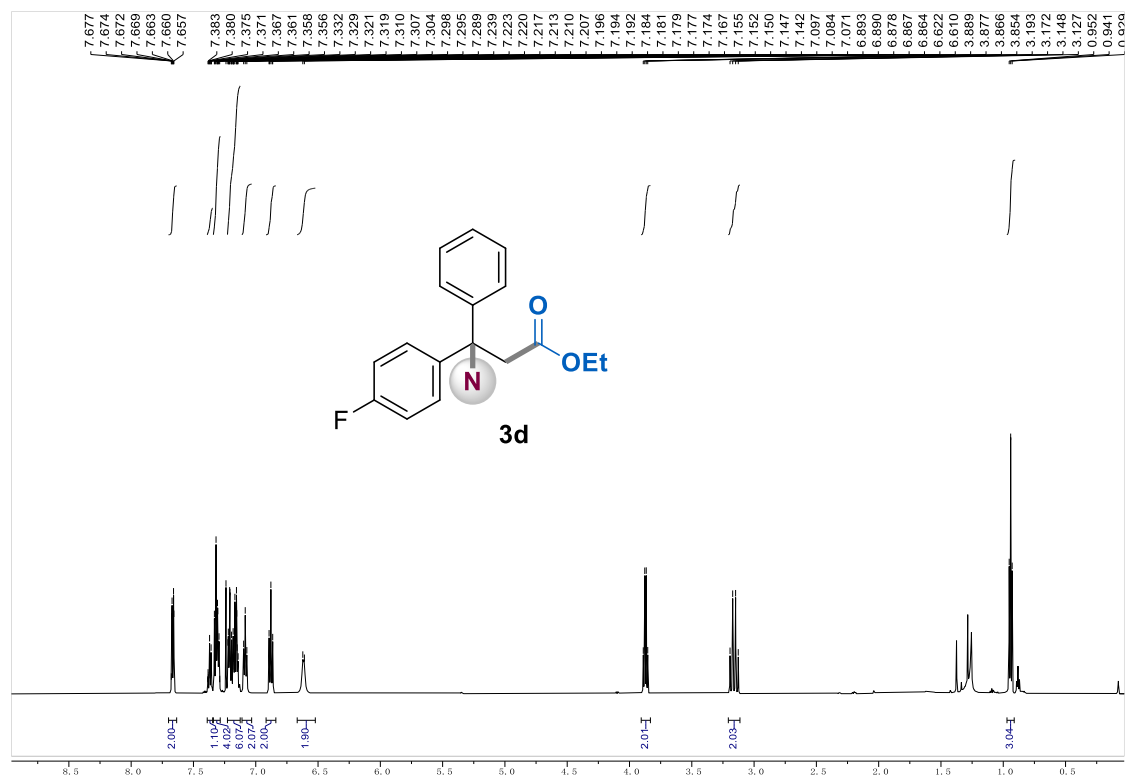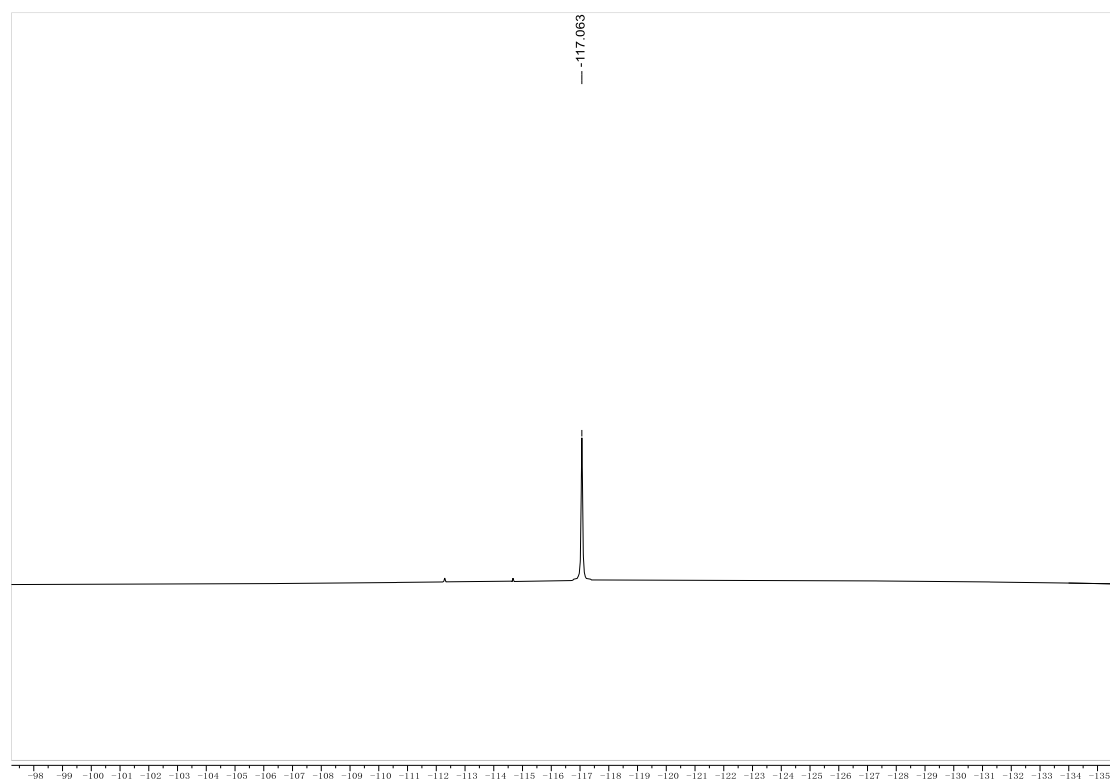

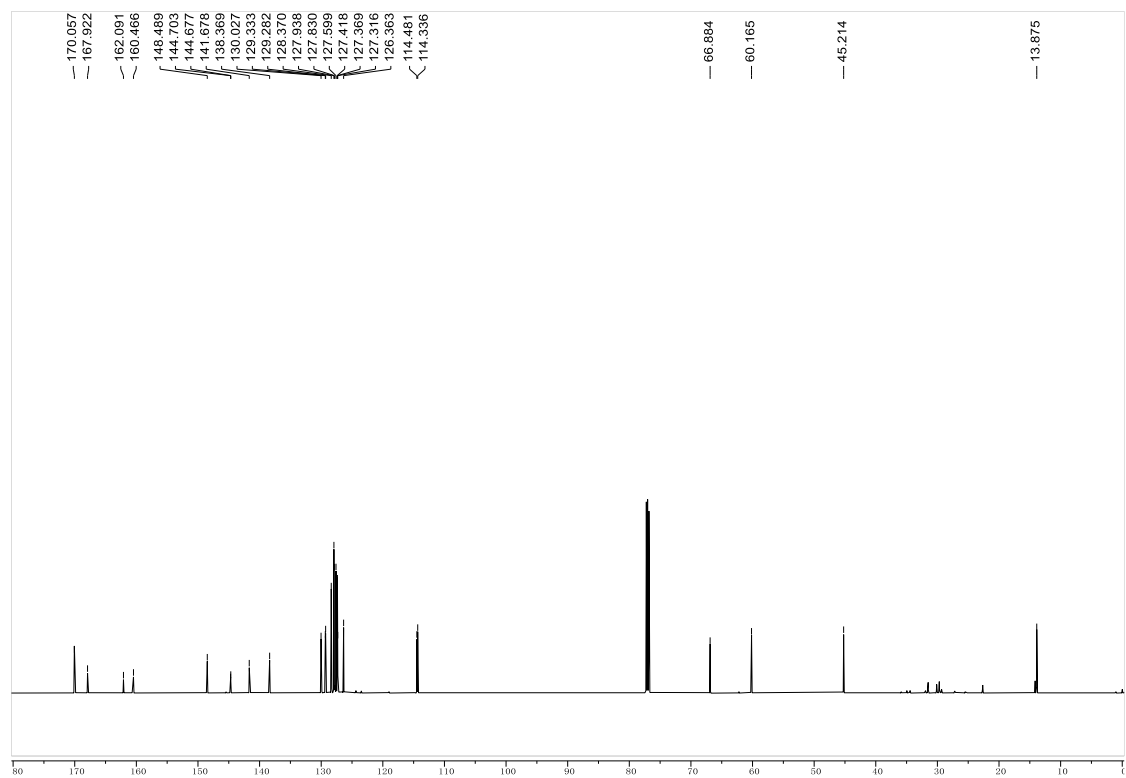

<sup>1</sup>H NMR (600 MHz, CDCl<sub>3</sub>), <sup>13</sup>C NMR (150 MHz, CDCl<sub>3</sub>) spectrum of product 3e

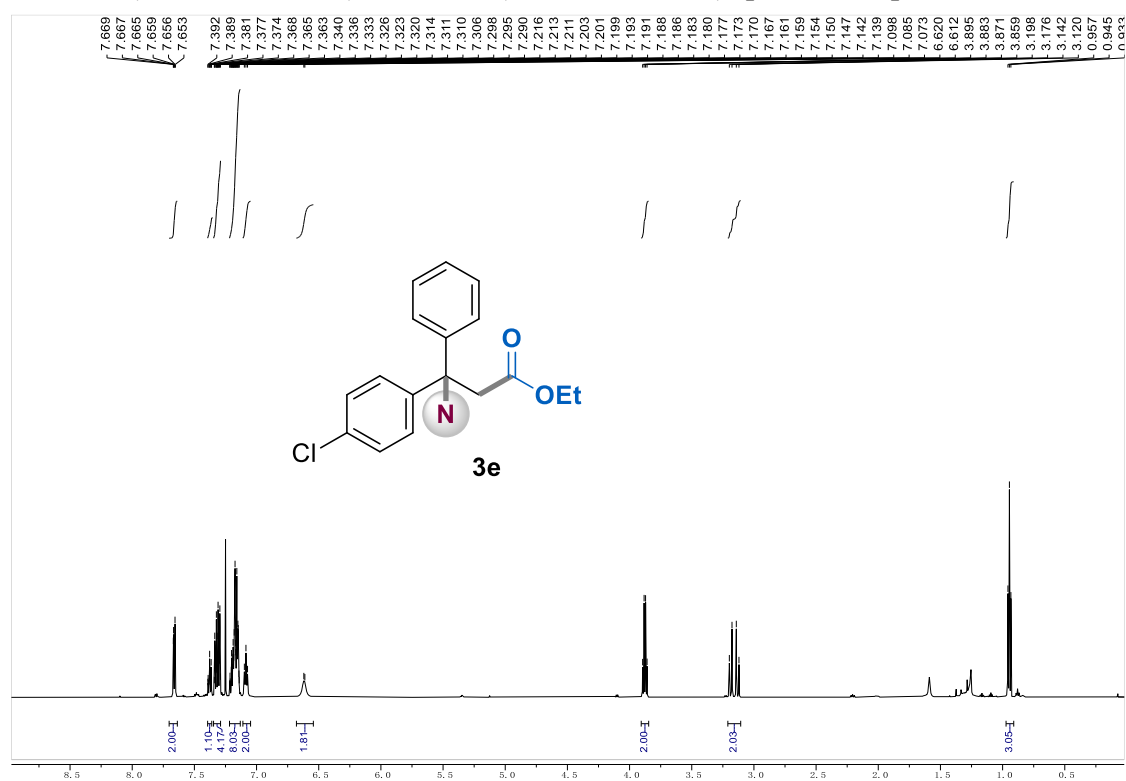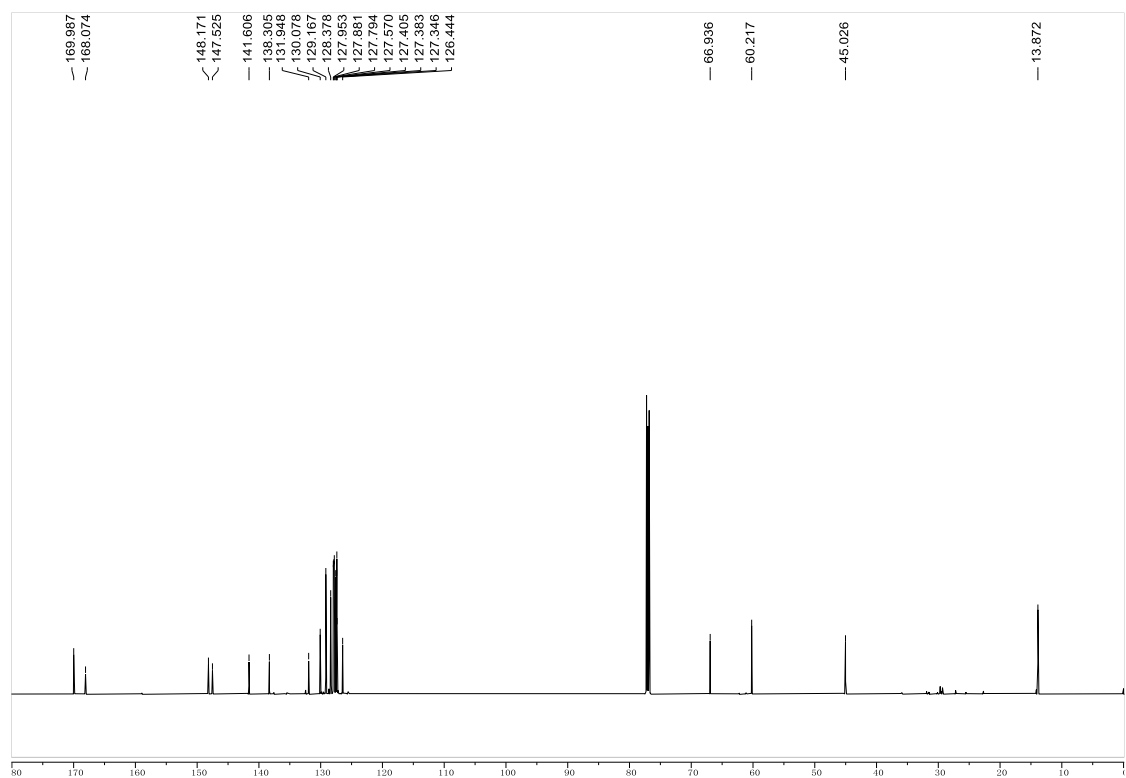



<sup>1</sup>H NMR (400 MHz, CDCl<sub>3</sub>), <sup>13</sup>C NMR (100 MHz, CDCl<sub>3</sub>) spectrum of product 3f

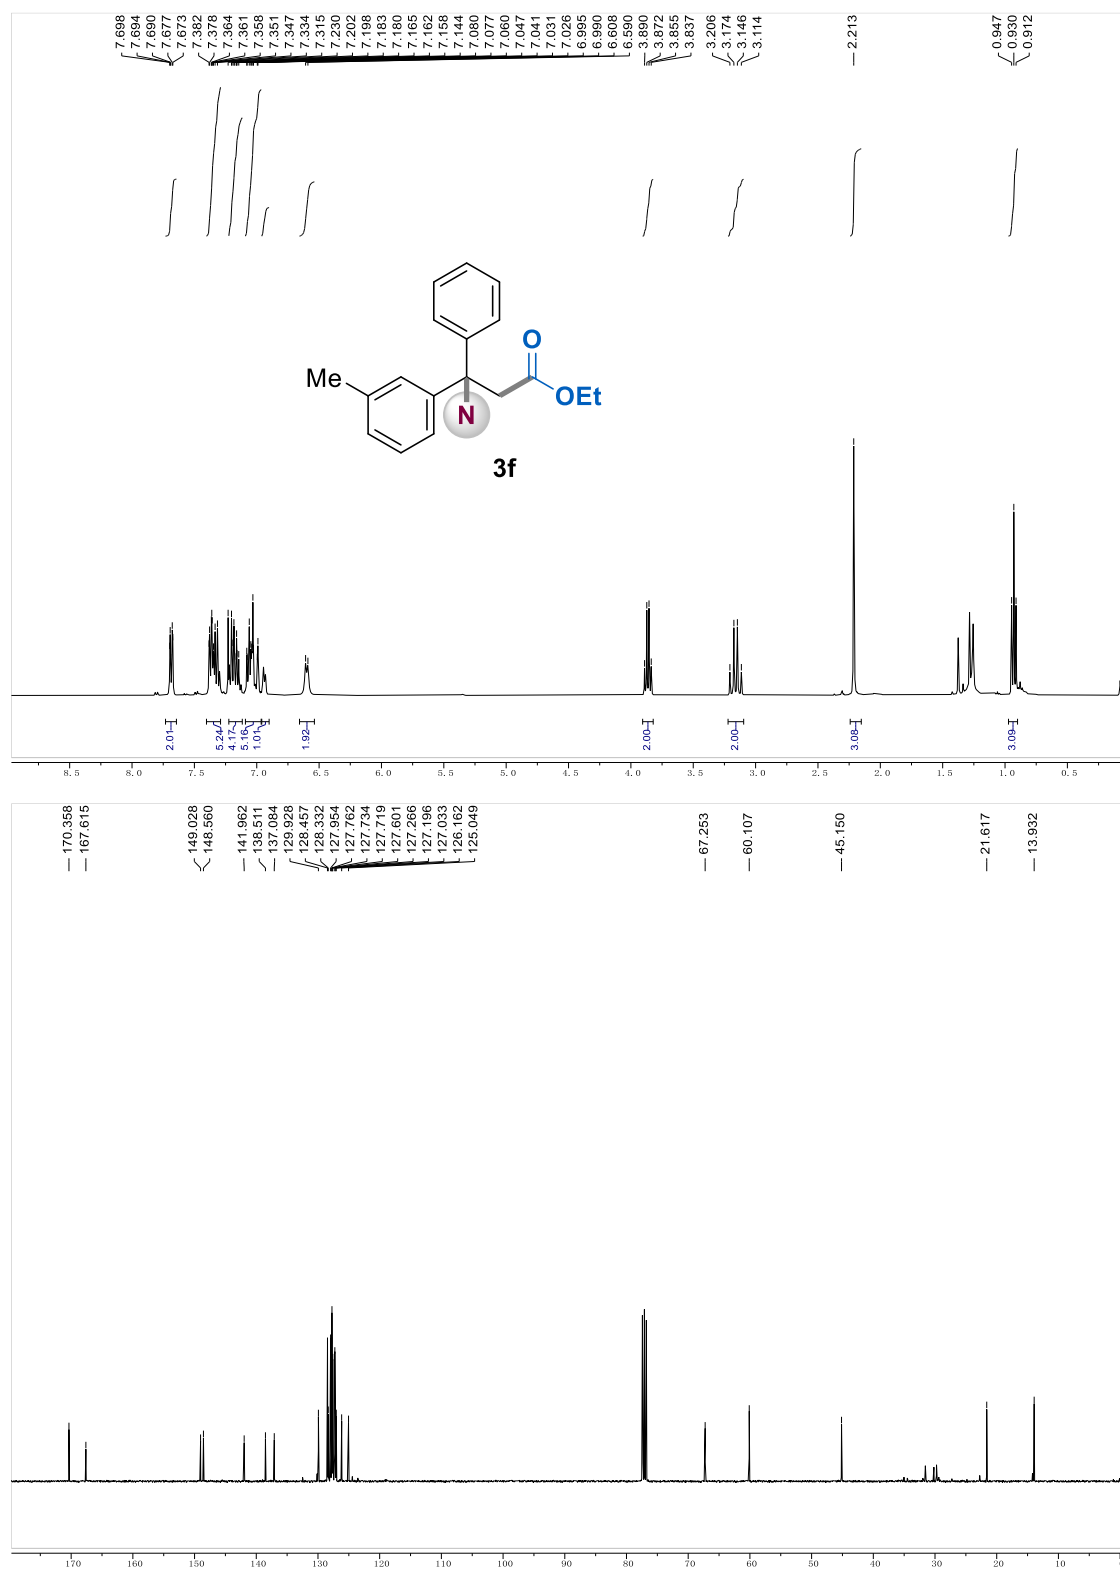

<sup>1</sup>H NMR (400 MHz, CDCl<sub>3</sub>), <sup>13</sup>C NMR (100 MHz, CDCl<sub>3</sub>) spectrum of product **3g**

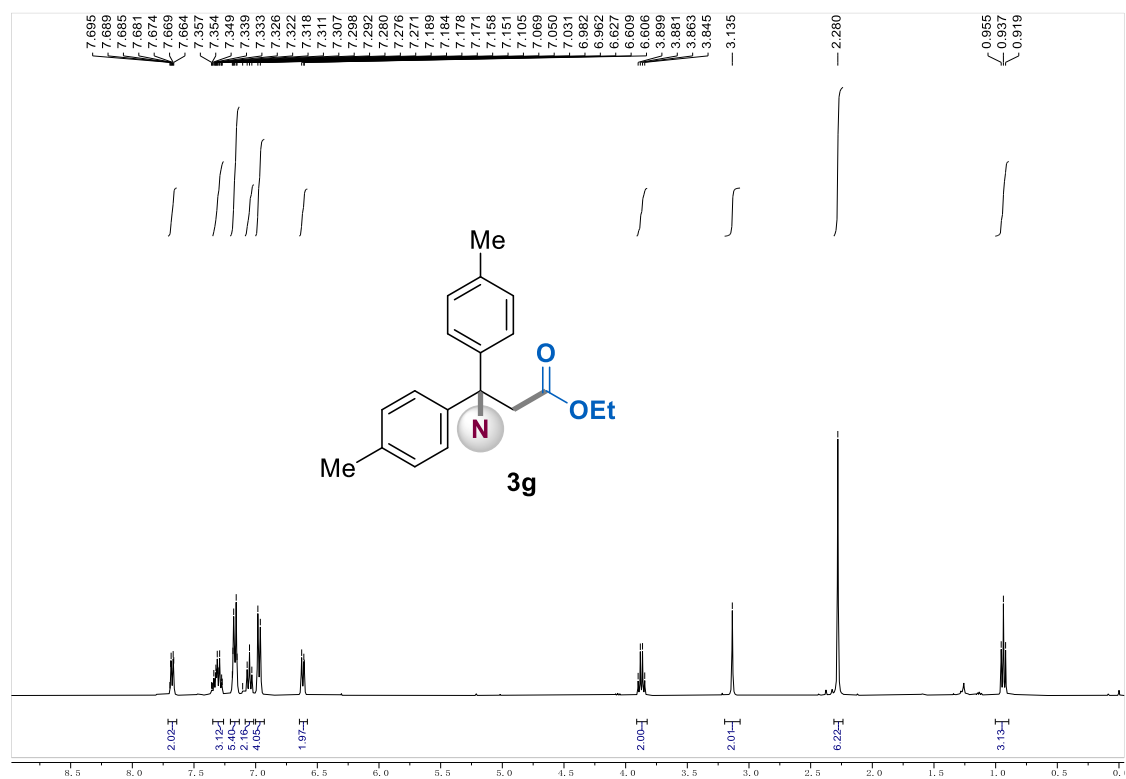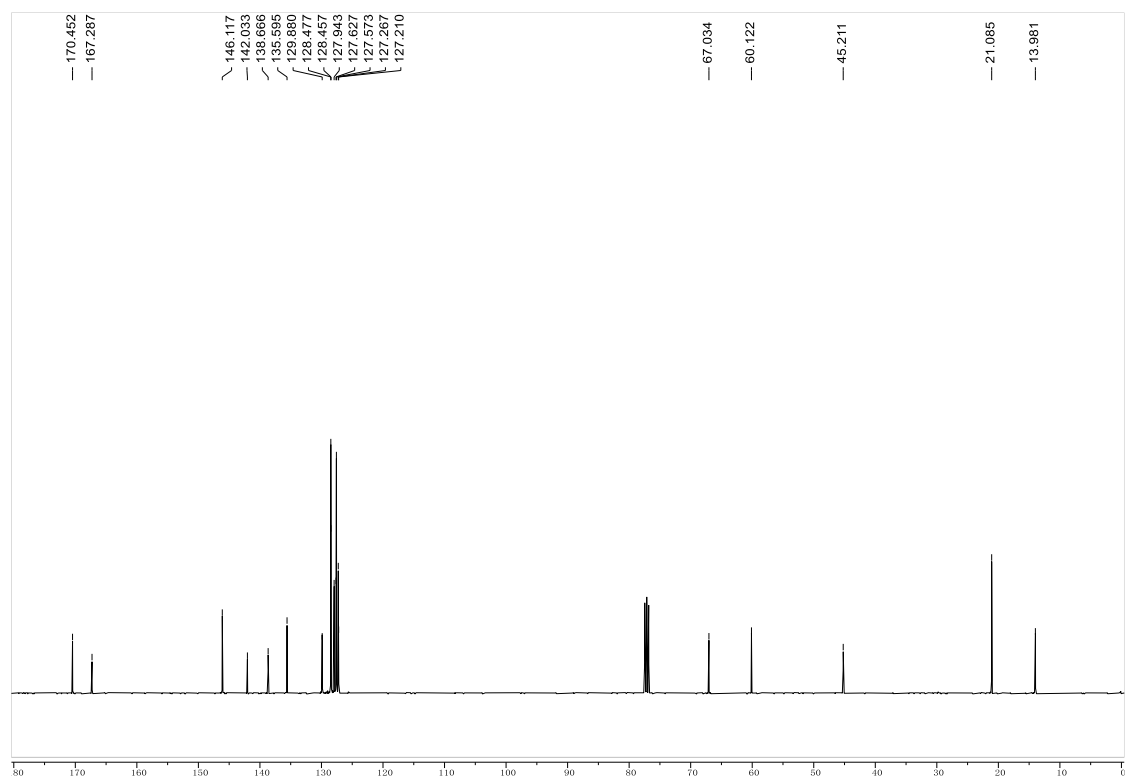

<sup>1</sup>H NMR (400 MHz, CDCl<sub>3</sub>), <sup>13</sup>C NMR (100 MHz, CDCl<sub>3</sub>) spectrum of product 3h

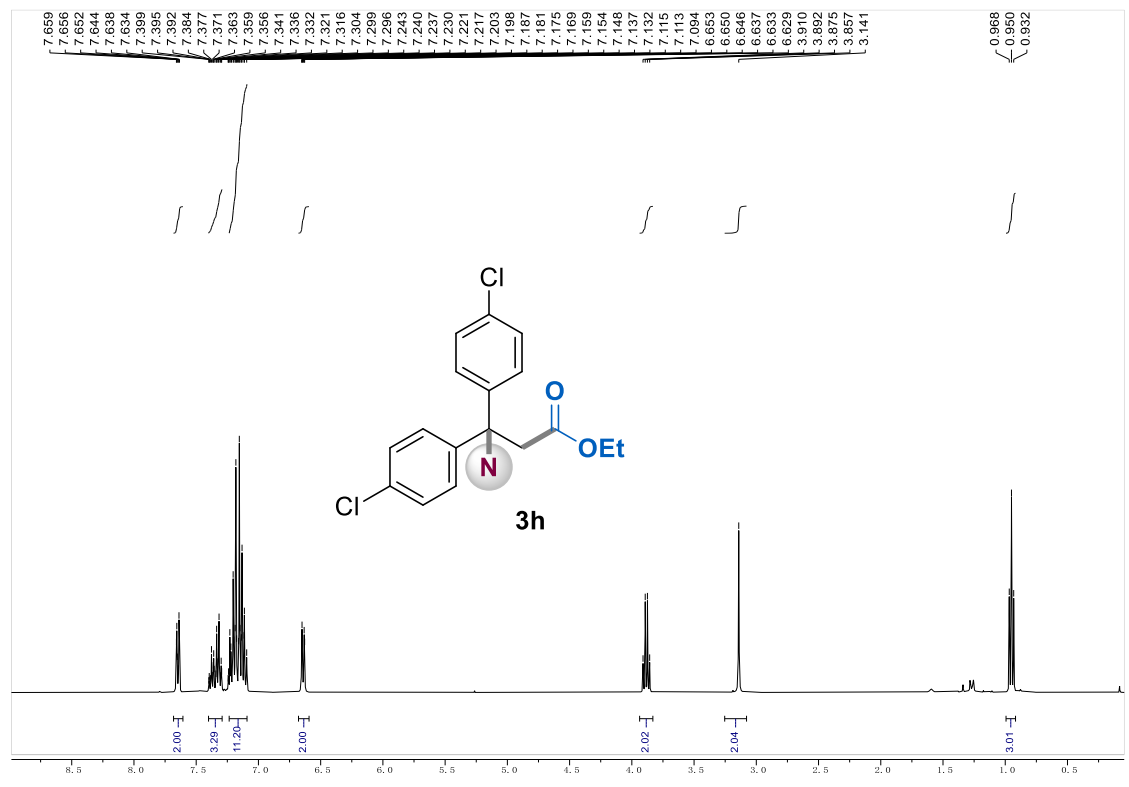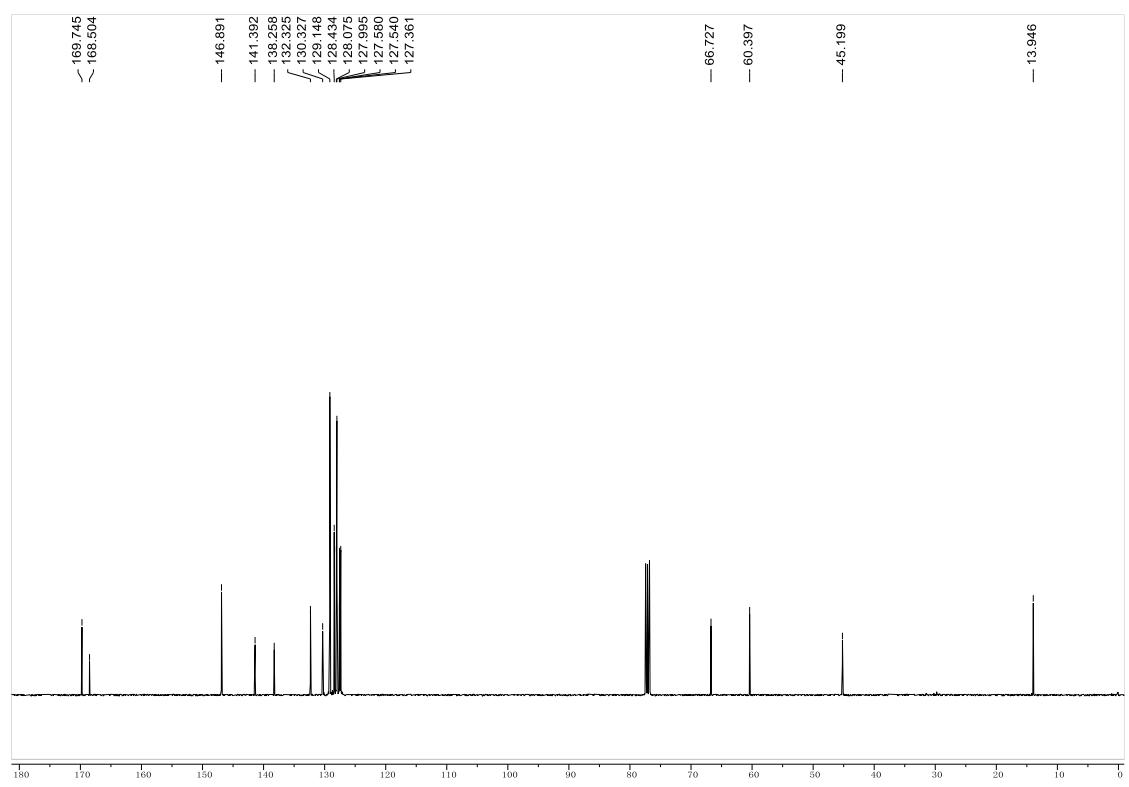

**<sup>1</sup>H NMR (400 MHz, CDCl<sub>3</sub>), <sup>19</sup>F NMR (565 MHz, CDCl<sub>3</sub>), <sup>13</sup>C NMR (100 MHz, CDCl<sub>3</sub>) spectrum of product 3i**

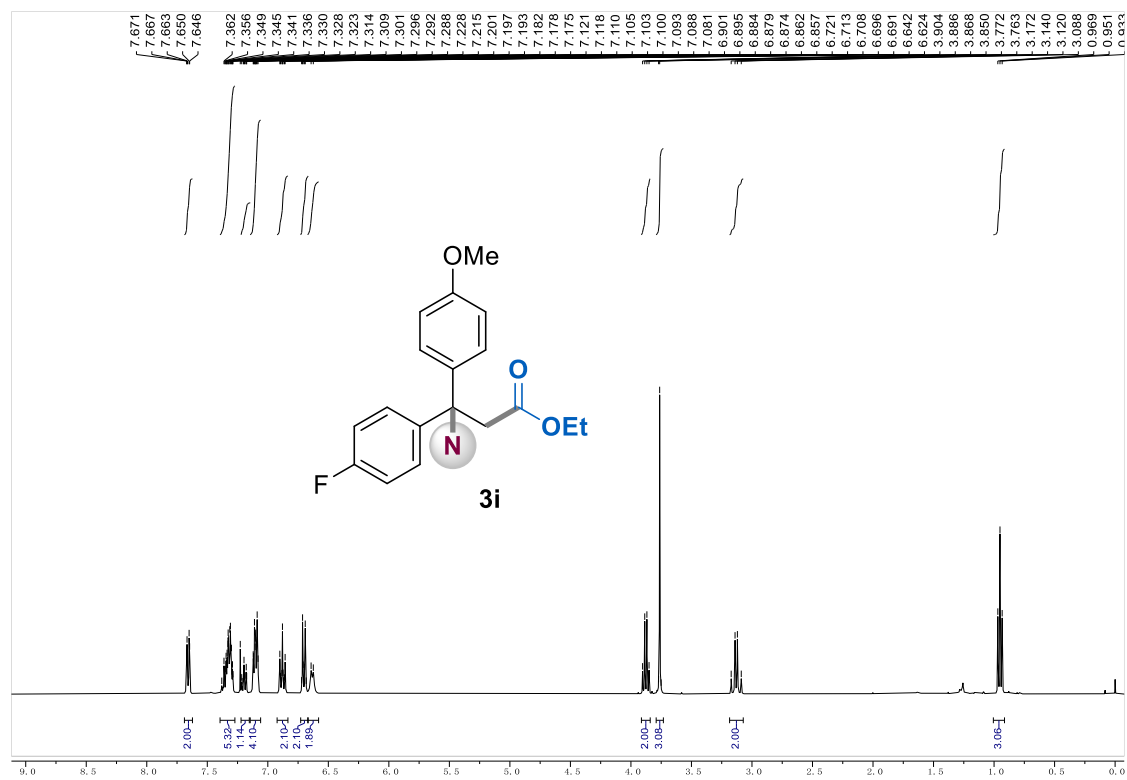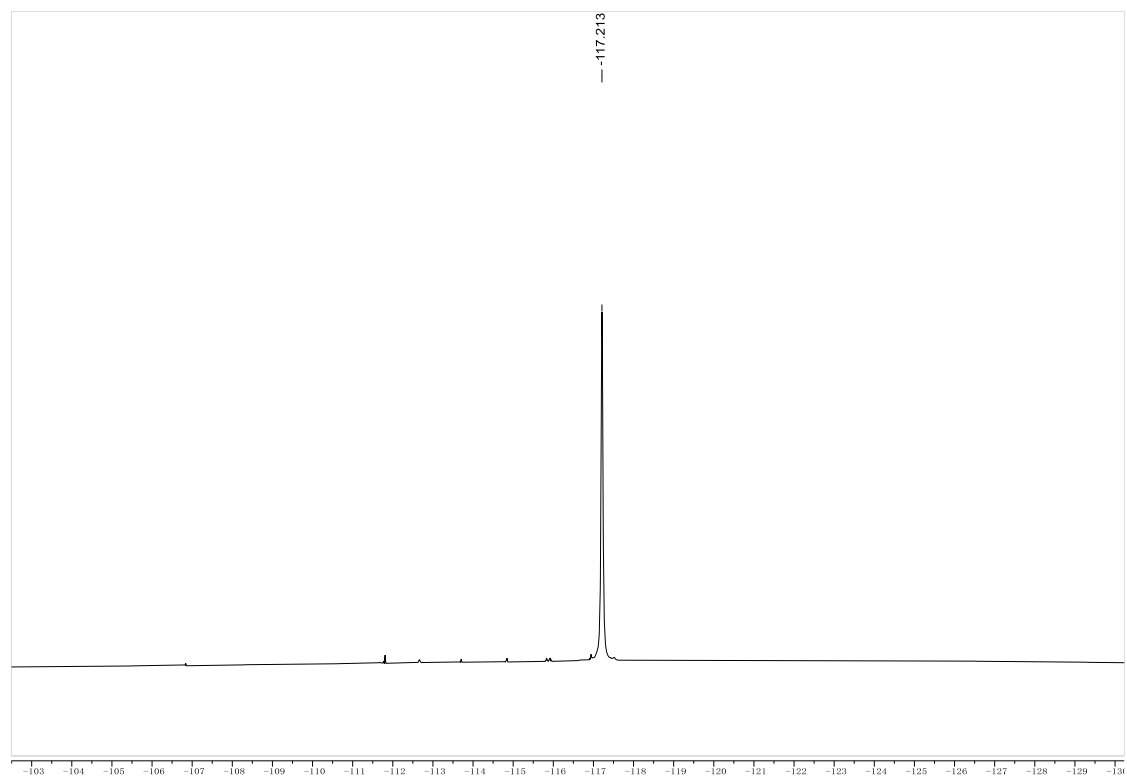

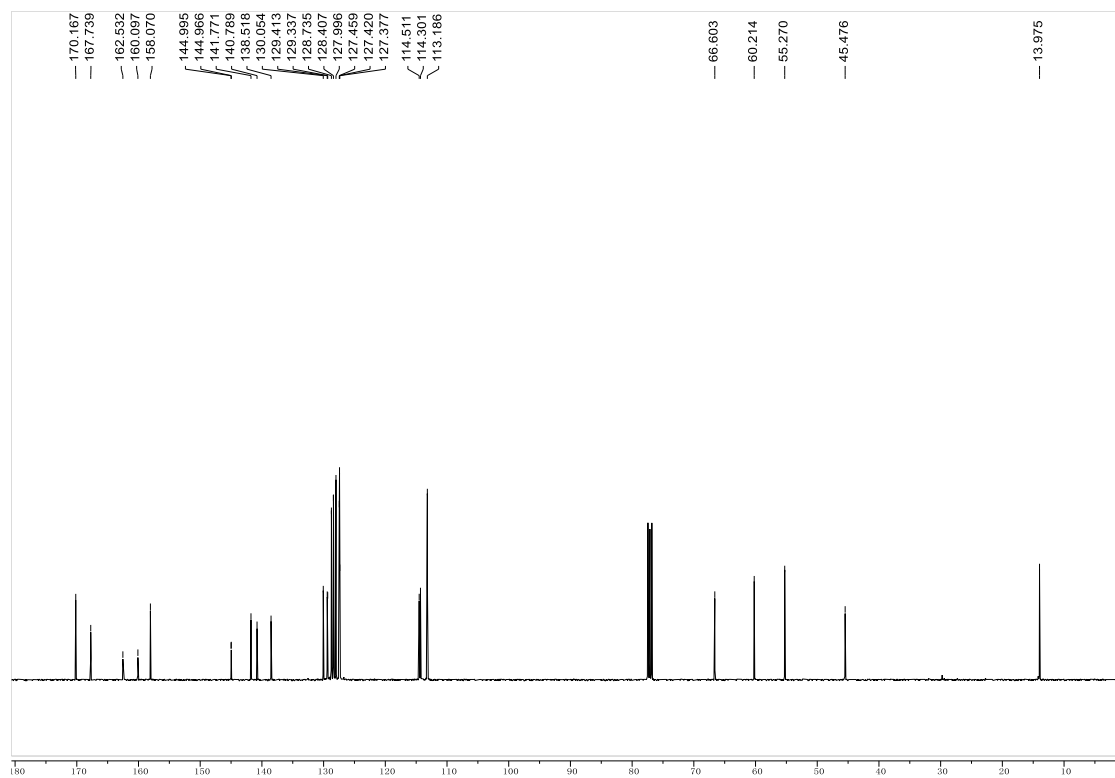

<sup>1</sup>H NMR (400 MHz, CDCl<sub>3</sub>), <sup>13</sup>C NMR (100 MHz, CDCl<sub>3</sub>) spectrum of product 3j

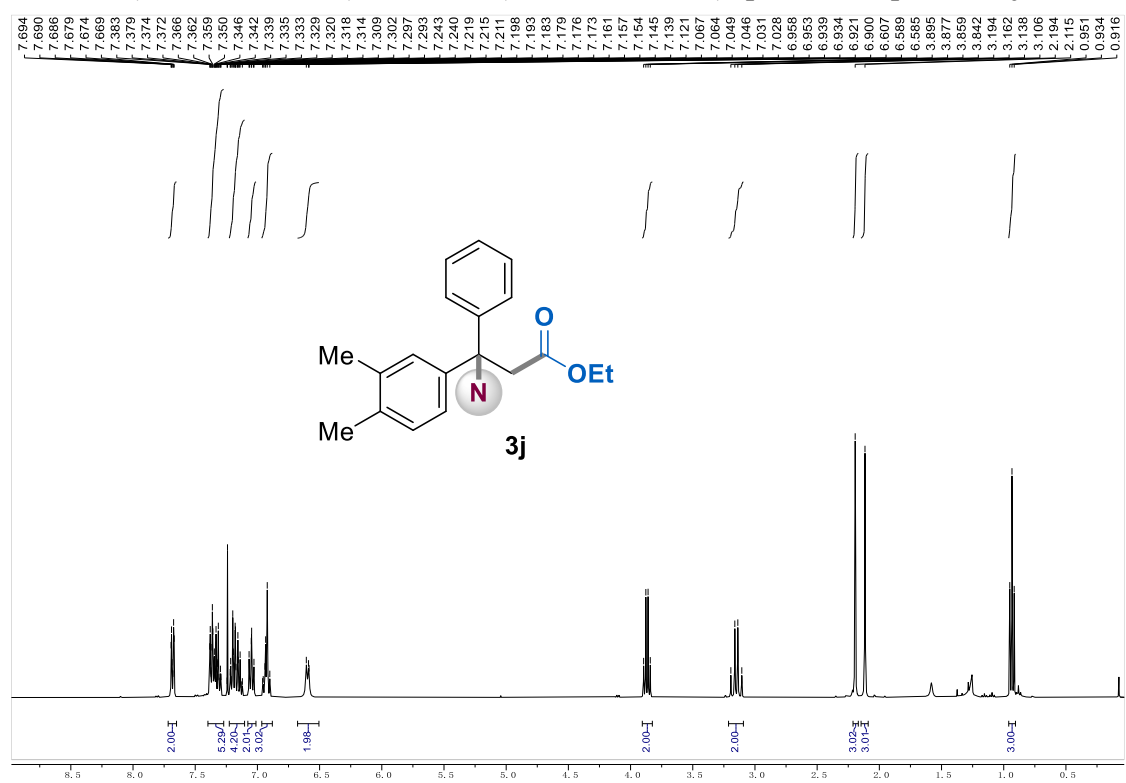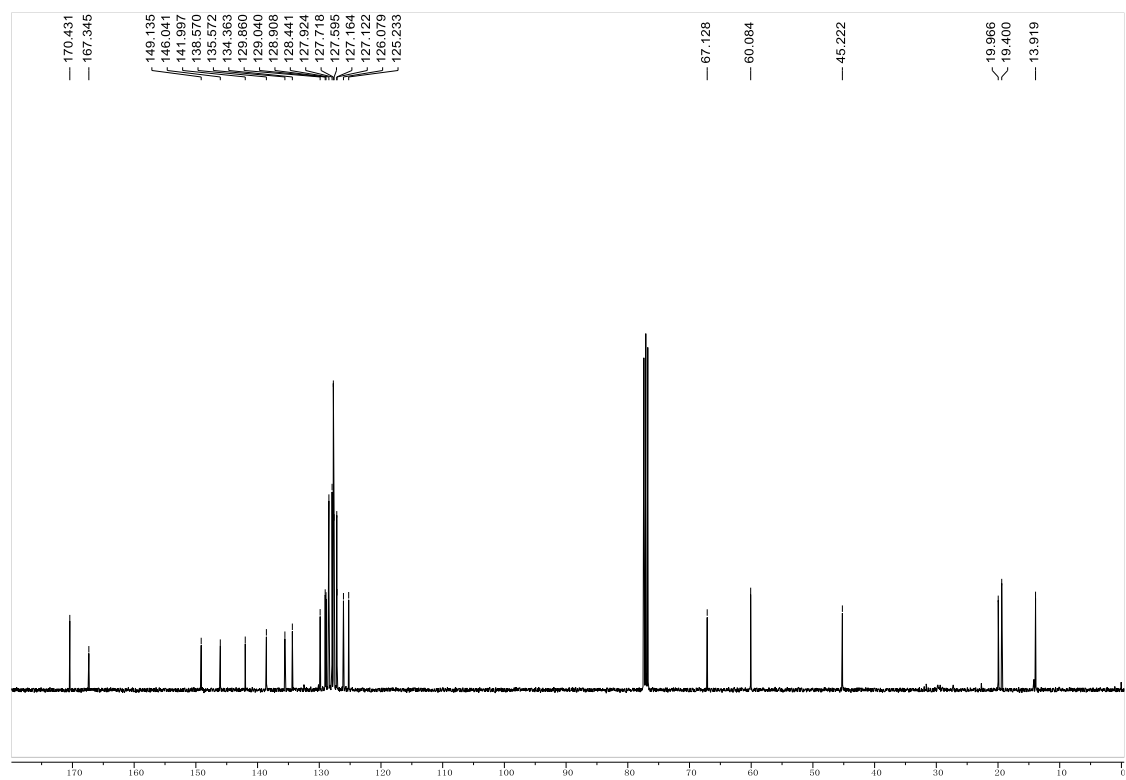

<sup>1</sup>H NMR (400 MHz, CDCl<sub>3</sub>), <sup>13</sup>C NMR (100 MHz, CDCl<sub>3</sub>) spectrum of product 3k

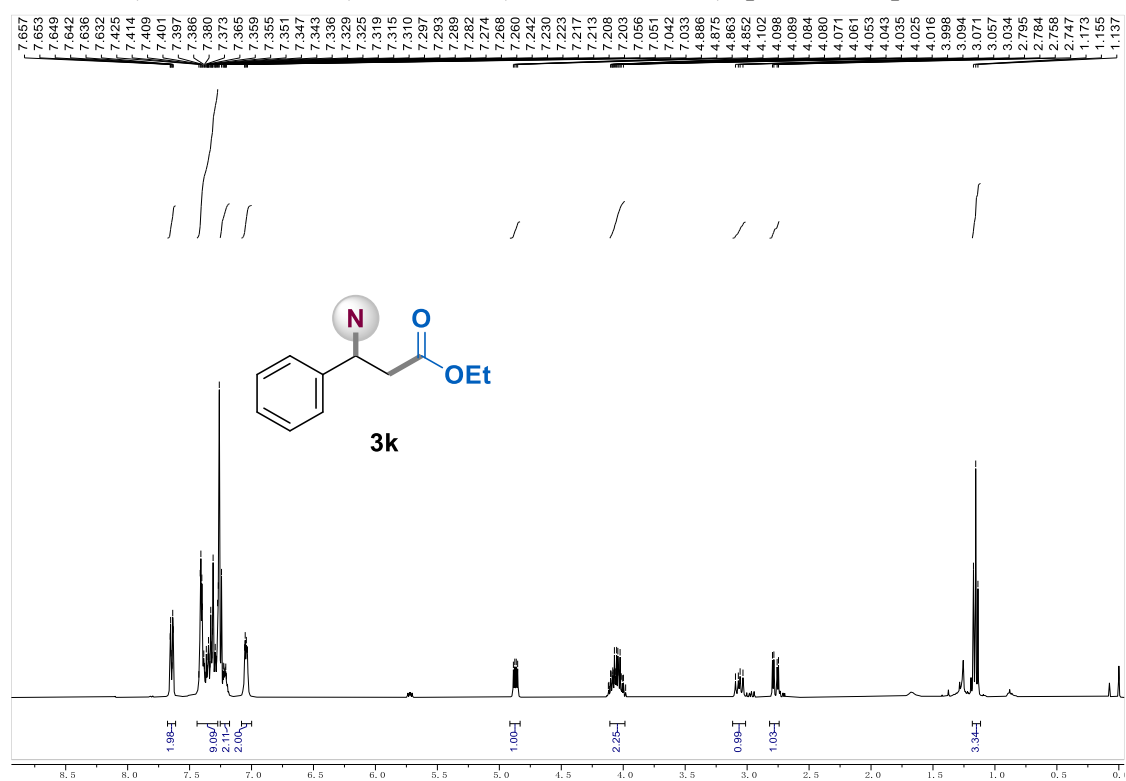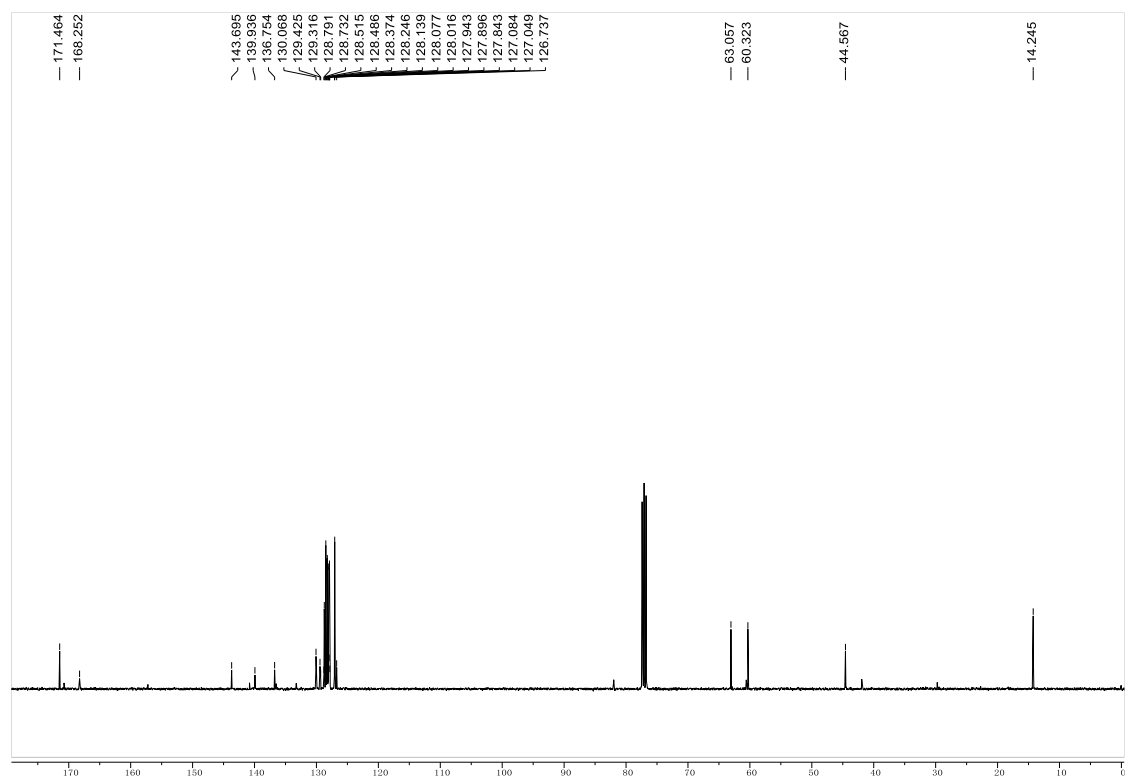

**<sup>1</sup>H NMR (400 MHz, CDCl<sub>3</sub>), <sup>13</sup>C NMR (100 MHz, CDCl<sub>3</sub>) spectrum of product 3I**

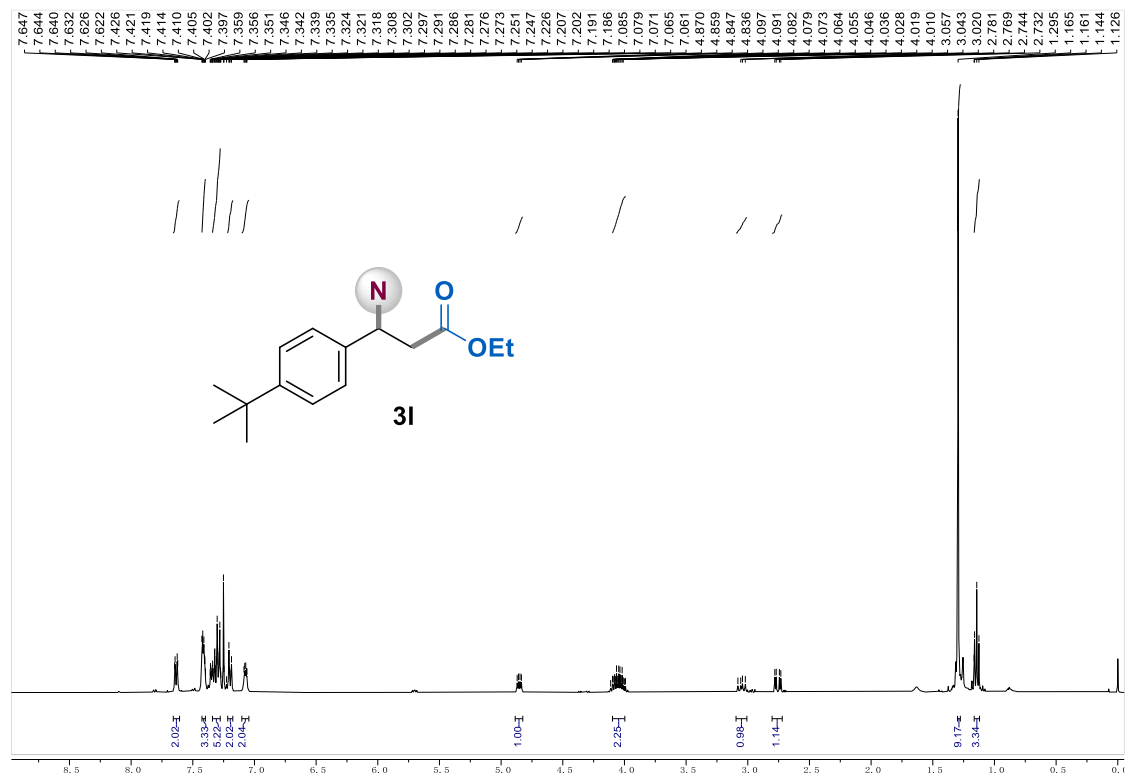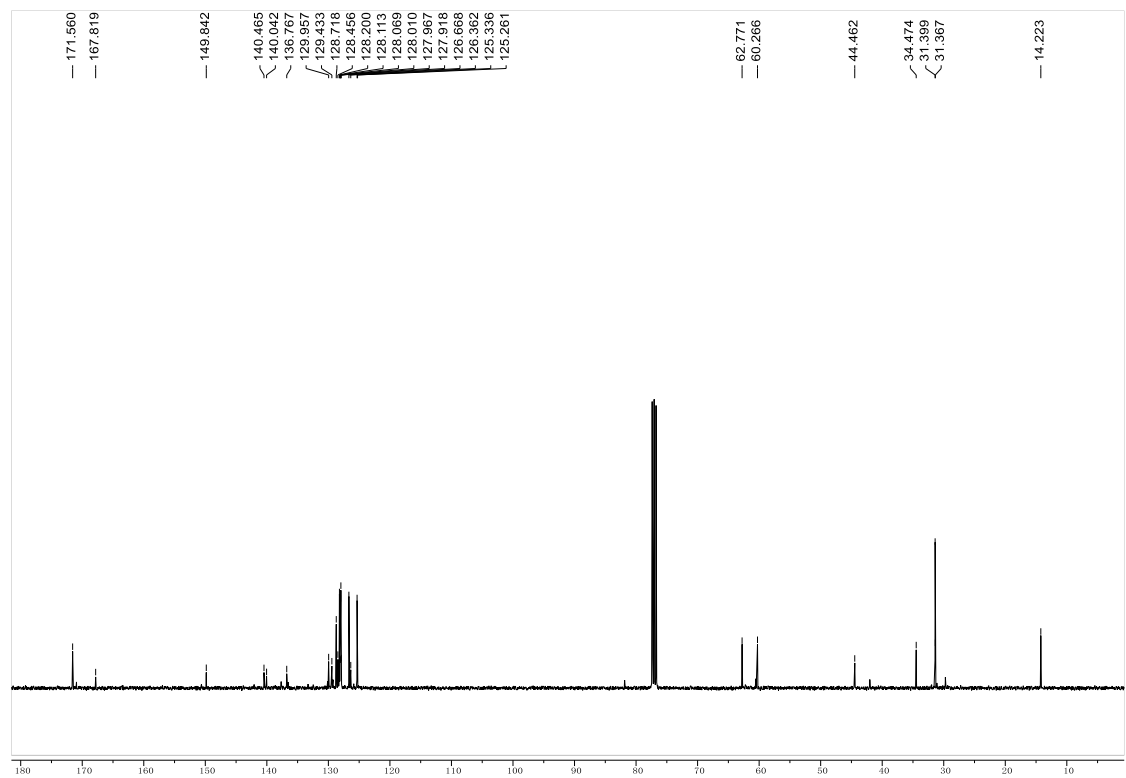



**<sup>1</sup>H NMR (400 MHz, CDCl<sub>3</sub>), <sup>13</sup>C NMR (100 MHz, CDCl<sub>3</sub>) spectrum of product 3m**

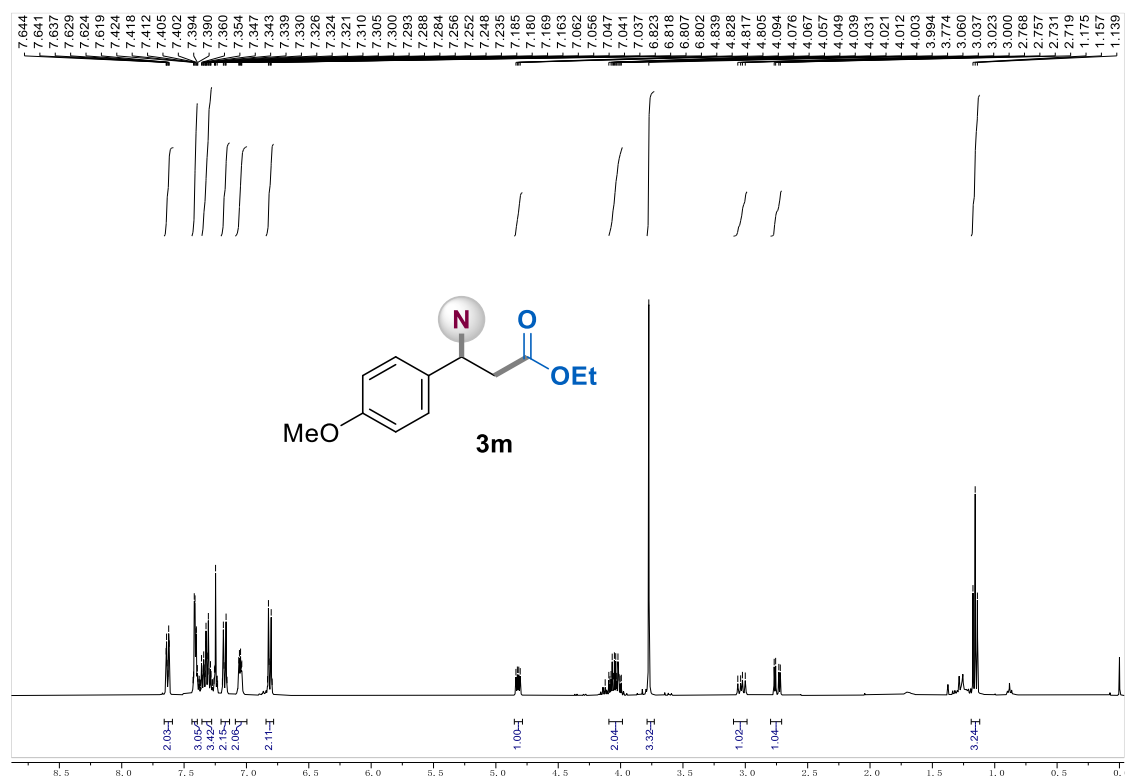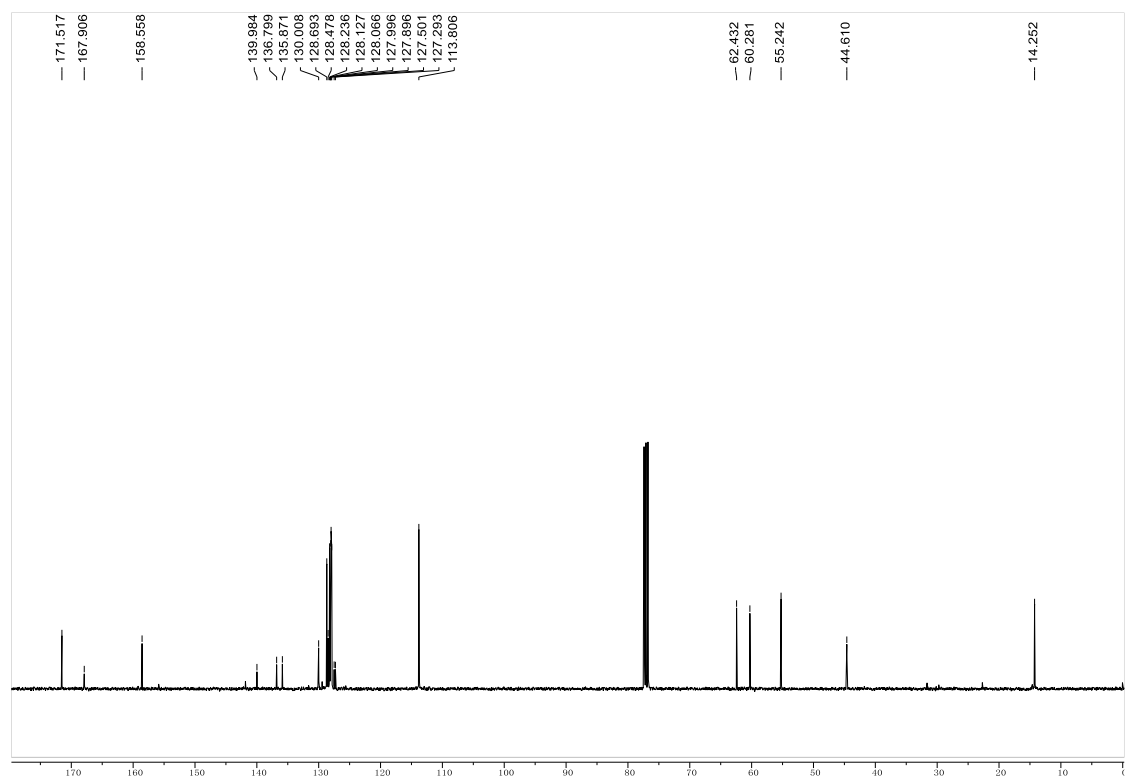

<sup>1</sup>H NMR (400 MHz, CDCl<sub>3</sub>), <sup>13</sup>C NMR (100 MHz, CDCl<sub>3</sub>) spectrum of product 3n

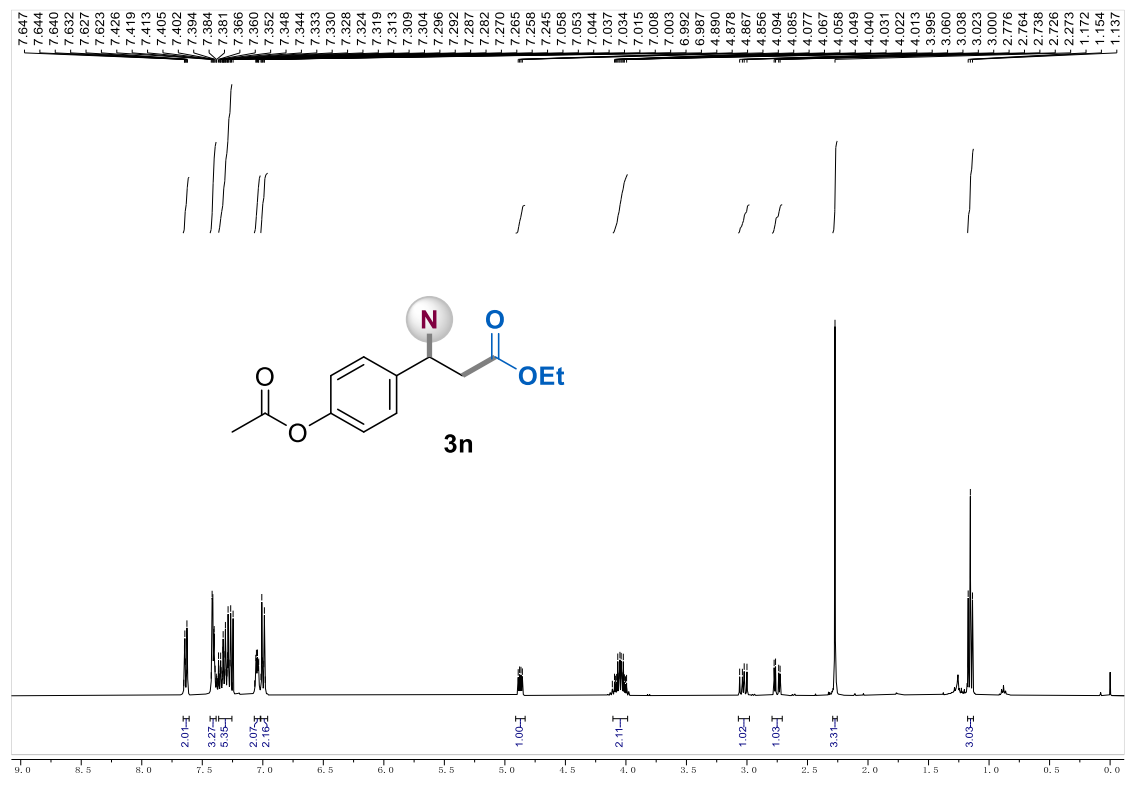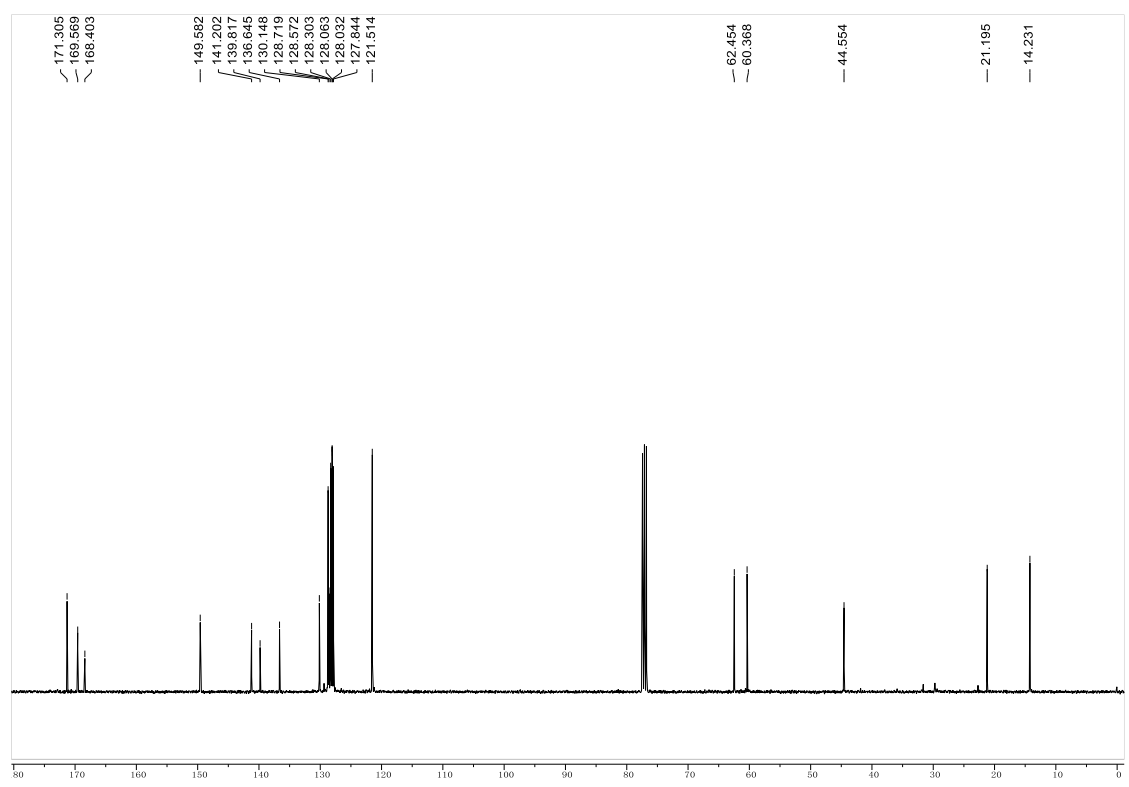

**<sup>1</sup>H NMR (400 MHz, CDCl<sub>3</sub>), <sup>13</sup>C NMR (100 MHz, CDCl<sub>3</sub>) spectrum of product 3o**

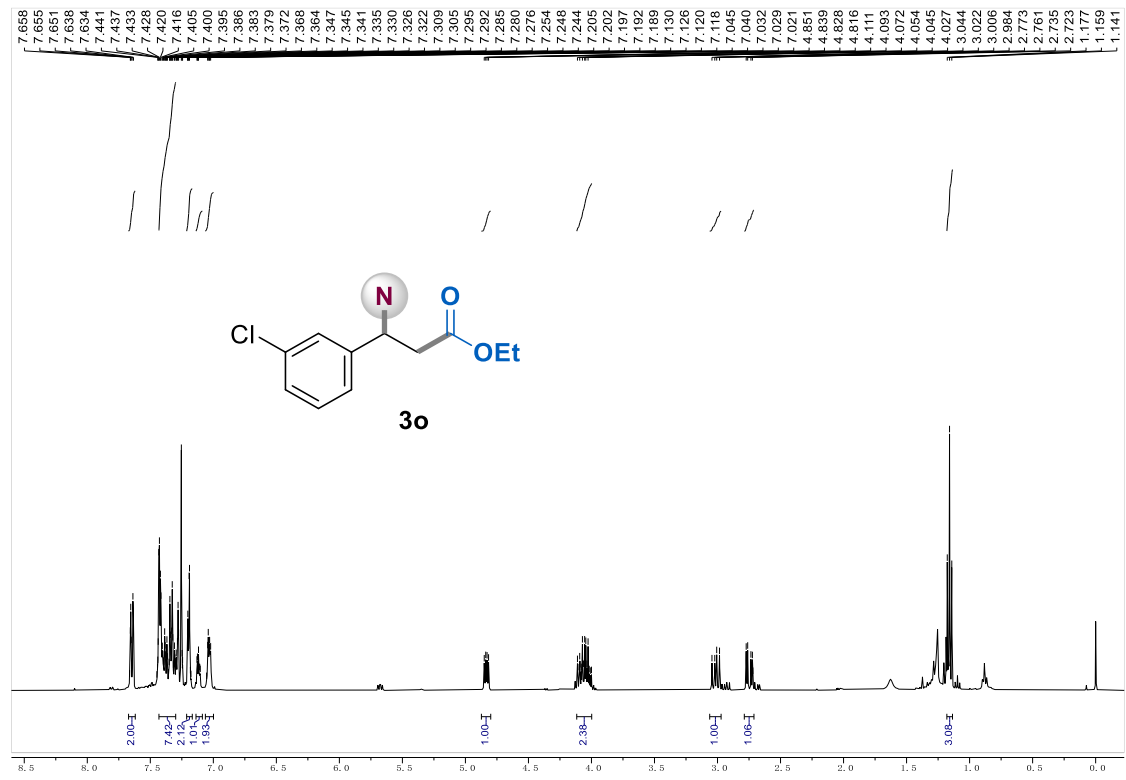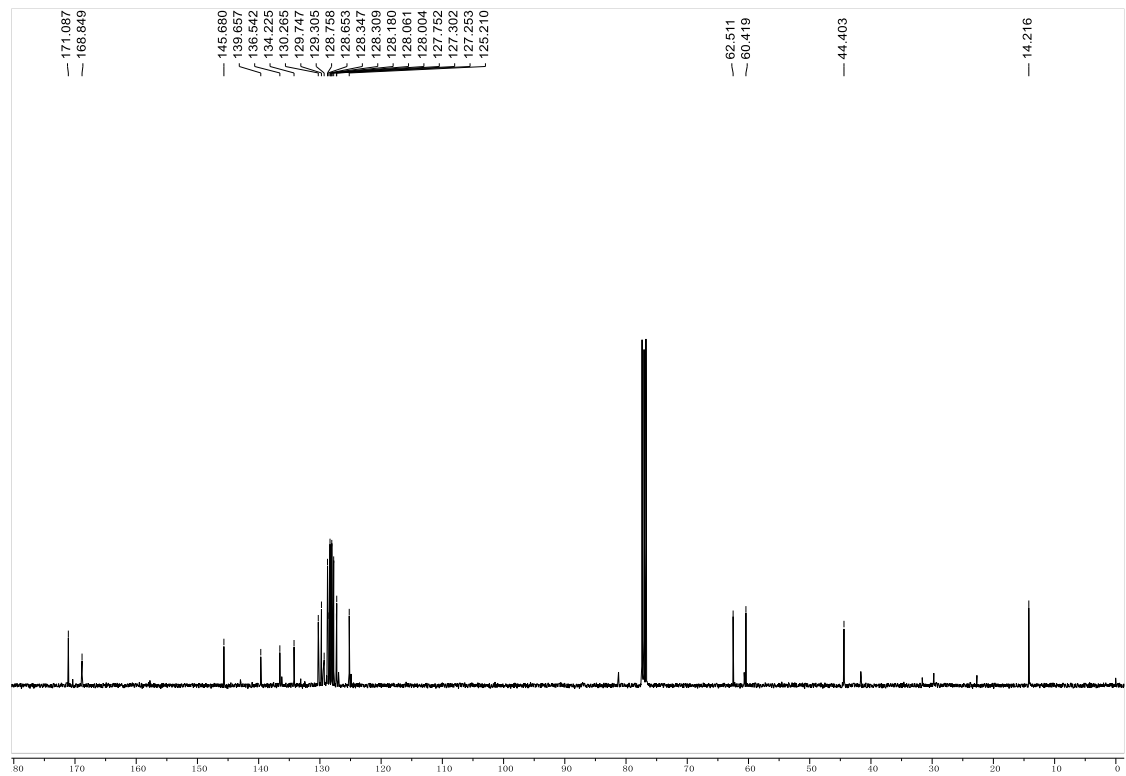

$^1\text{H}$  NMR (400 MHz,  $\text{CDCl}_3$ ),  $^{13}\text{C}$  NMR (100 MHz,  $\text{CDCl}_3$ ) spectrum of product 3p

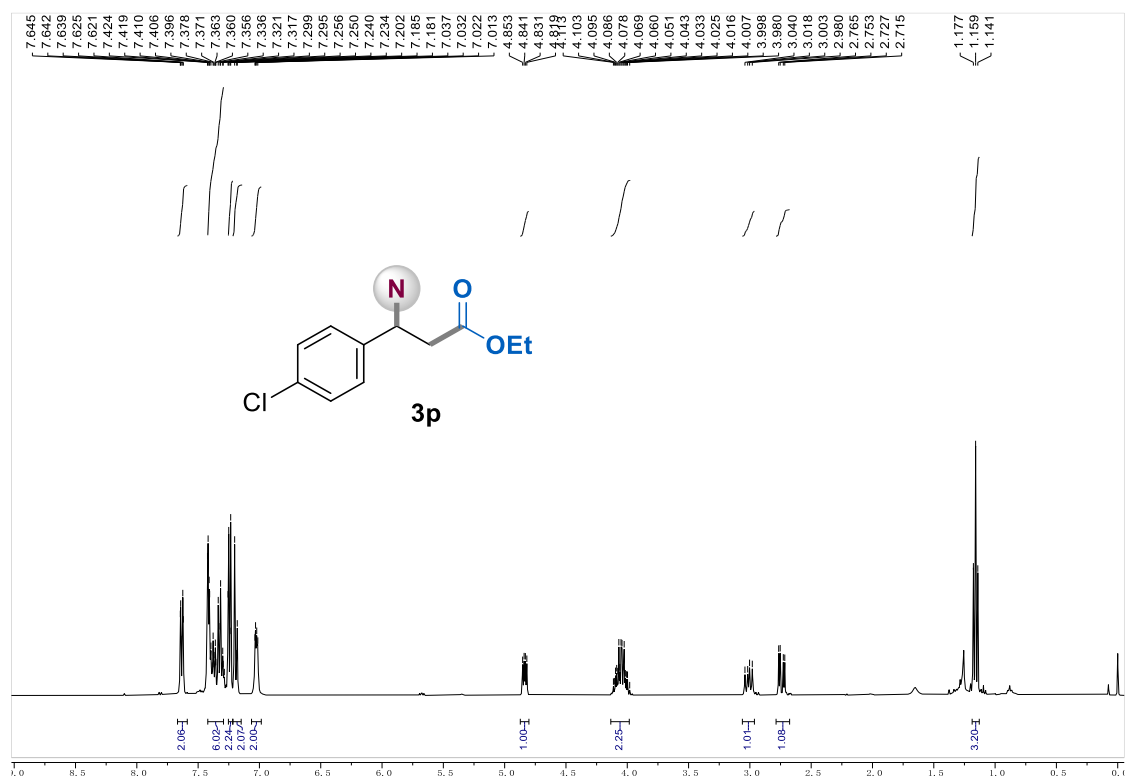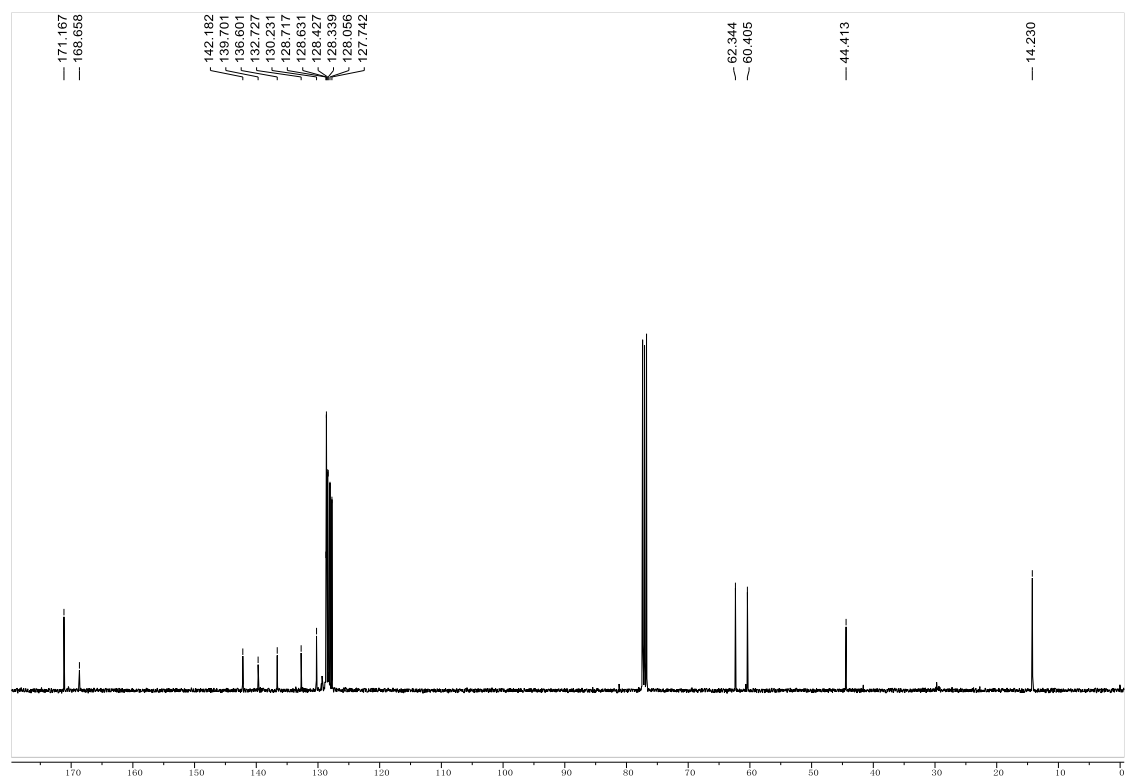

<sup>1</sup>H NMR (400 MHz, CDCl<sub>3</sub>), <sup>13</sup>C NMR (100 MHz, CDCl<sub>3</sub>) spectrum of product 3q

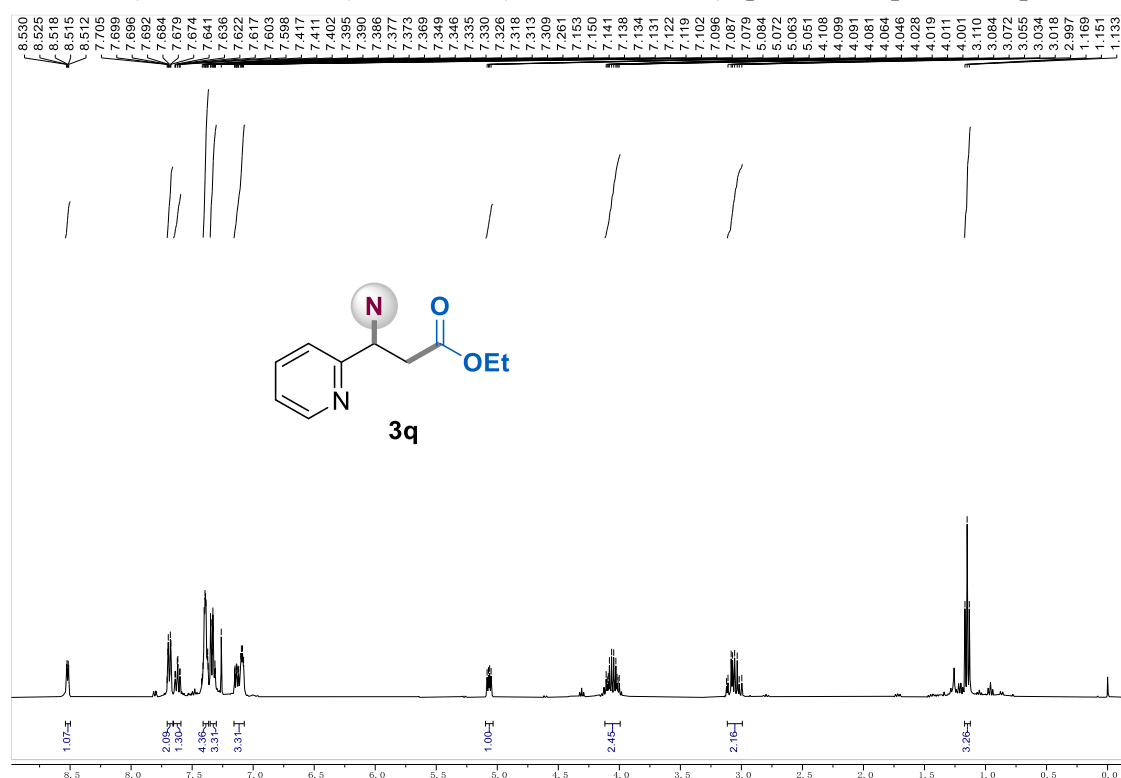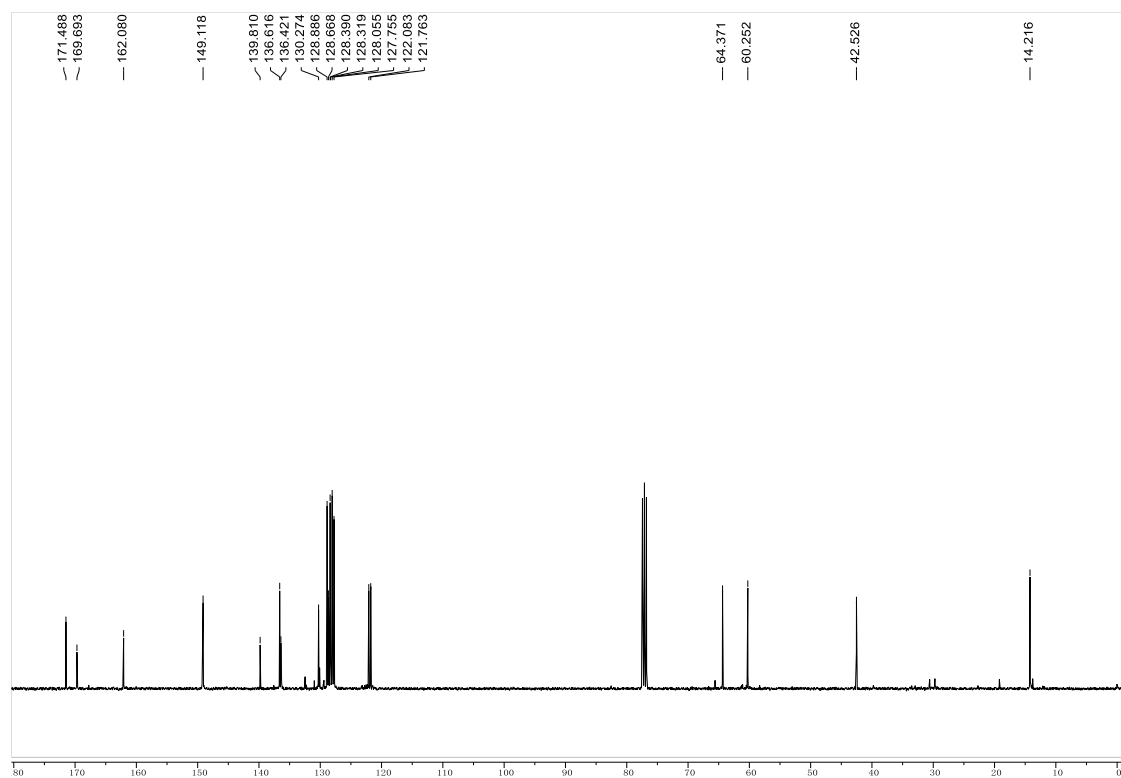

<sup>1</sup>H NMR (400 MHz, CDCl<sub>3</sub>), <sup>13</sup>C NMR (100 MHz, CDCl<sub>3</sub>) spectrum of product 3r

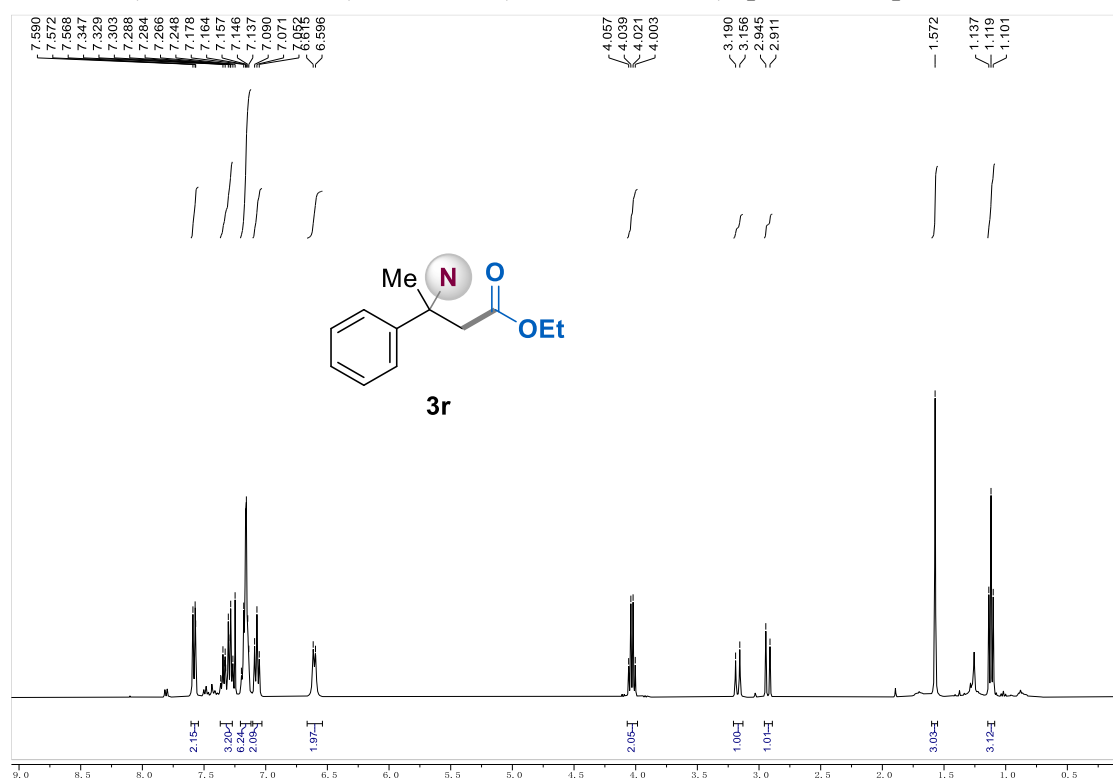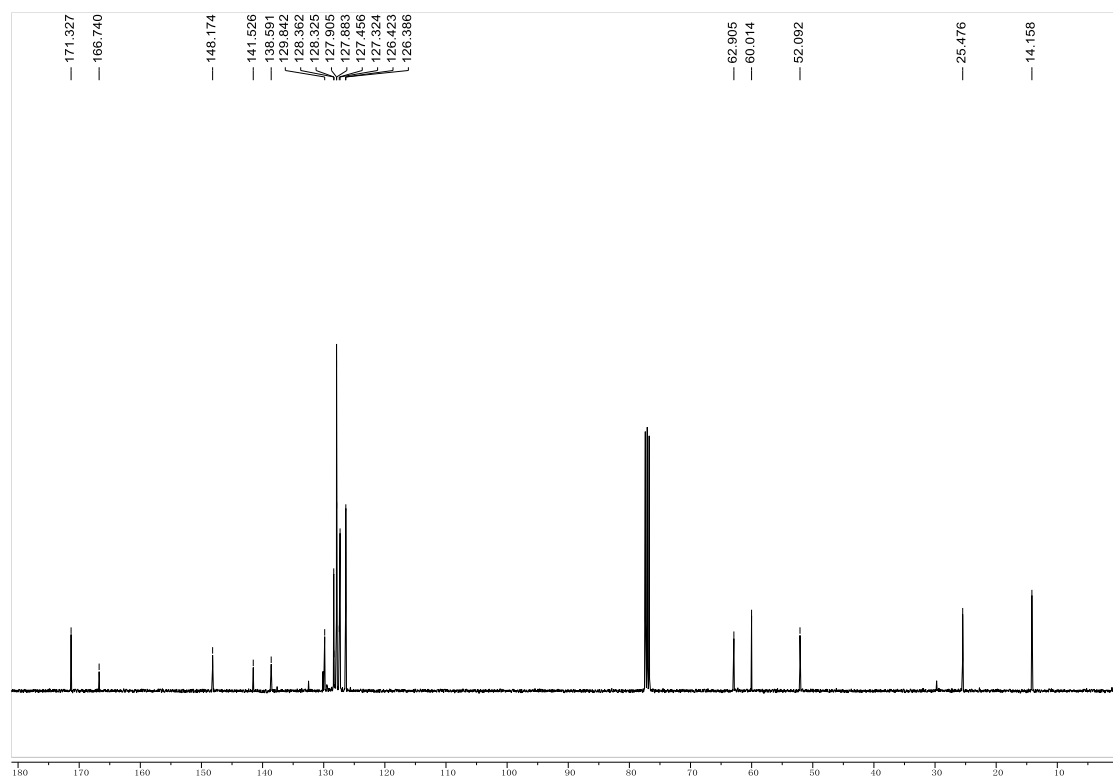

<sup>1</sup>H NMR (400 MHz, CDCl<sub>3</sub>), <sup>13</sup>C NMR (100 MHz, CDCl<sub>3</sub>) spectrum of product 3s

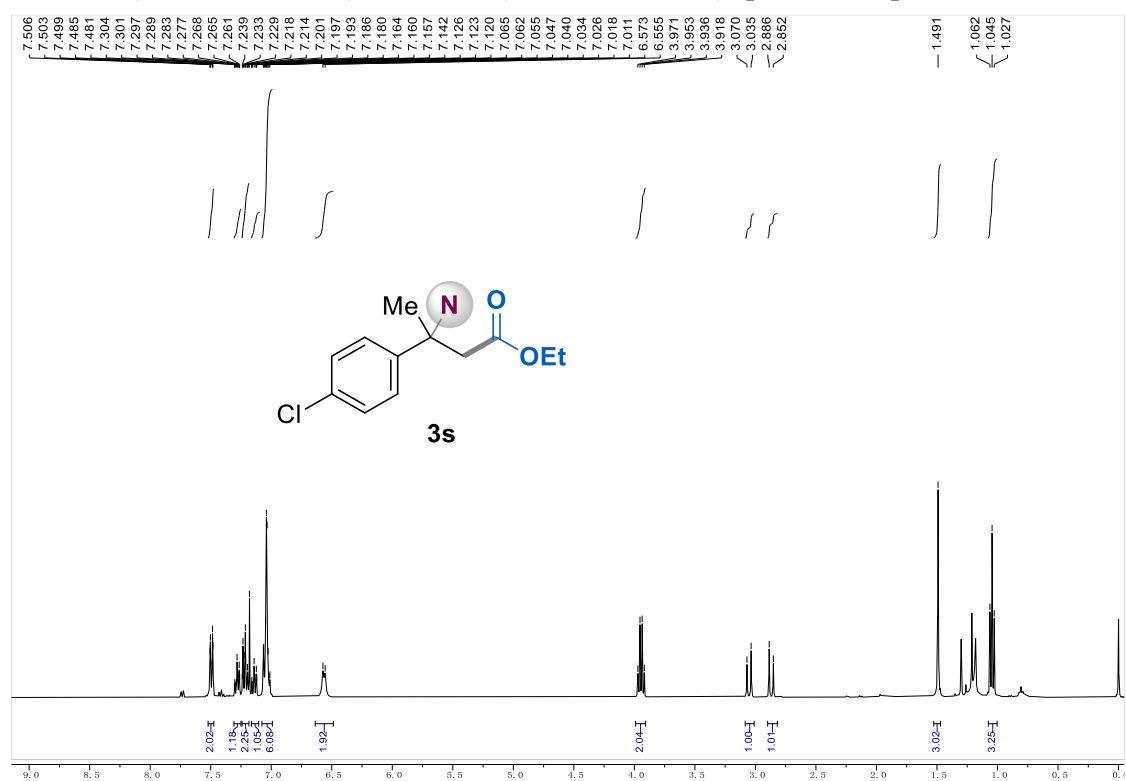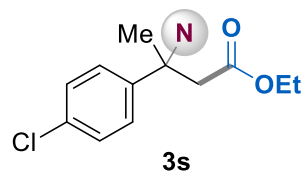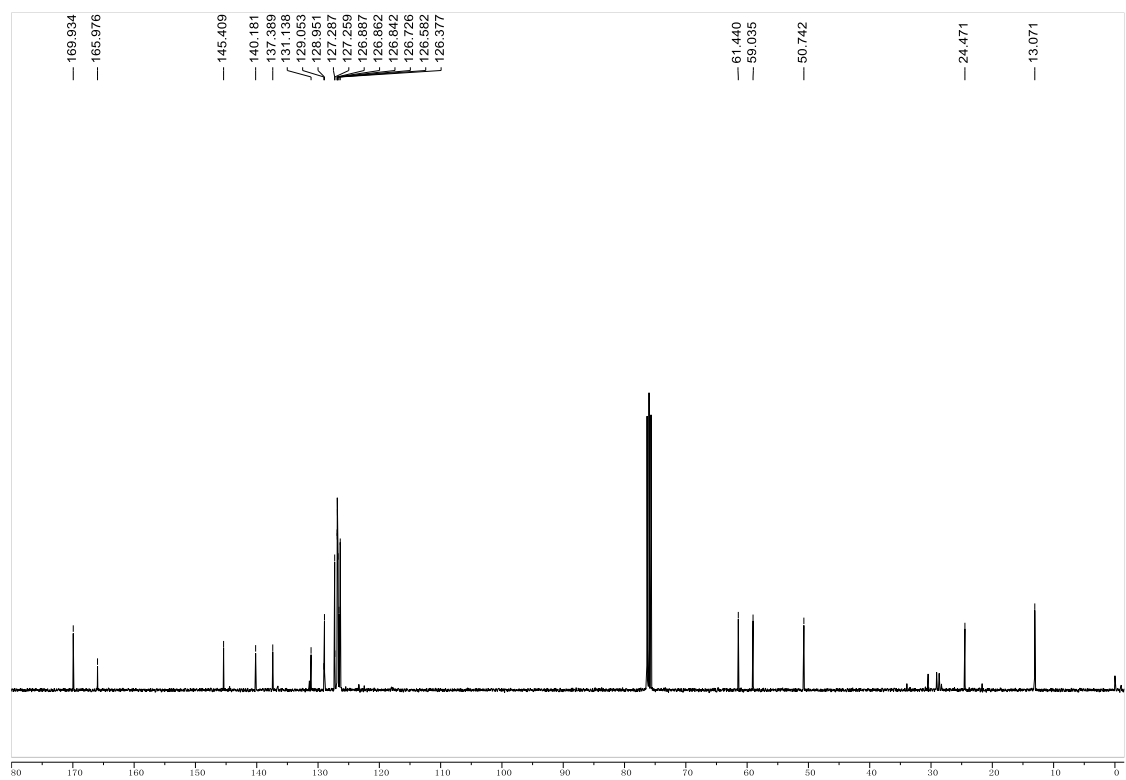

**<sup>1</sup>H NMR (400 MHz, CDCl<sub>3</sub>), <sup>19</sup>F NMR (375 MHz, CDCl<sub>3</sub>), <sup>13</sup>C NMR (100 MHz, CDCl<sub>3</sub>) spectrum of product 3t**

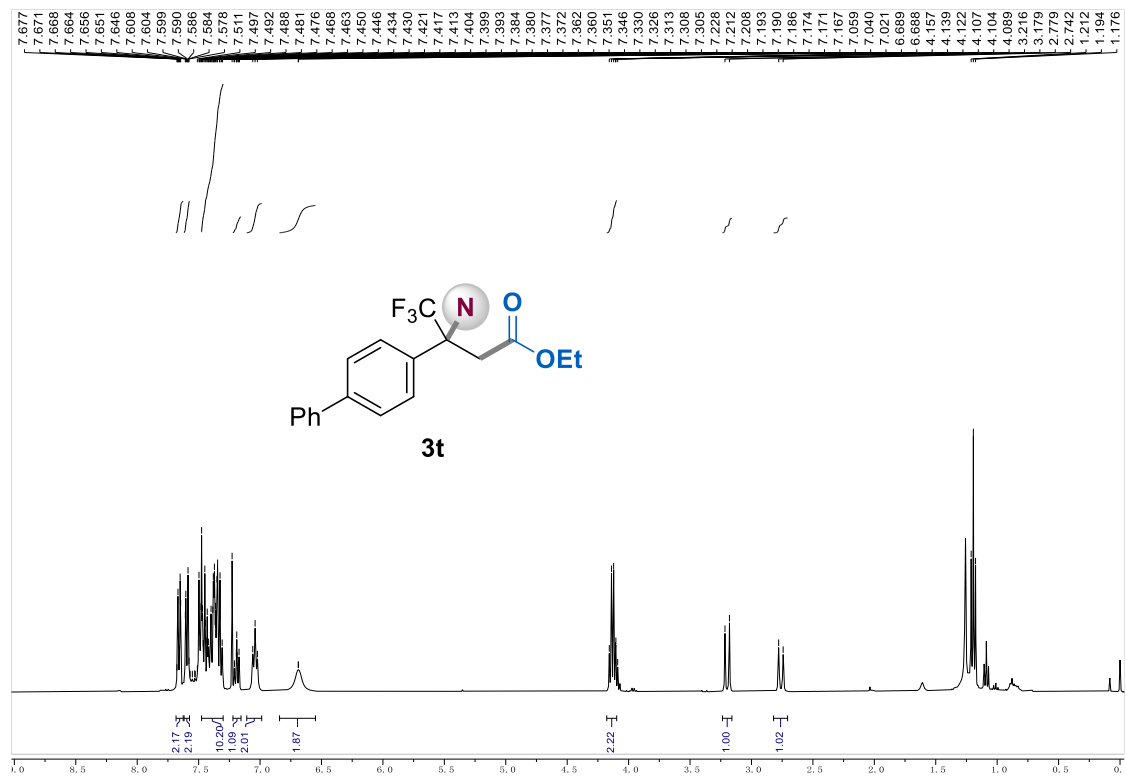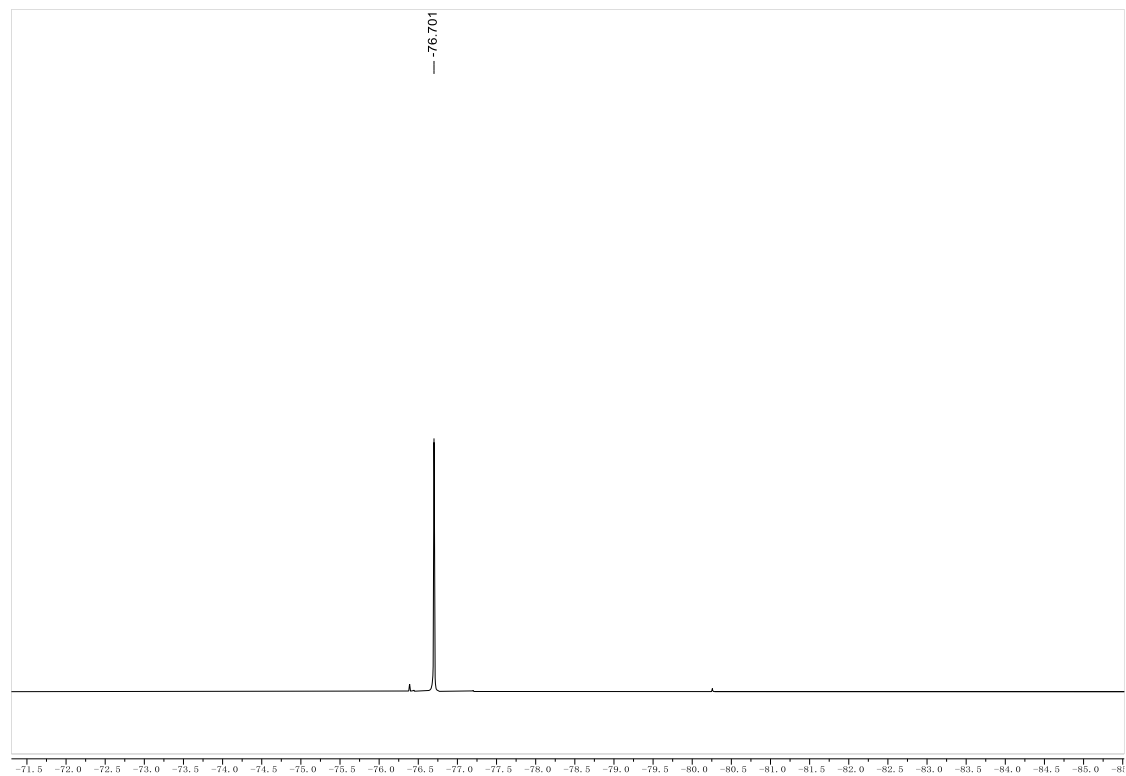



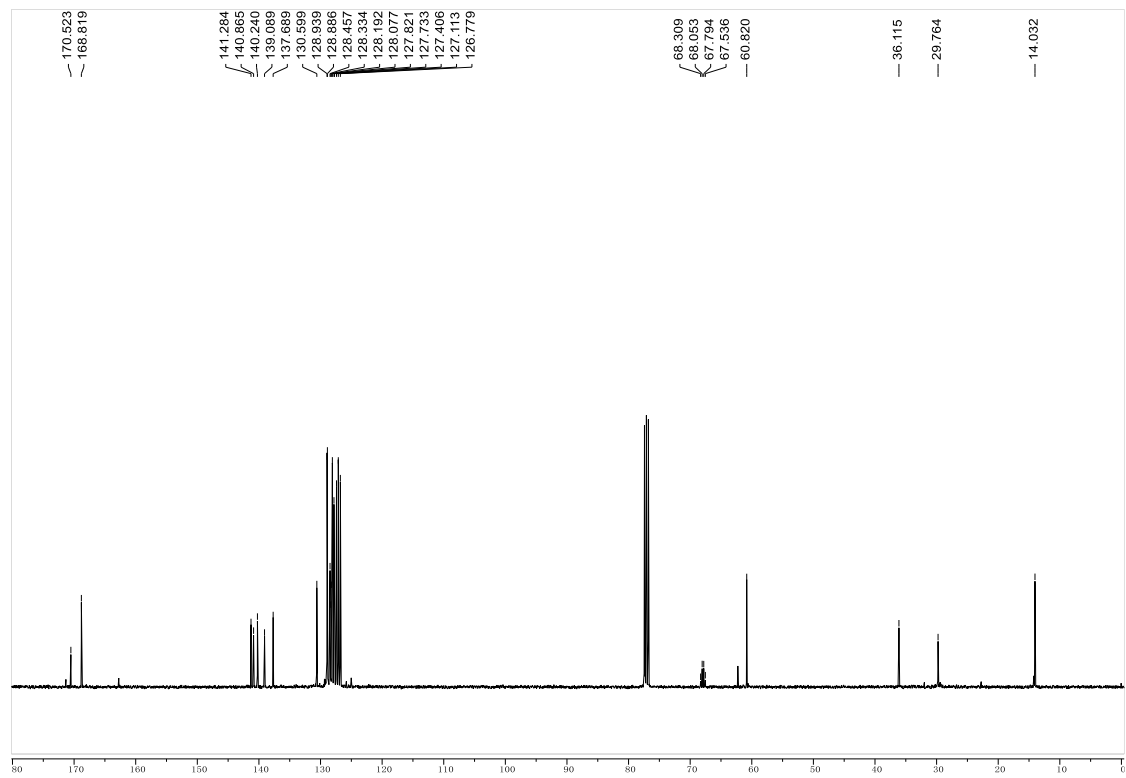

**<sup>1</sup>H NMR (600 MHz, CDCl<sub>3</sub>), <sup>19</sup>F NMR (565 MHz, CDCl<sub>3</sub>), <sup>13</sup>C NMR (150 MHz, CDCl<sub>3</sub>) spectrum of product 3u**

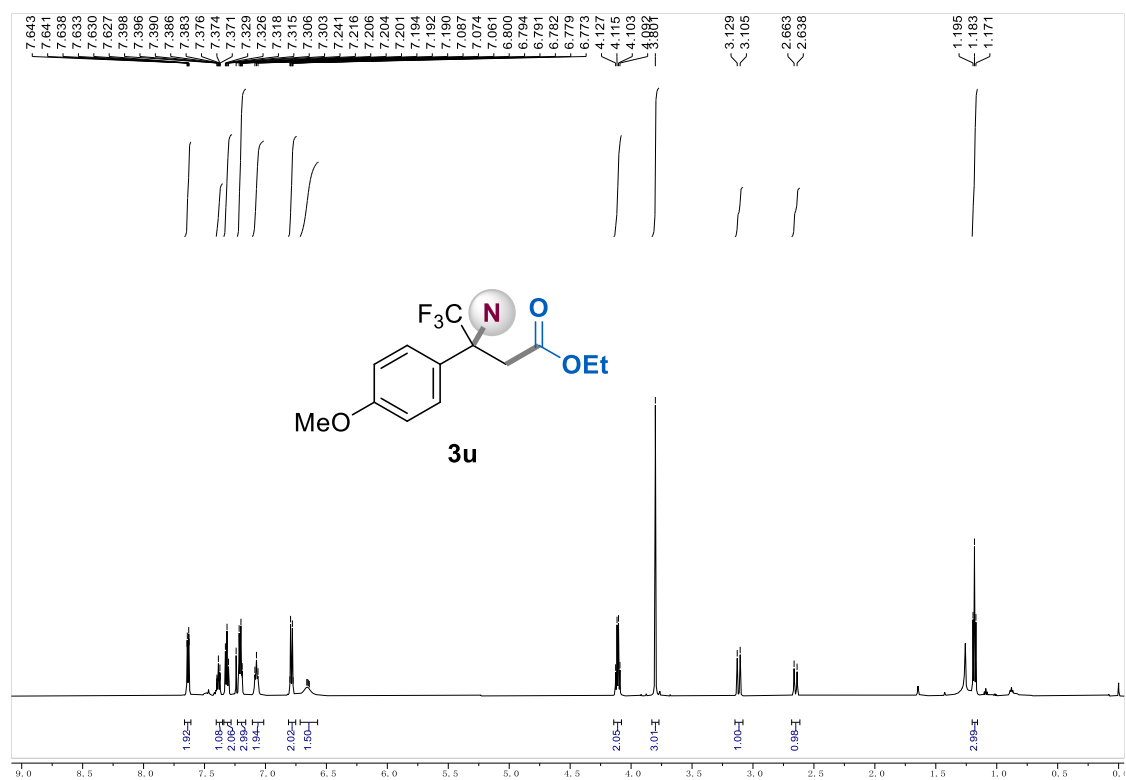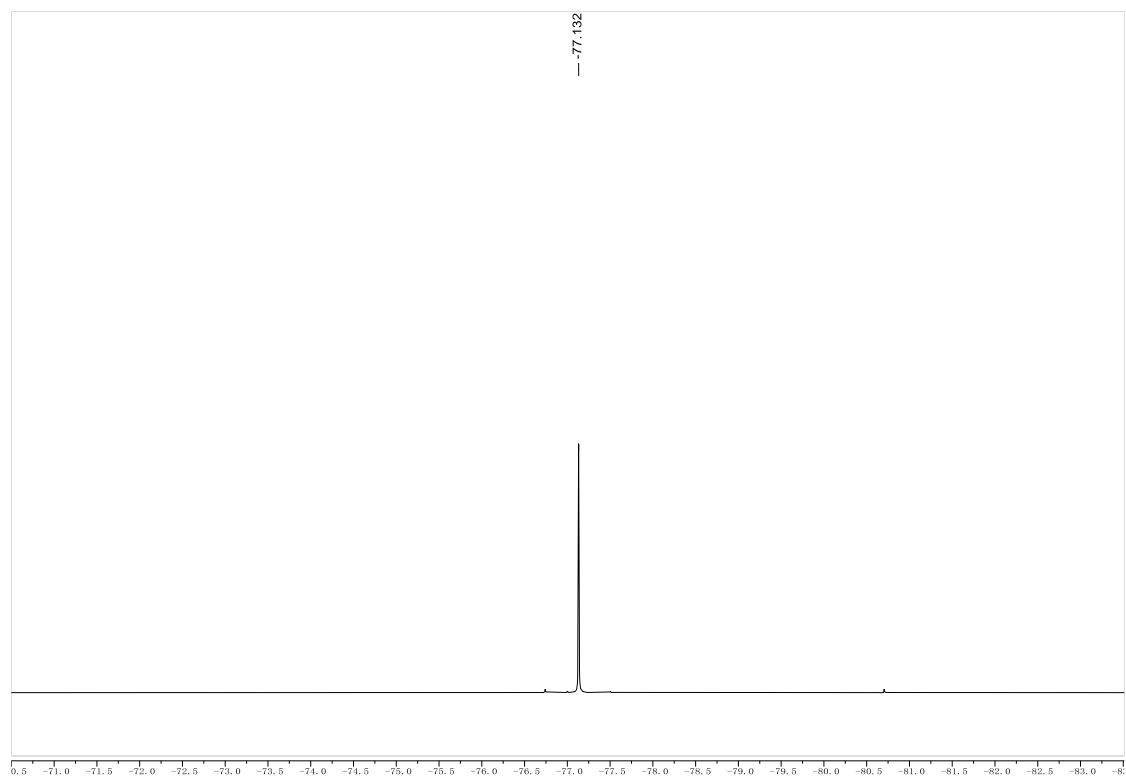

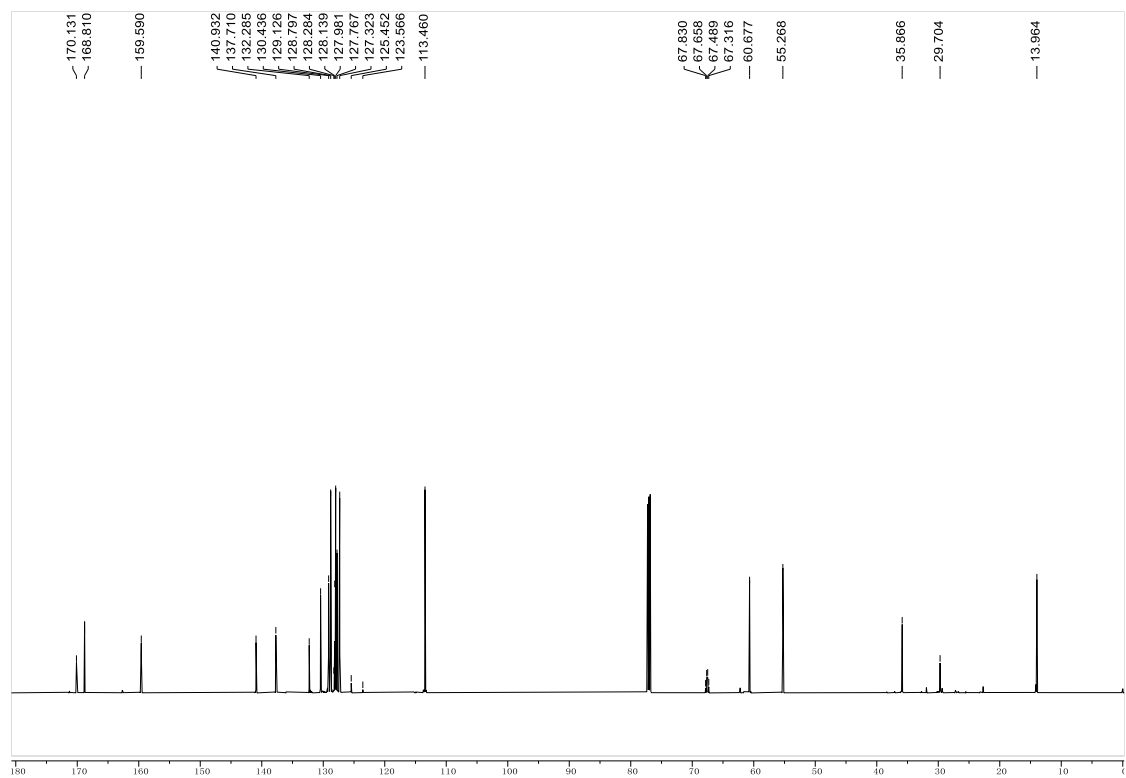

**<sup>1</sup>H NMR (600 MHz, CDCl<sub>3</sub>), <sup>19</sup>F NMR (565 MHz, CDCl<sub>3</sub>), <sup>13</sup>C NMR (150 MHz, CDCl<sub>3</sub>) spectrum of product 3v**

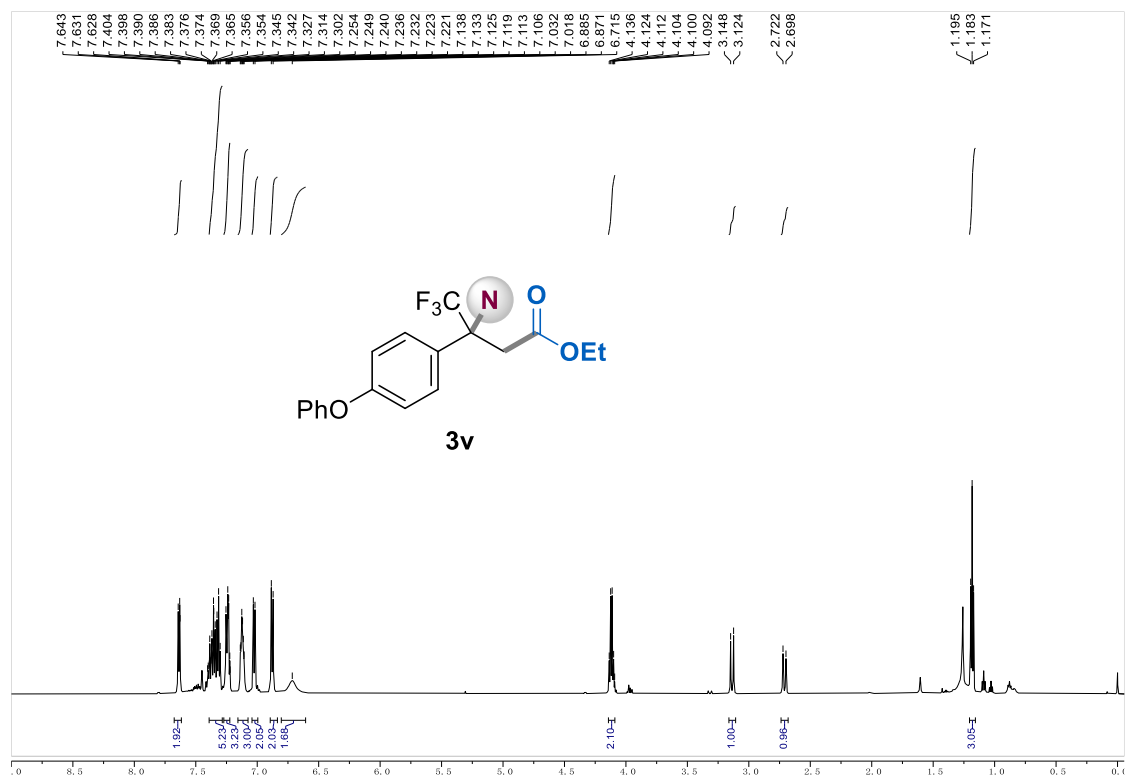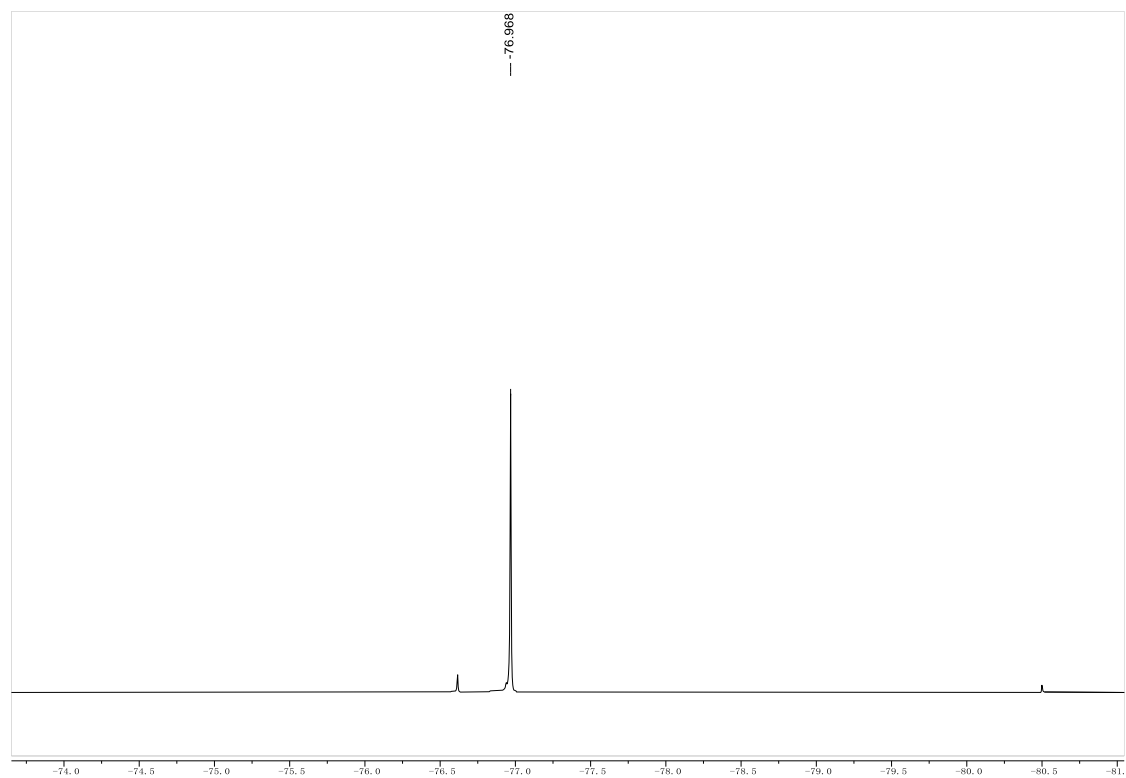

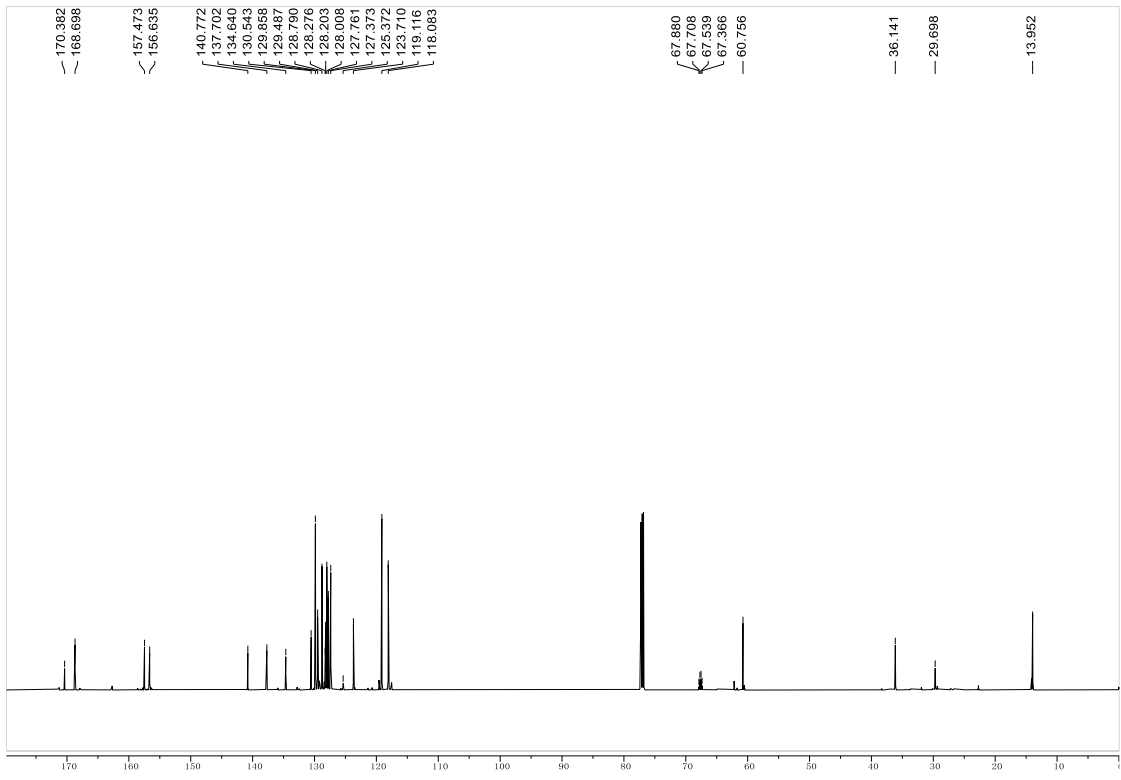

**$^1\text{H}$  NMR (600 MHz,  $\text{CDCl}_3$ ),  $^{19}\text{F}$  NMR (565 MHz,  $\text{CDCl}_3$ ),  $^{13}\text{C}$  NMR (150 MHz,  $\text{CDCl}_3$ ) spectrum of product 3w**

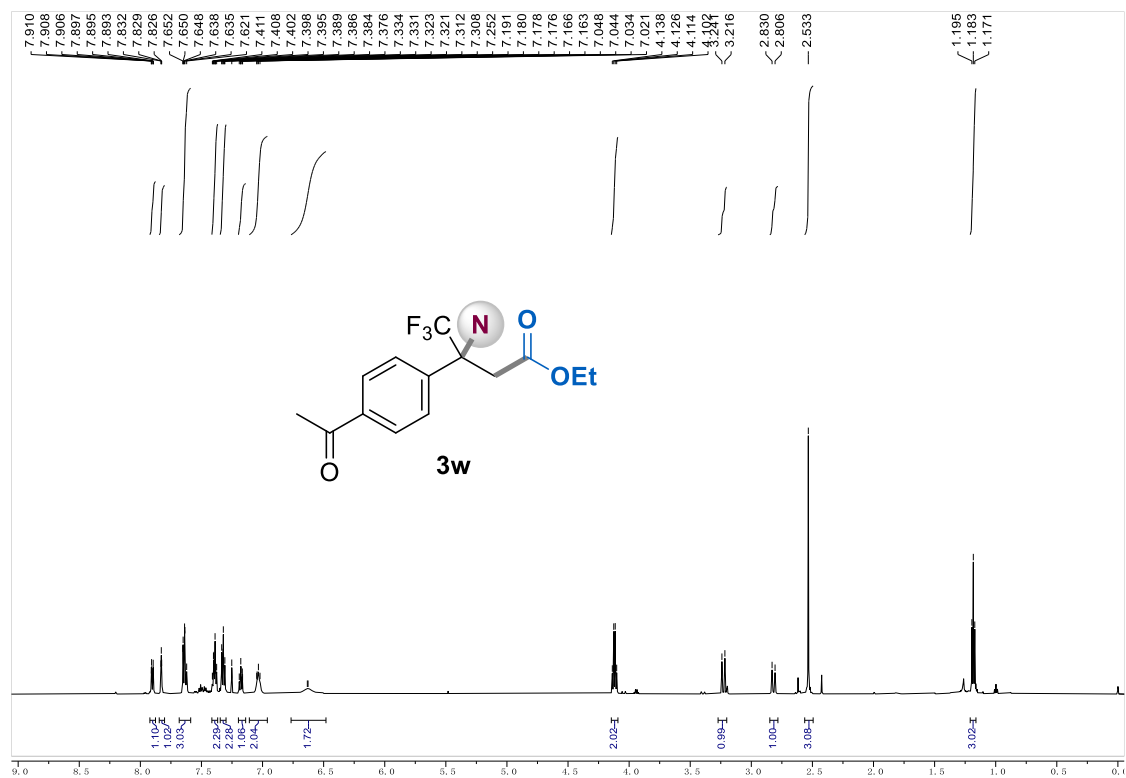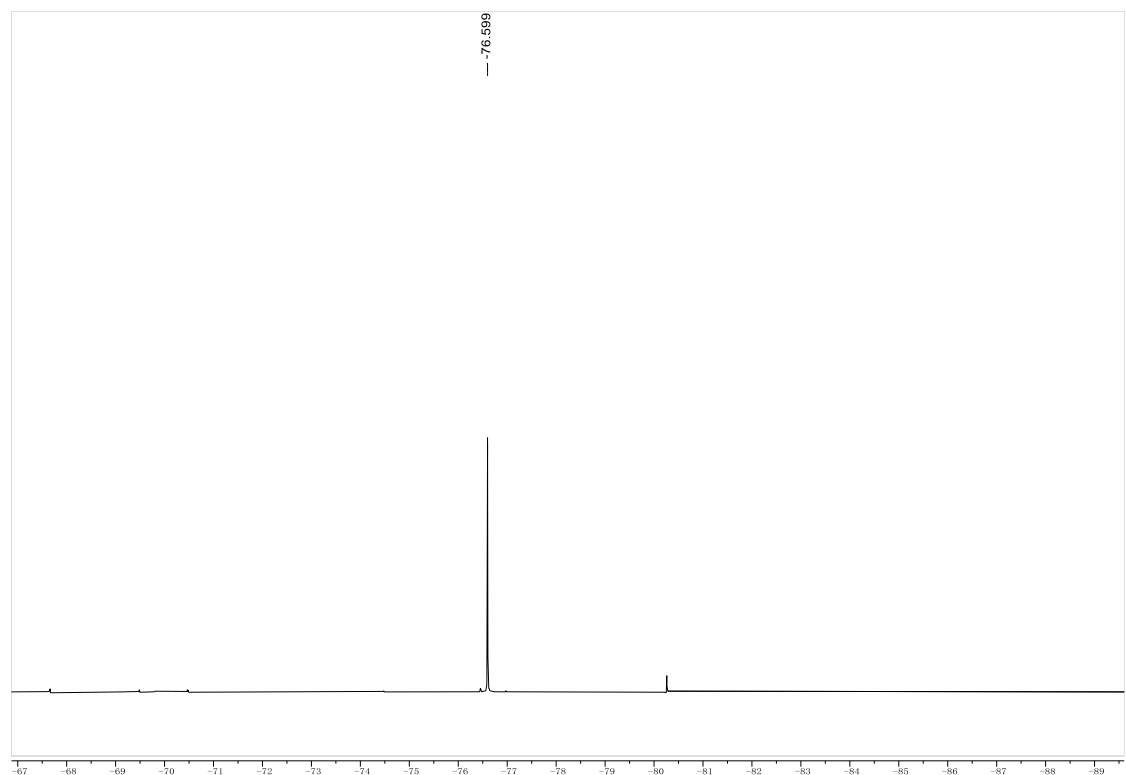

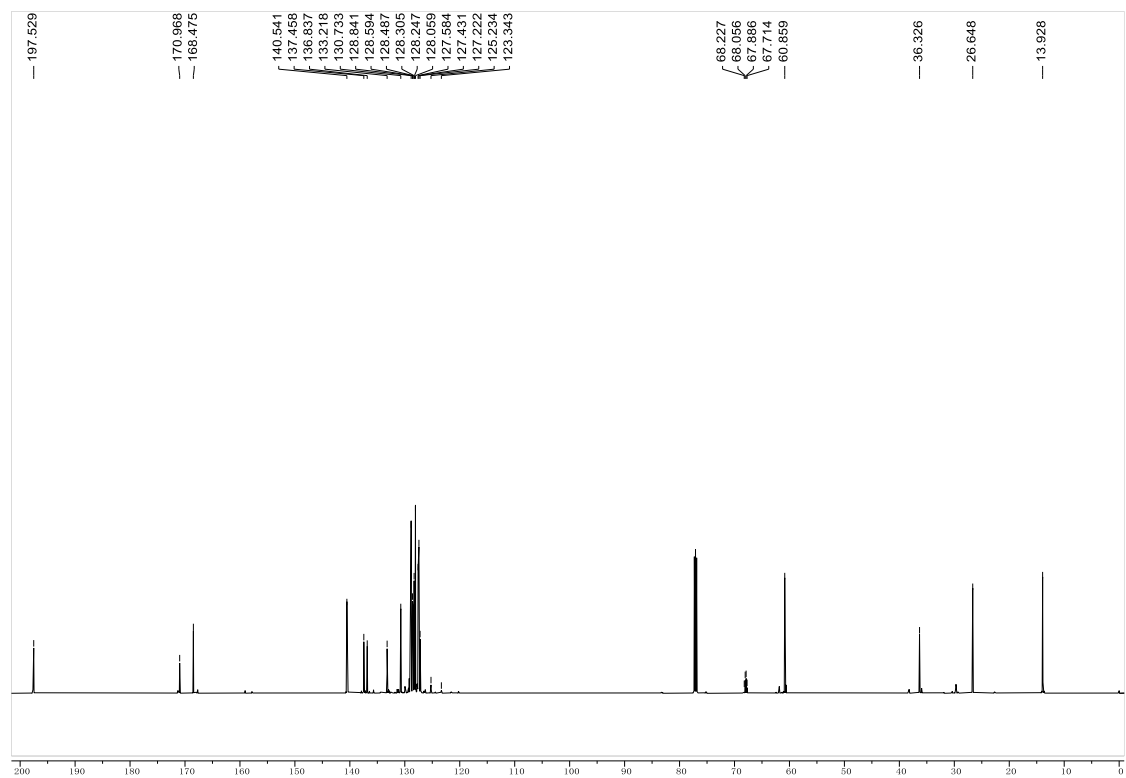

**$^1\text{H}$  NMR (600 MHz,  $\text{CDCl}_3$ ),  $^{19}\text{F}$  NMR (565 MHz,  $\text{CDCl}_3$ ),  $^{13}\text{C}$  NMR (150 MHz,  $\text{CDCl}_3$ ) spectrum of product 3x**

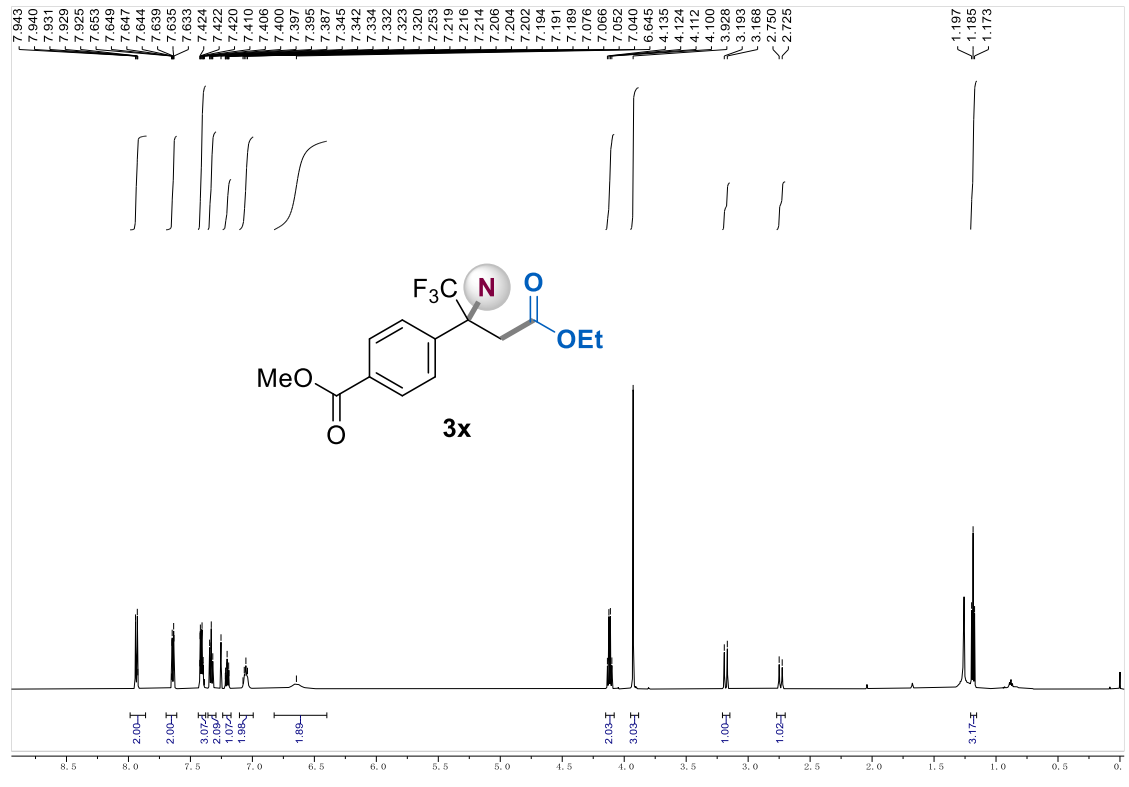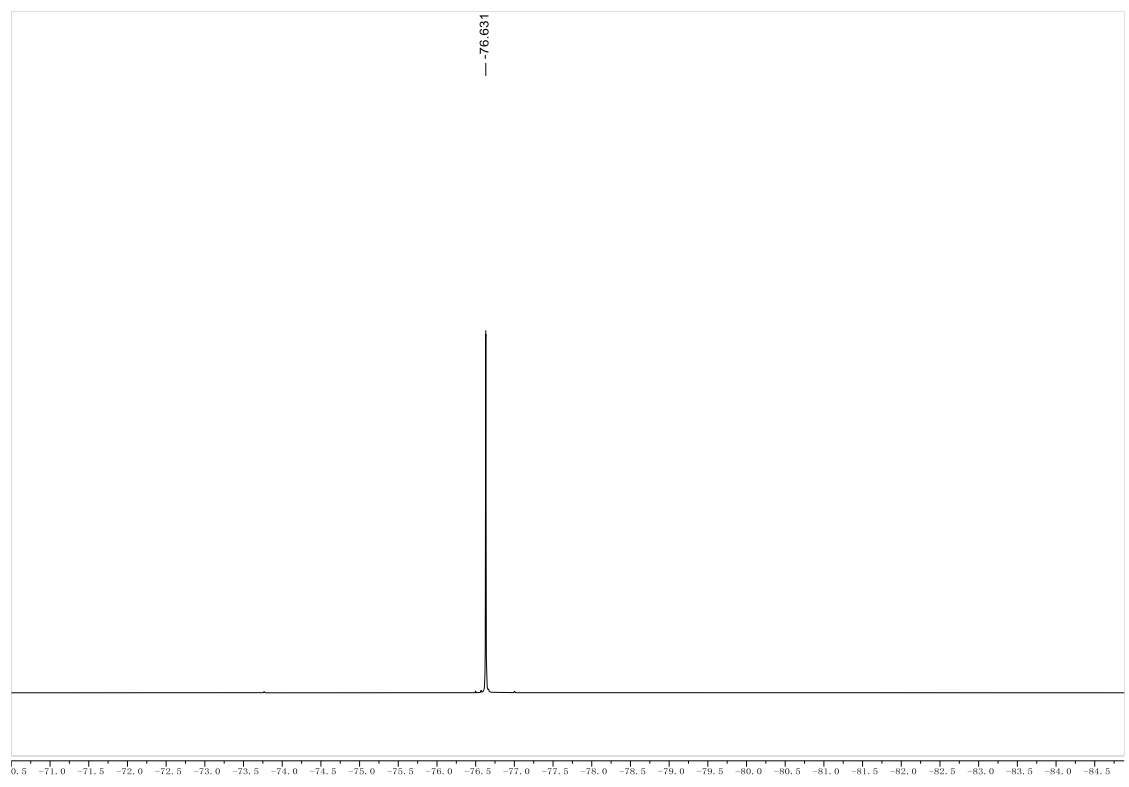



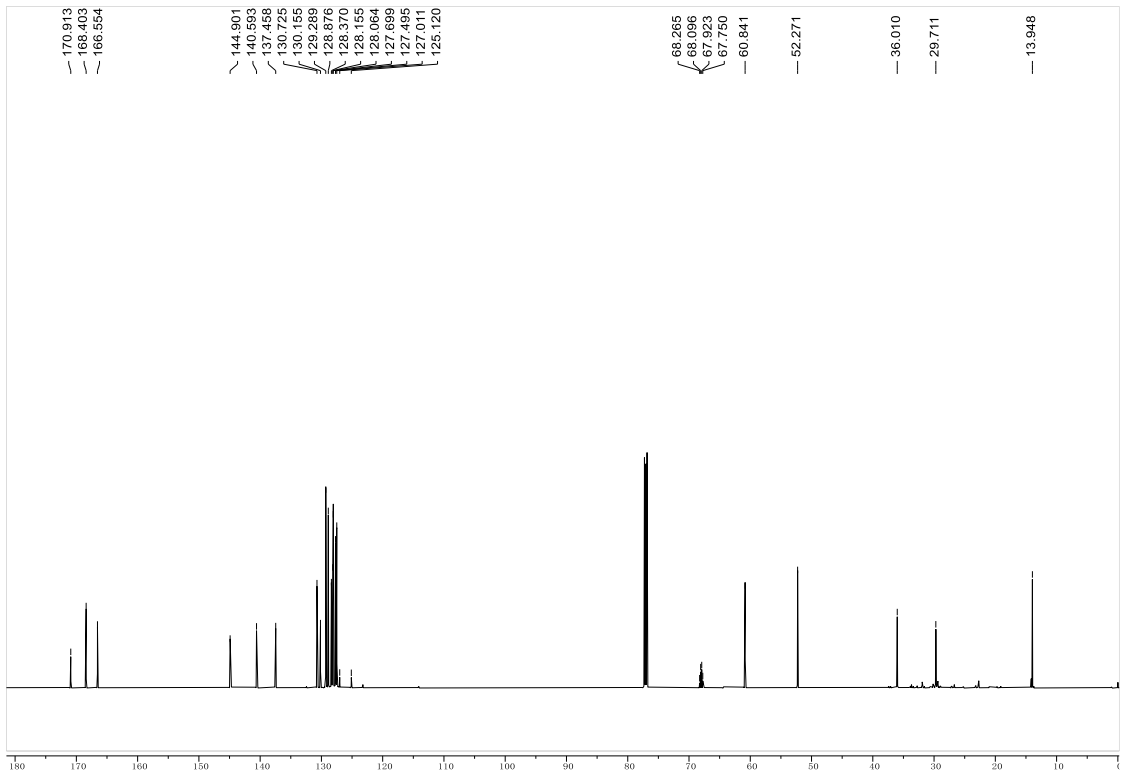

**<sup>1</sup>H NMR (600 MHz, CDCl<sub>3</sub>), <sup>19</sup>F NMR (565 MHz, CDCl<sub>3</sub>), <sup>13</sup>C NMR (150 MHz, CDCl<sub>3</sub>) spectrum of product 3y**

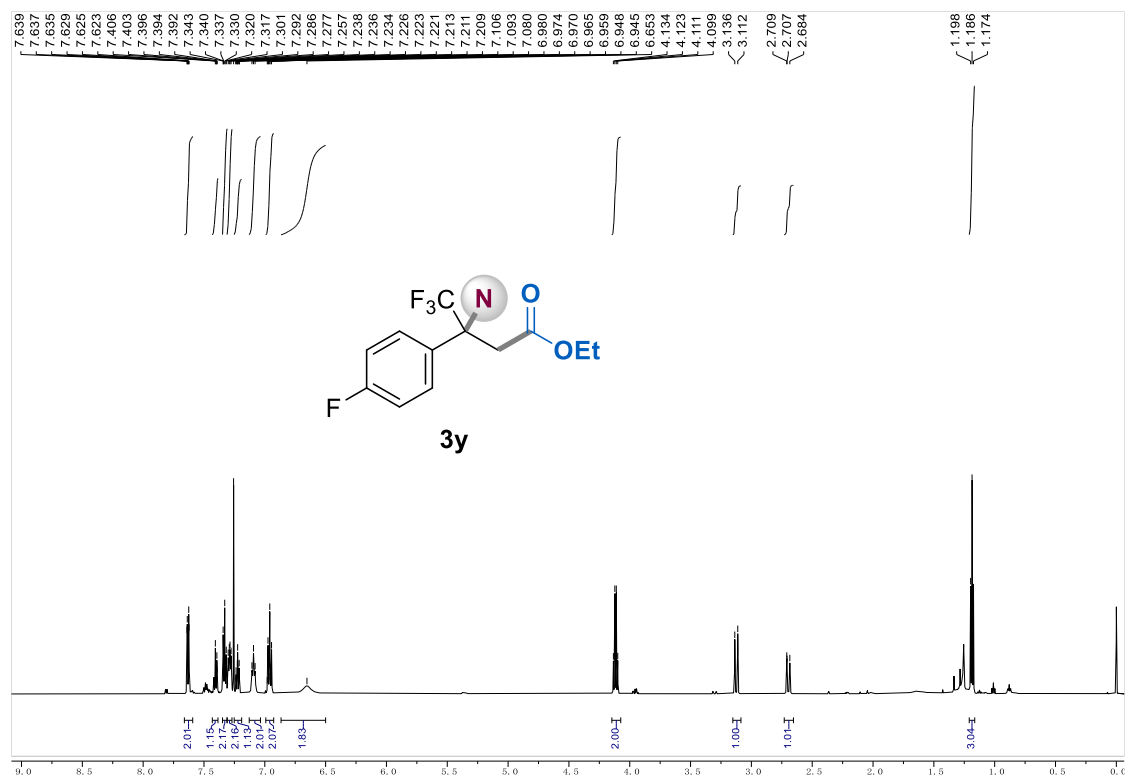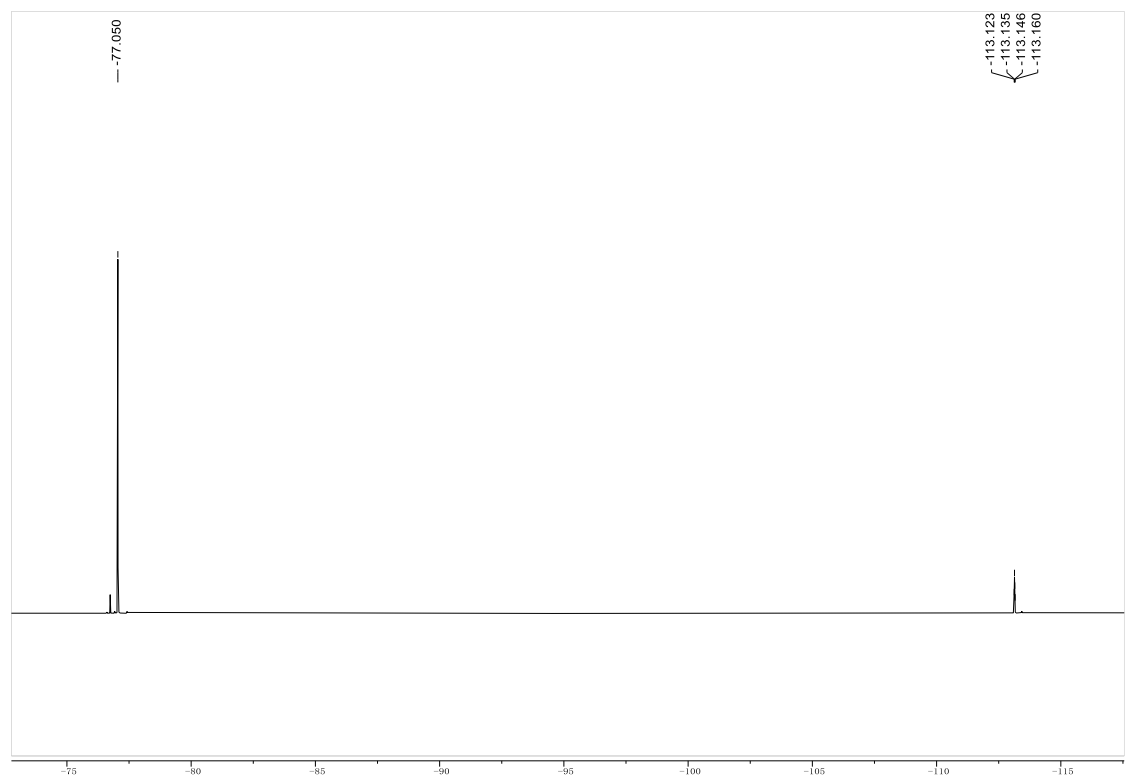

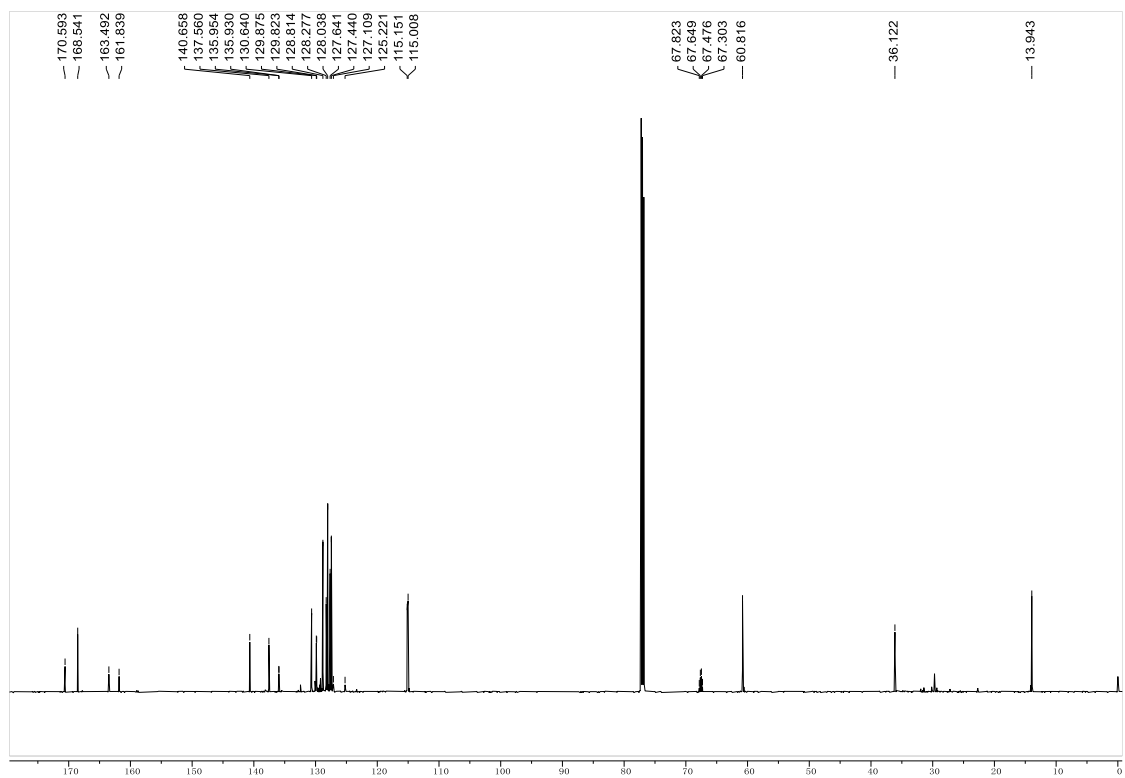

**<sup>1</sup>H NMR (600 MHz, CDCl<sub>3</sub>), <sup>19</sup>F NMR (565 MHz, CDCl<sub>3</sub>), <sup>13</sup>C NMR (150 MHz, CDCl<sub>3</sub>) spectrum of product 3z**

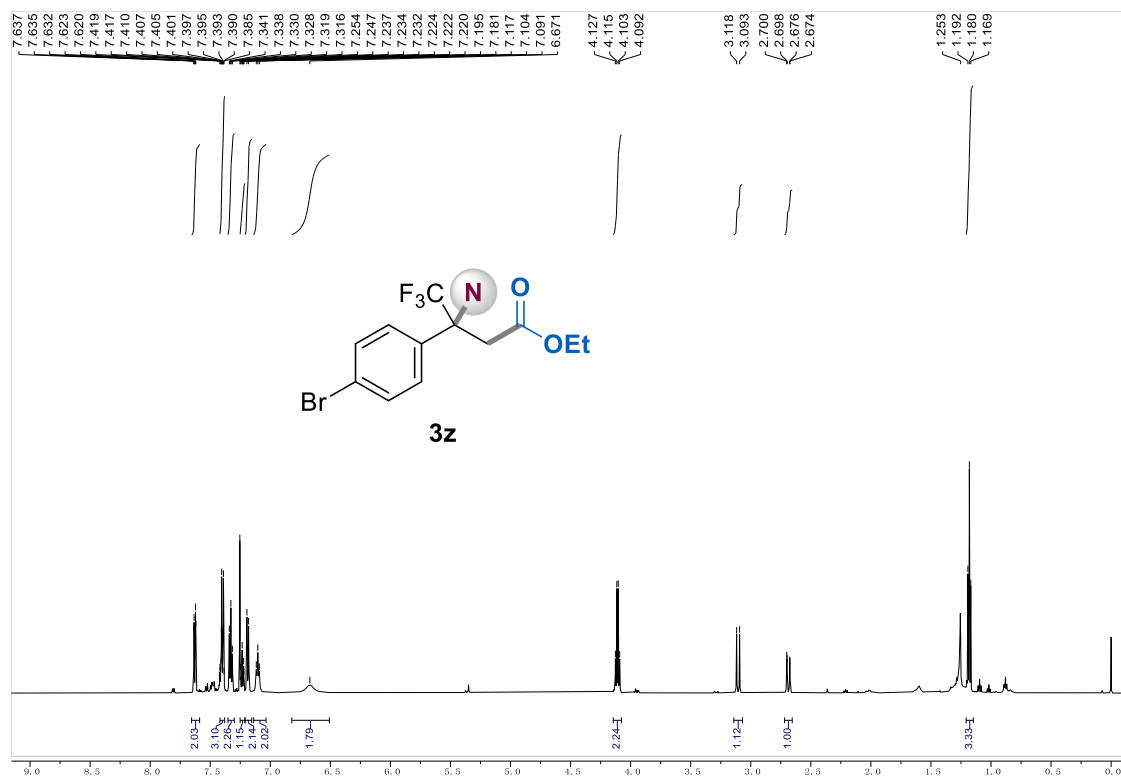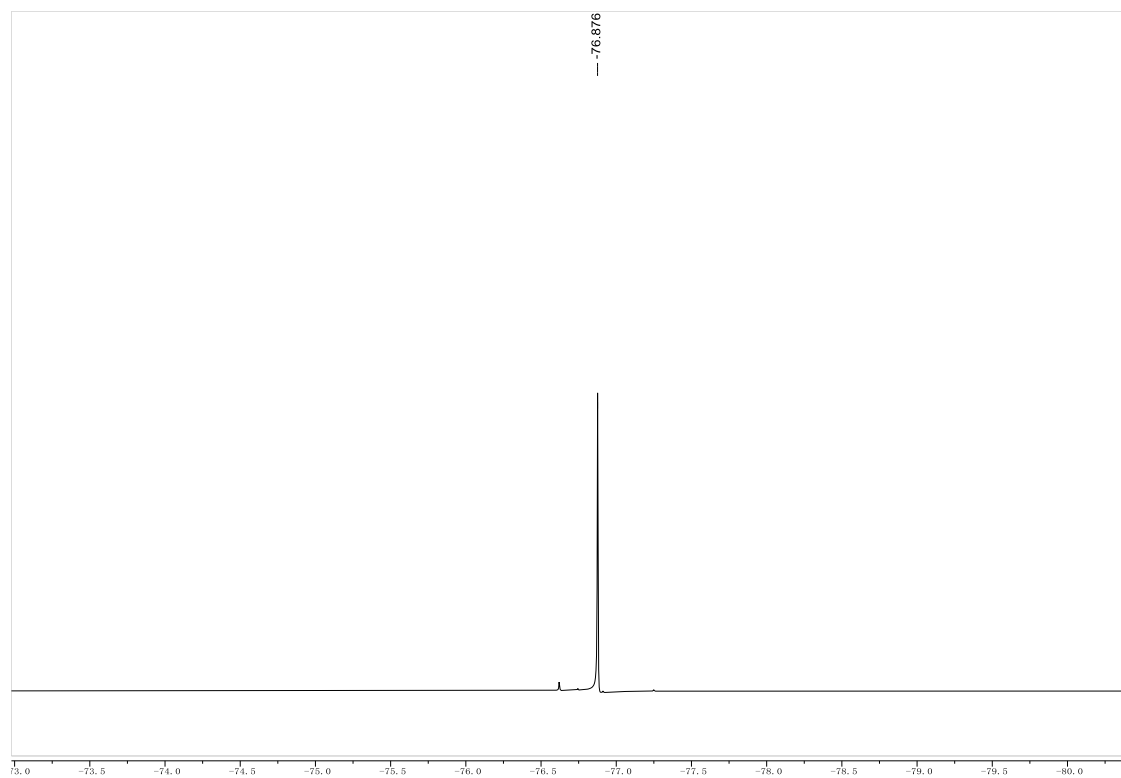

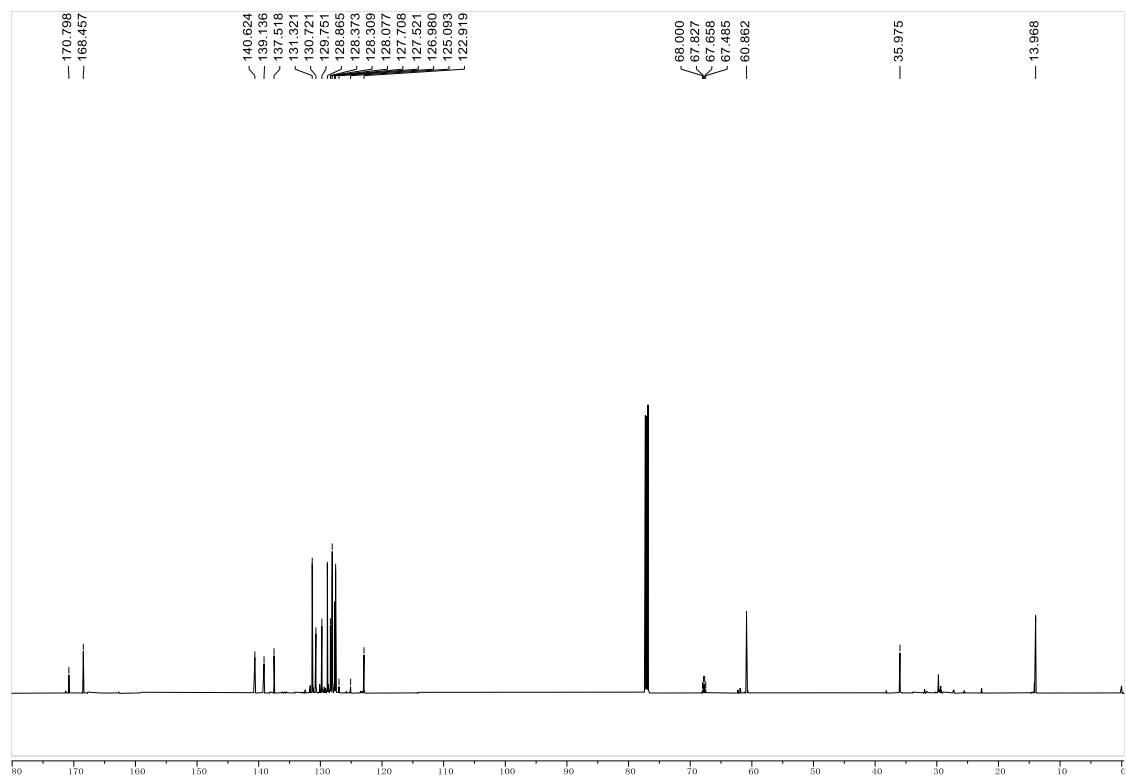

**<sup>1</sup>H NMR (600 MHz, CDCl<sub>3</sub>), <sup>19</sup>F NMR (565 MHz, CDCl<sub>3</sub>), <sup>13</sup>C NMR (150 MHz, CDCl<sub>3</sub>) spectrum of product 4a**

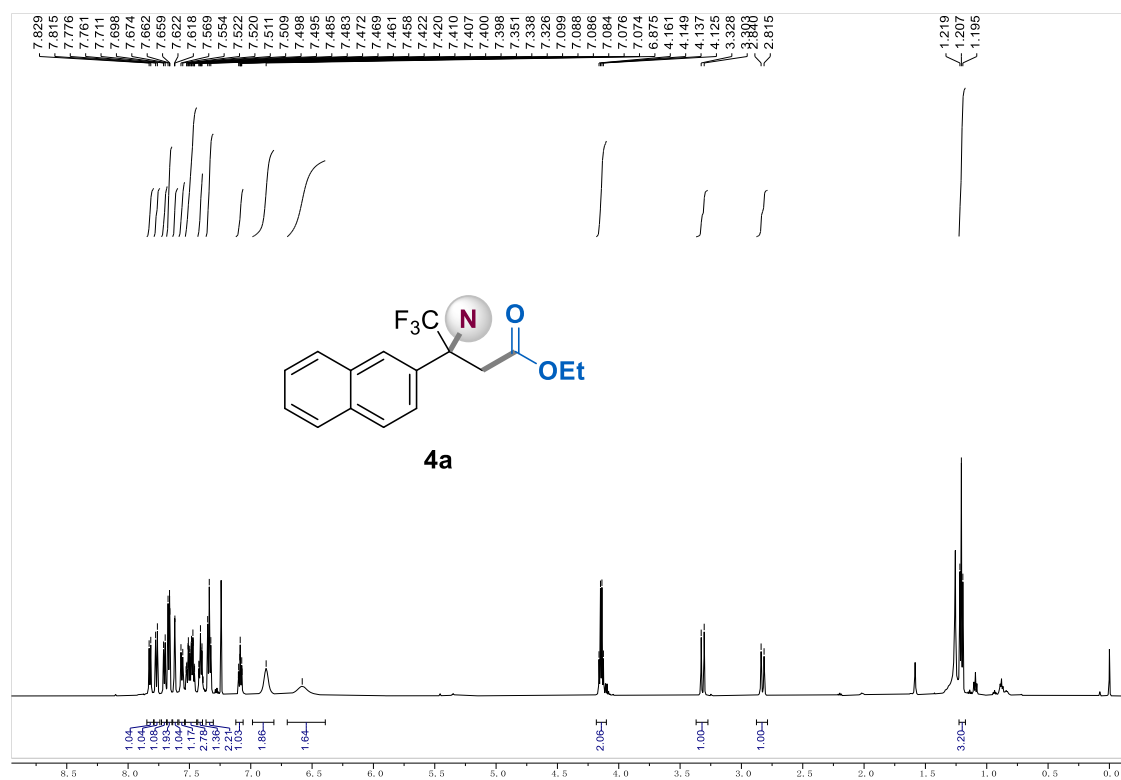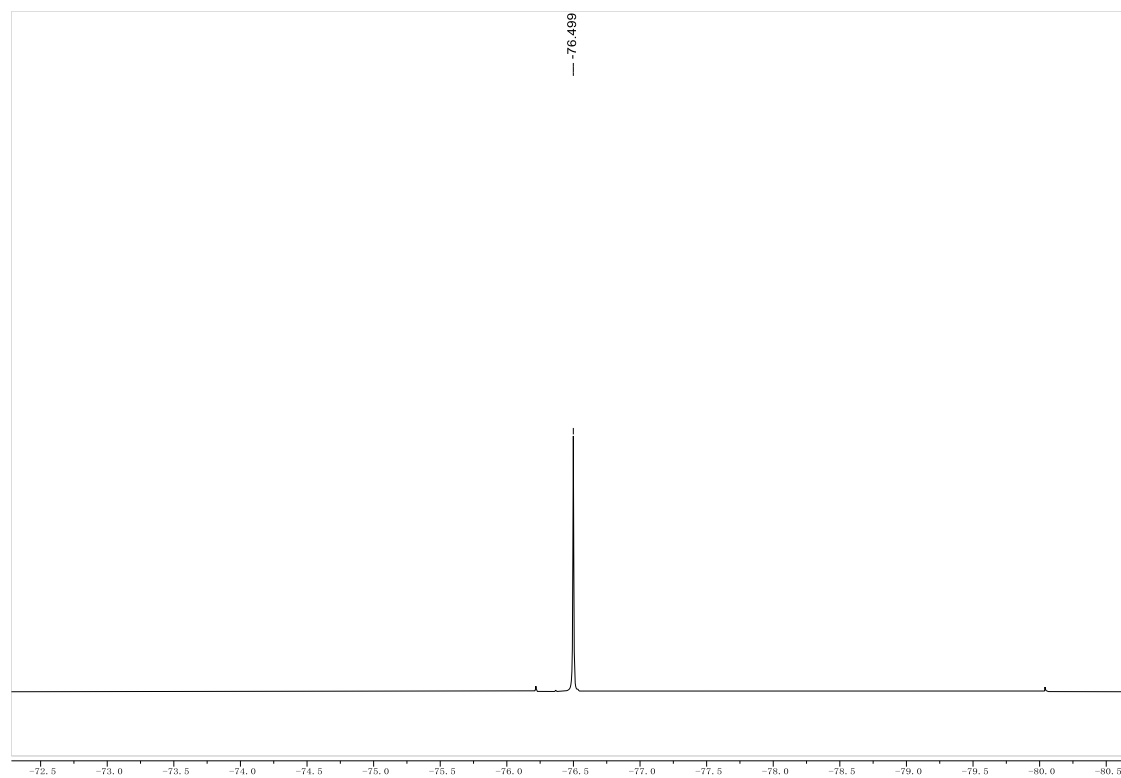

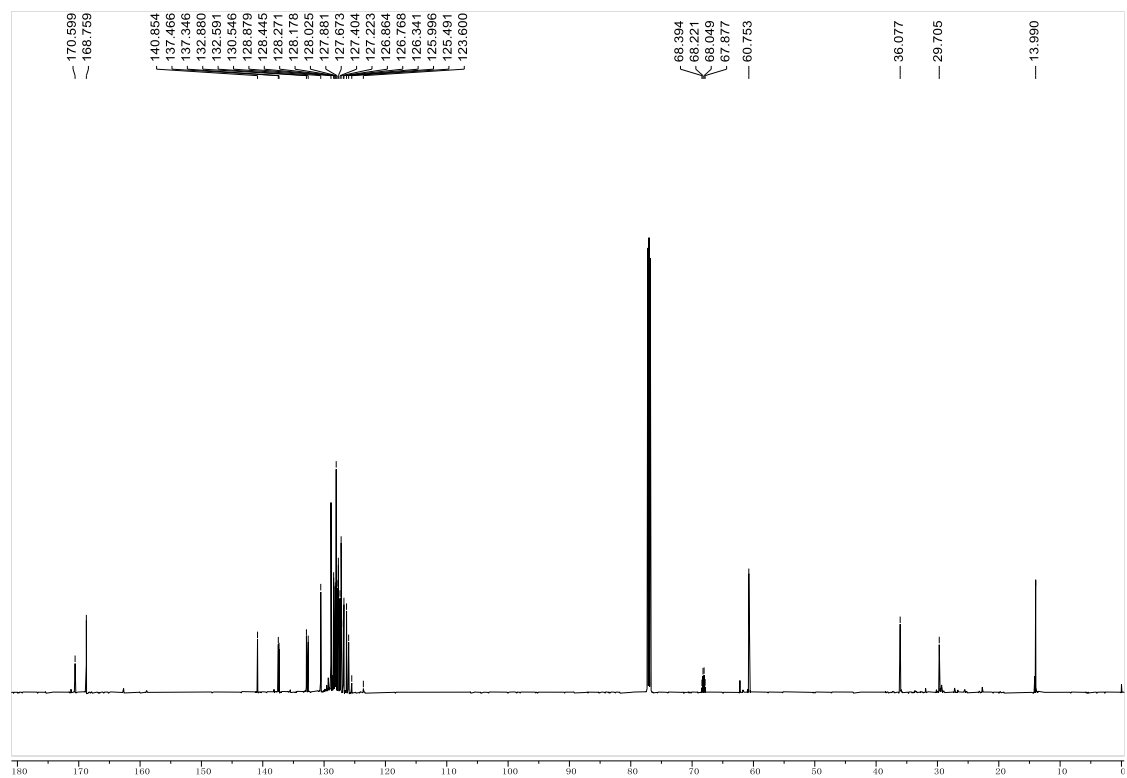

**<sup>1</sup>H NMR (600 MHz, CDCl<sub>3</sub>), <sup>19</sup>F NMR (565 MHz, CDCl<sub>3</sub>), <sup>13</sup>C NMR (150 MHz, CDCl<sub>3</sub>) spectrum of product 4b**

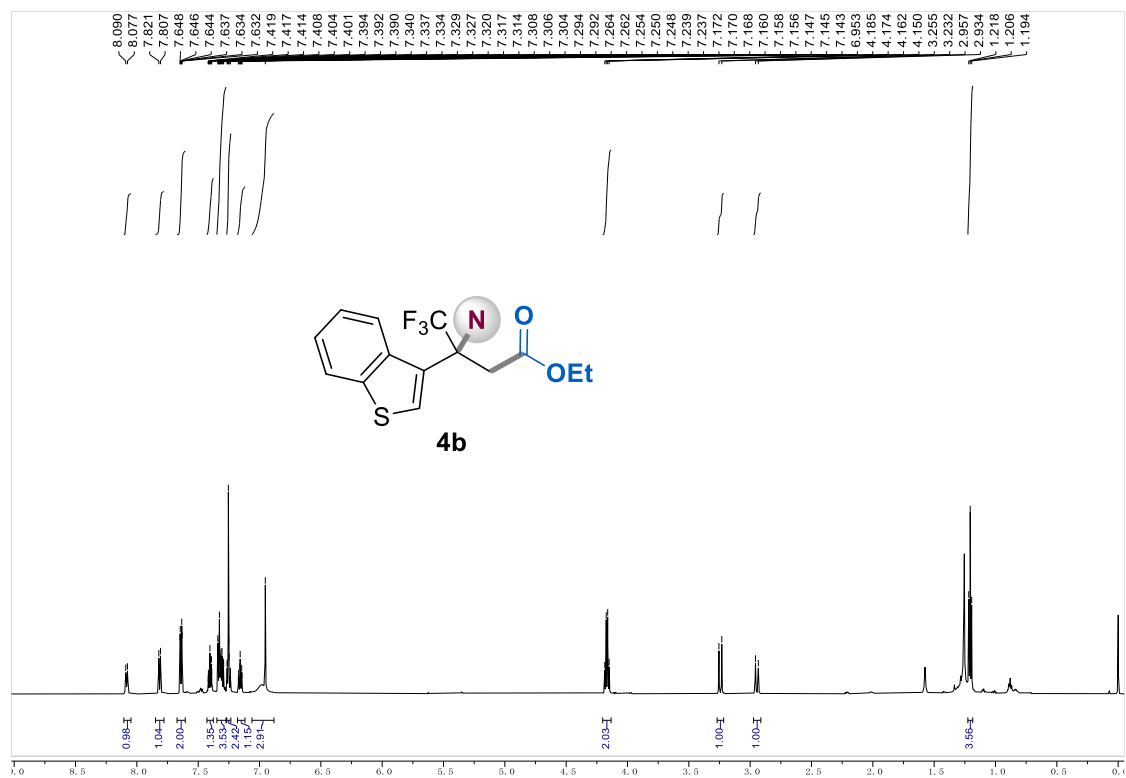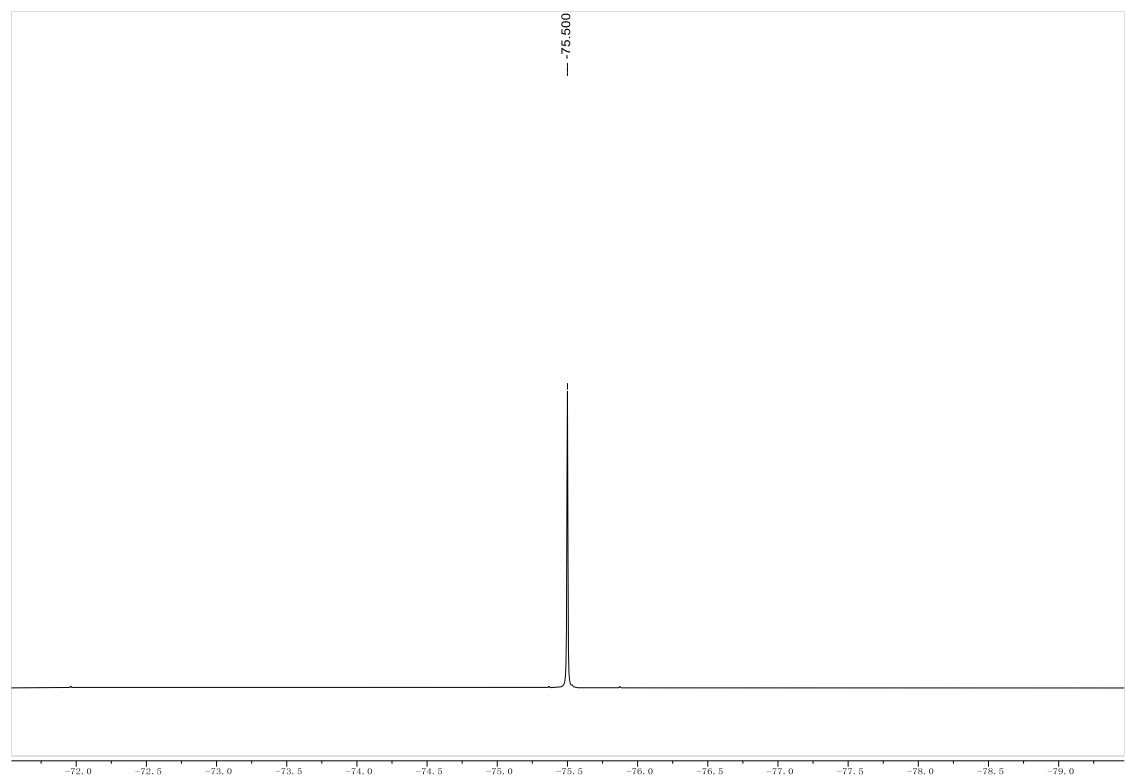



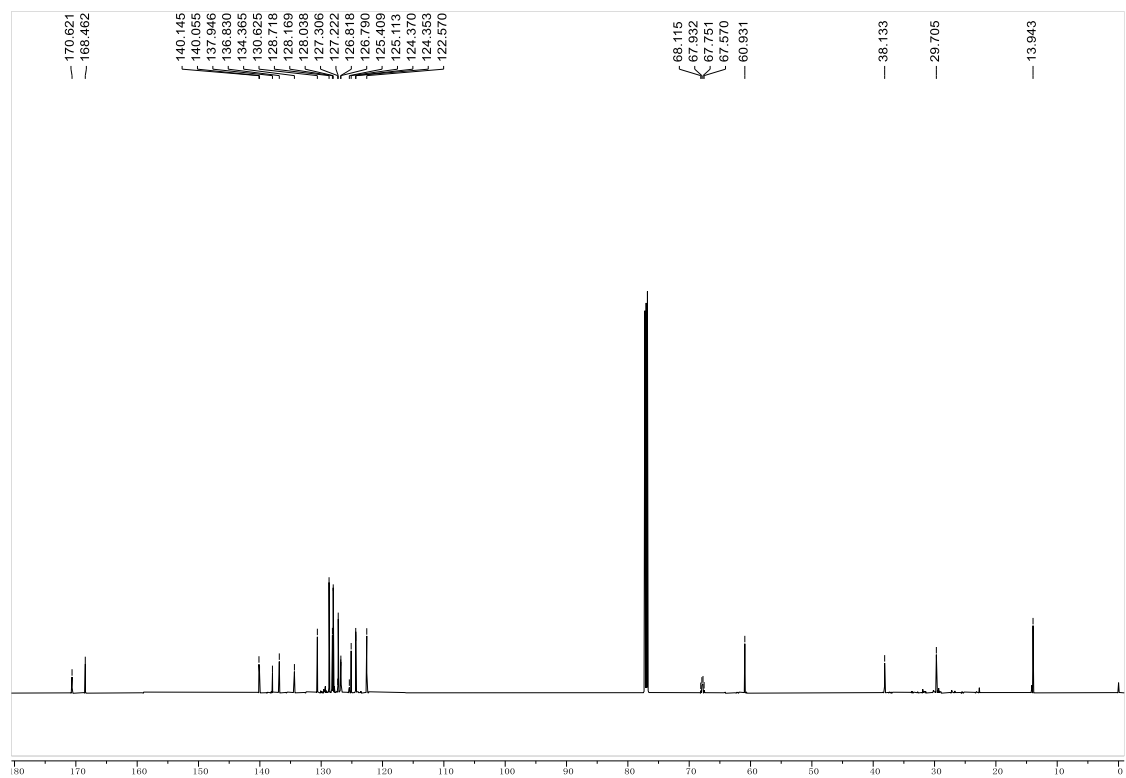

**$^1\text{H}$  NMR (600 MHz,  $\text{CDCl}_3$ ),  $^{19}\text{F}$  NMR (565 MHz,  $\text{CDCl}_3$ ),  $^{13}\text{C}$  NMR (150 MHz,  $\text{CDCl}_3$ ) spectrum of product 4c**

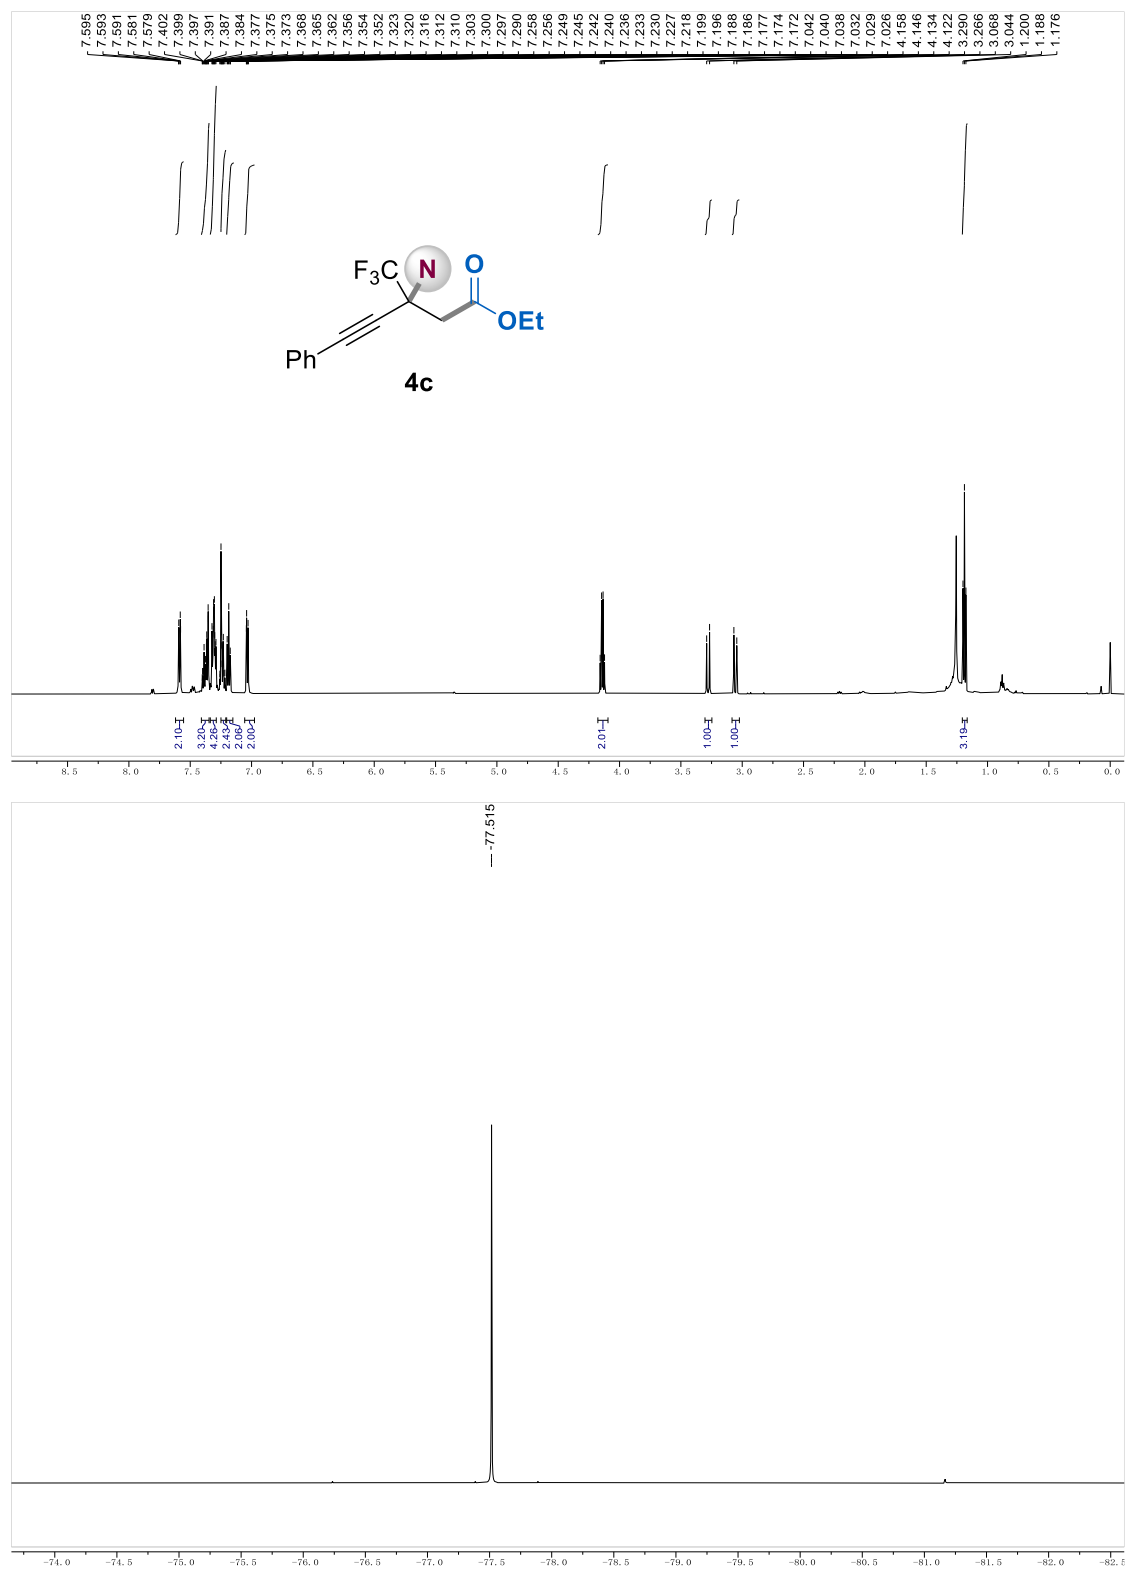

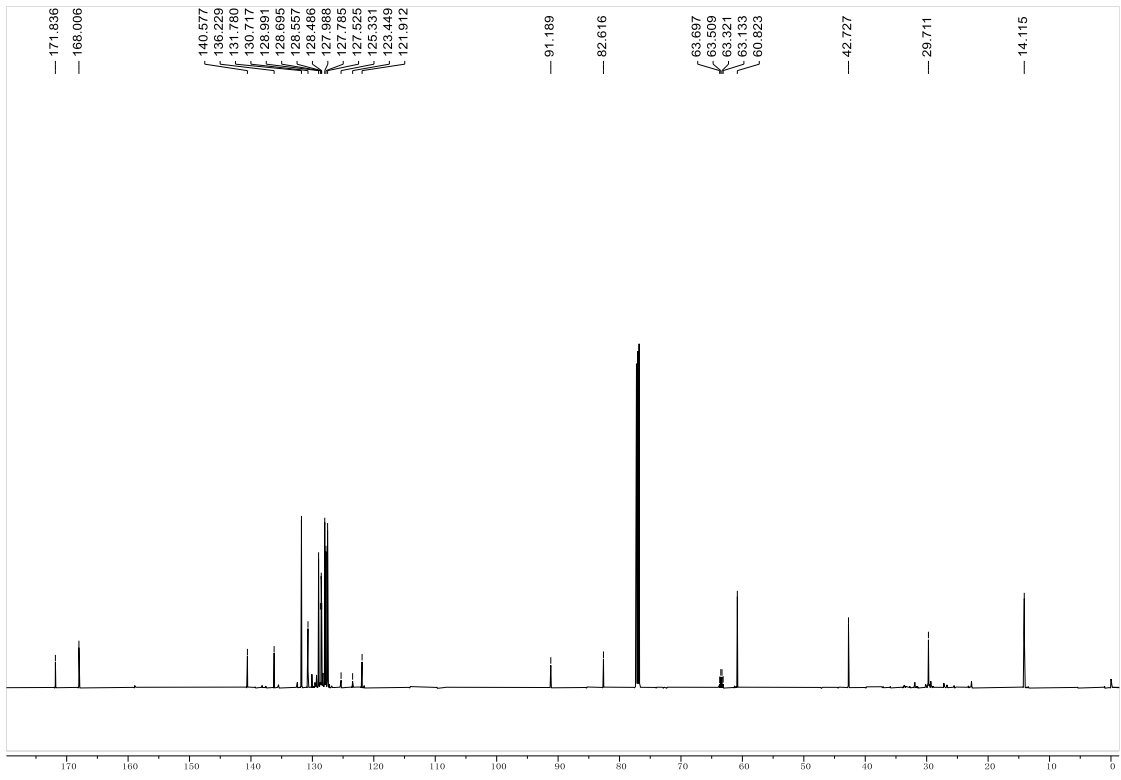

**<sup>1</sup>H NMR (400 MHz, CDCl<sub>3</sub>), <sup>19</sup>F NMR (375 MHz, CDCl<sub>3</sub>), <sup>13</sup>C NMR (100 MHz, CDCl<sub>3</sub>) spectrum of product 4d**

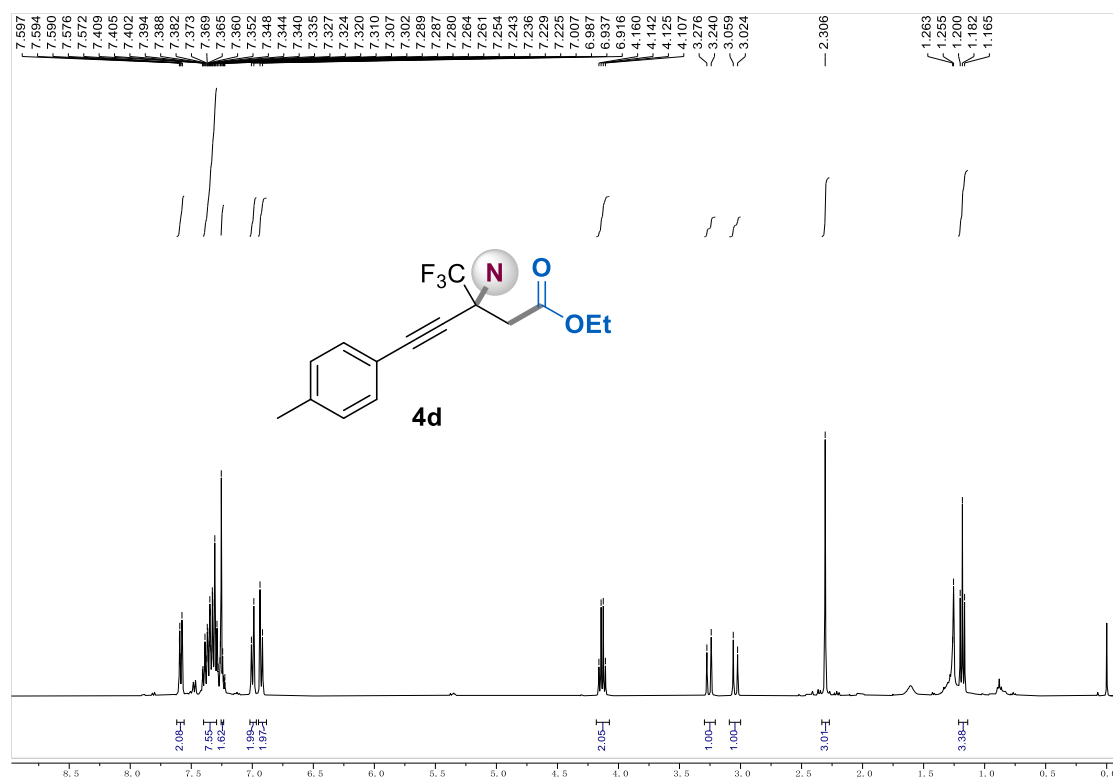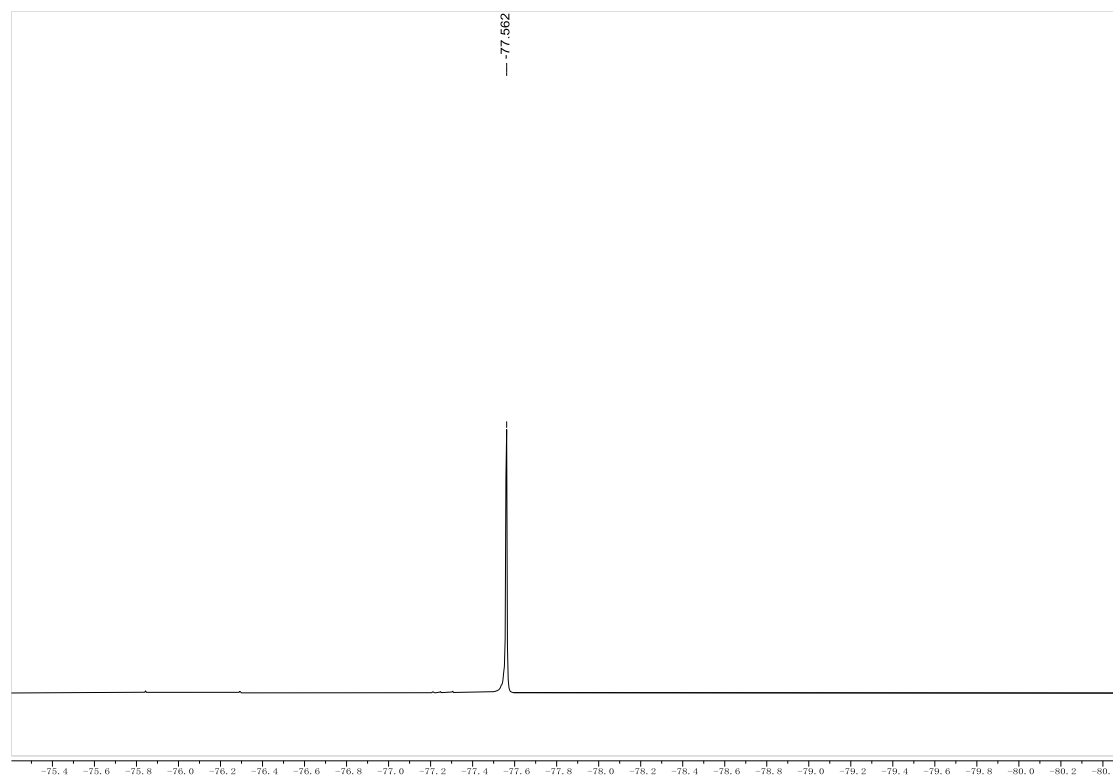

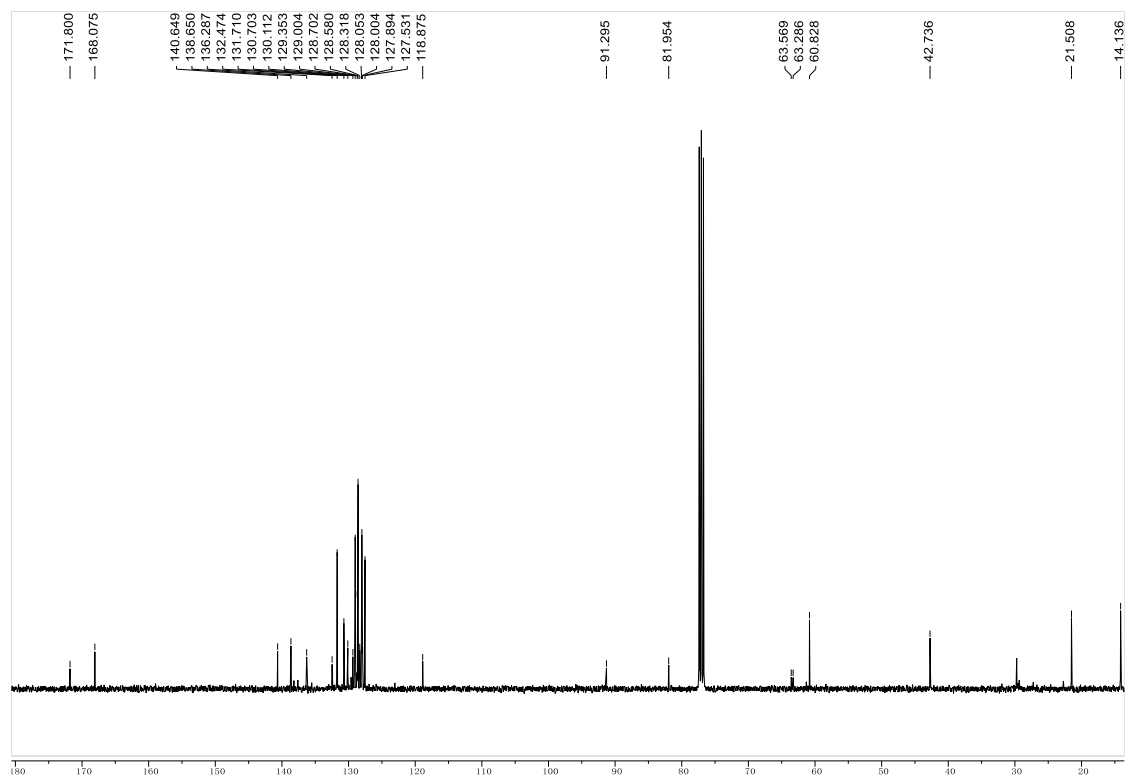

**<sup>1</sup>H NMR (400 MHz, CDCl<sub>3</sub>), <sup>19</sup>F NMR (375 MHz, CDCl<sub>3</sub>), <sup>13</sup>C NMR (100 MHz, CDCl<sub>3</sub>) spectrum of product 4e**

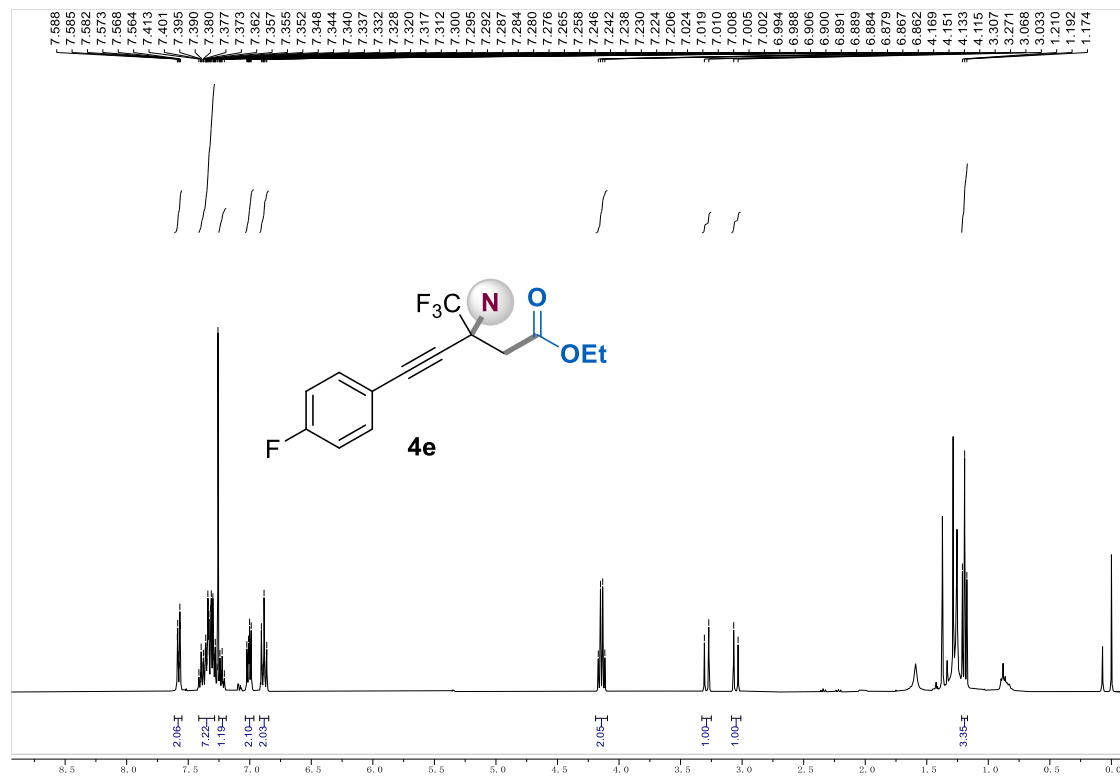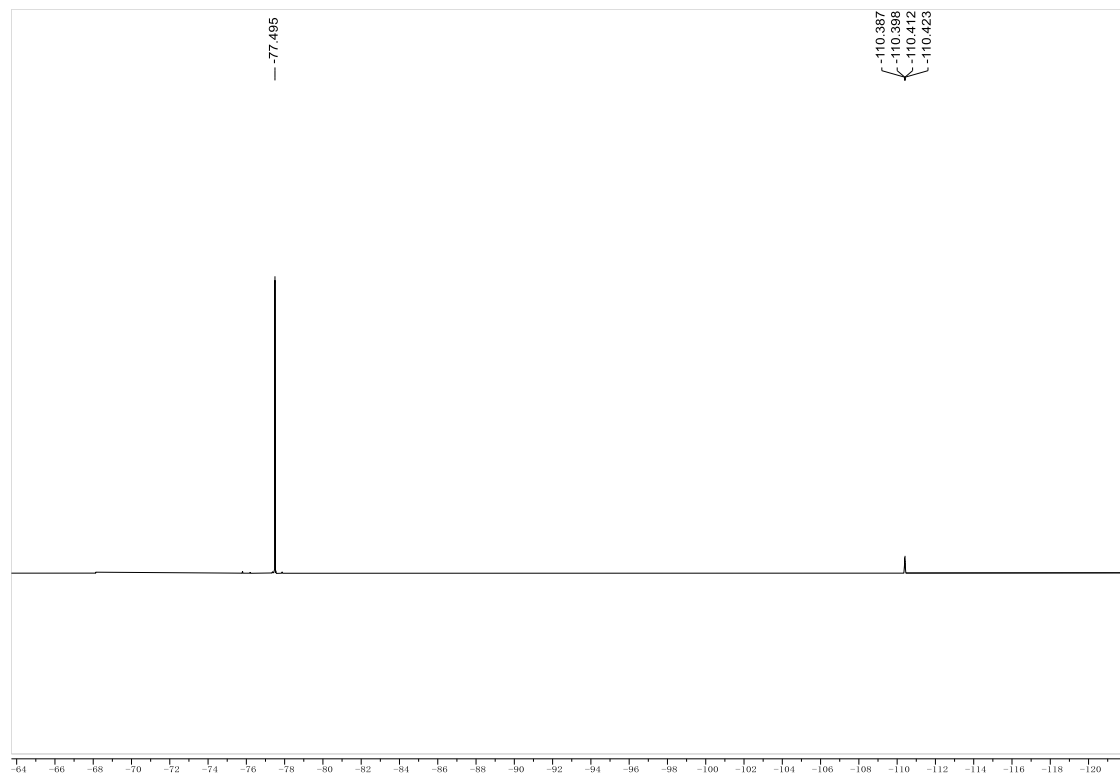

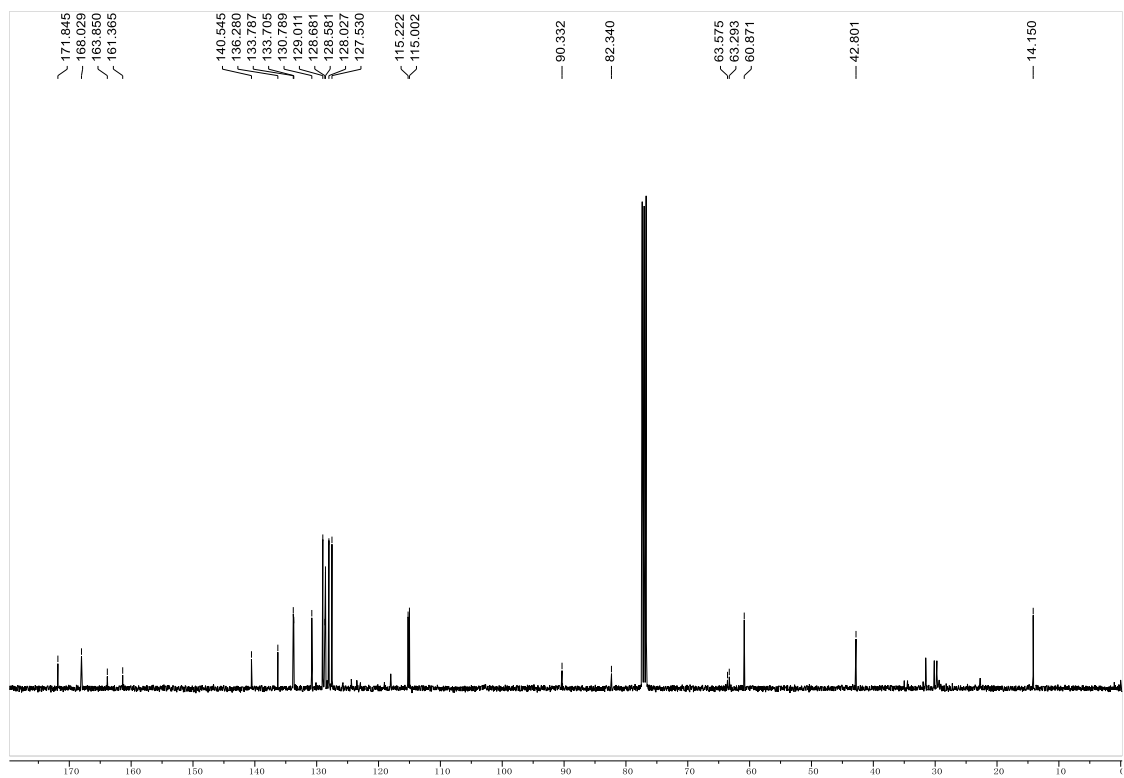

**<sup>1</sup>H NMR (400 MHz, CDCl<sub>3</sub>), <sup>19</sup>F NMR (375 MHz, CDCl<sub>3</sub>), <sup>13</sup>C NMR (100 MHz, CDCl<sub>3</sub>) spectrum of product 4f**

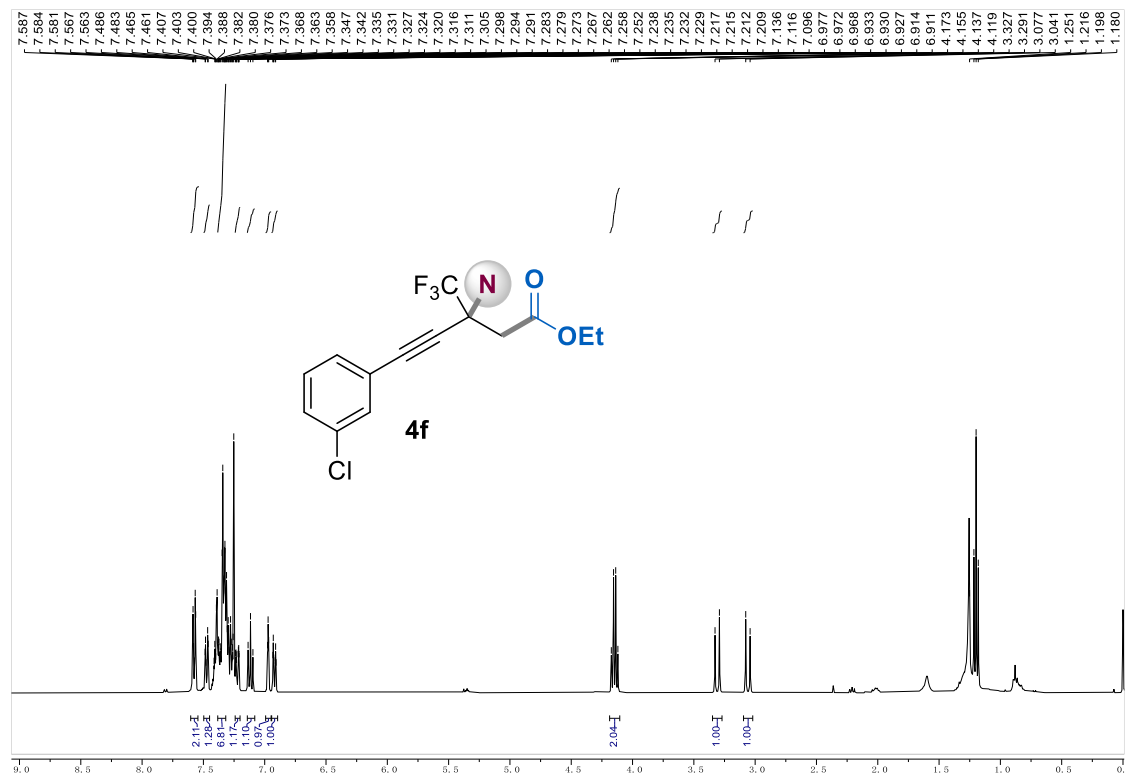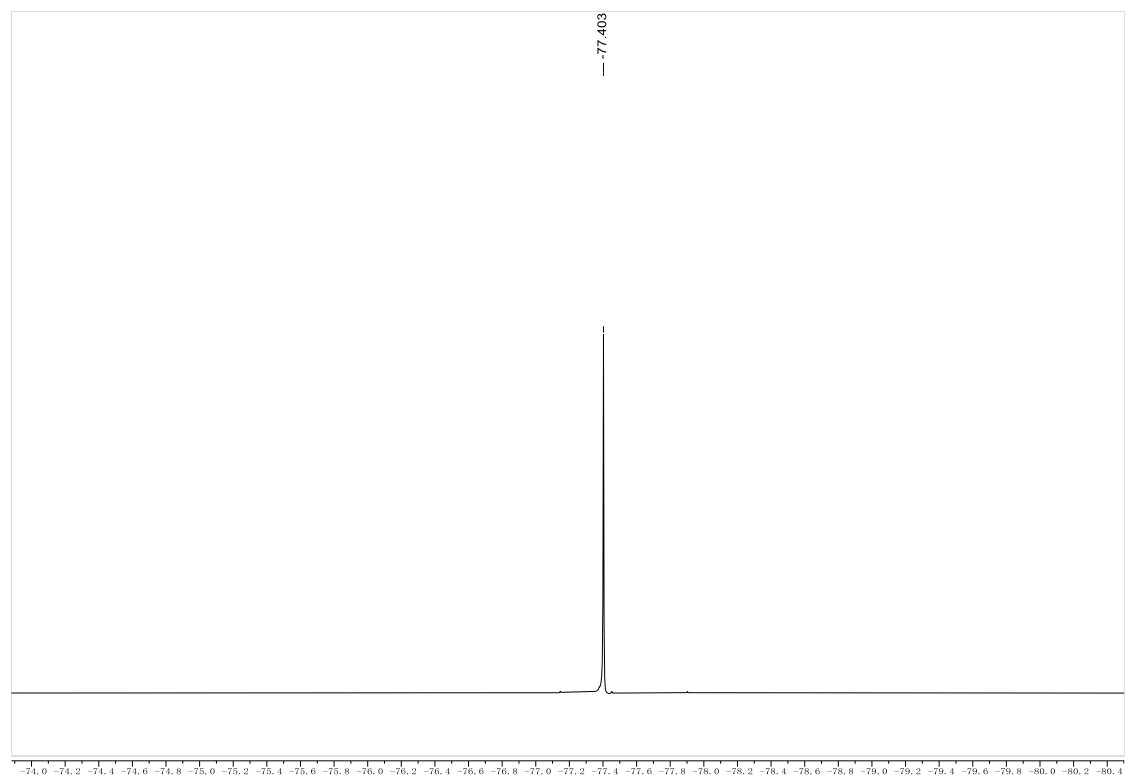



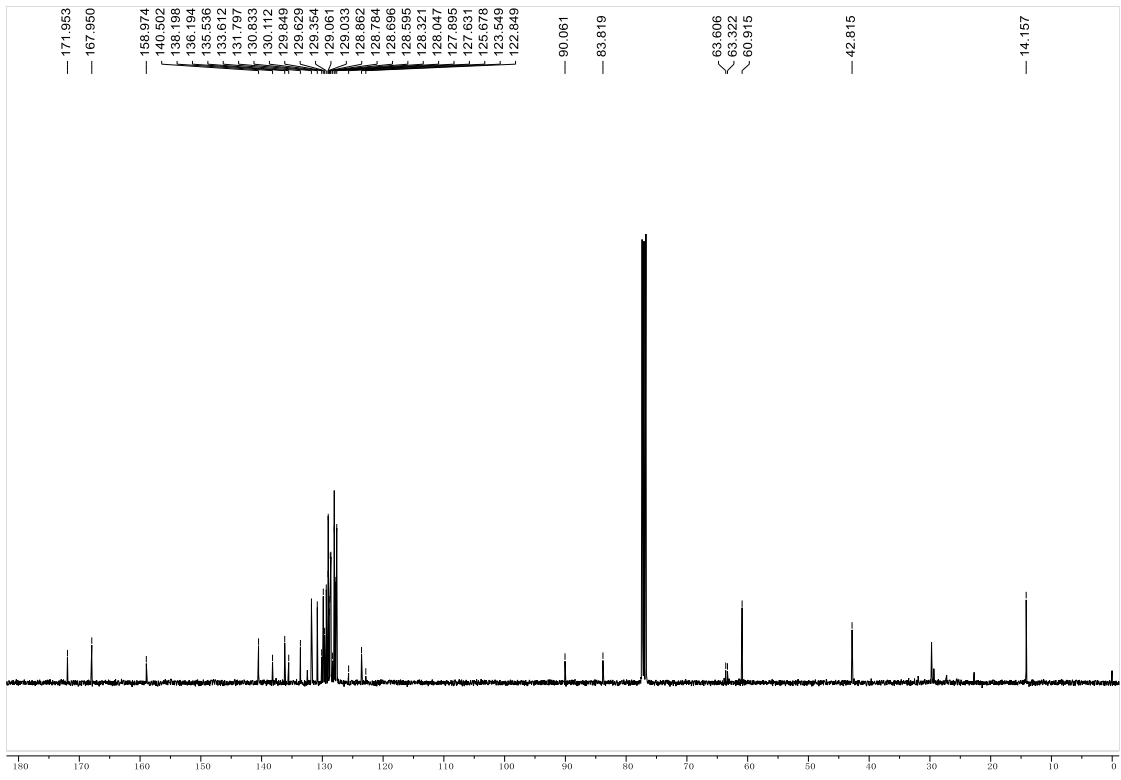

**<sup>1</sup>H NMR (400 MHz, CDCl<sub>3</sub>), <sup>19</sup>F NMR (375 MHz, CDCl<sub>3</sub>), <sup>13</sup>C NMR (100 MHz, CDCl<sub>3</sub>) spectrum of product 4g**

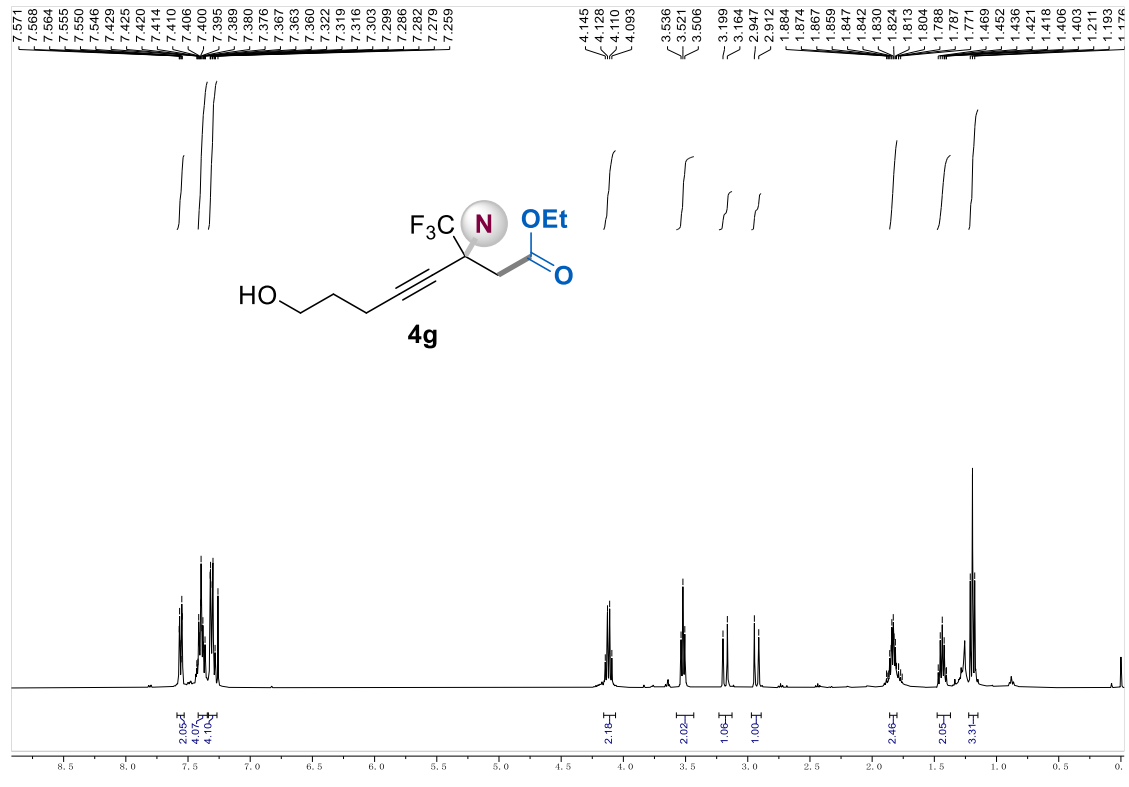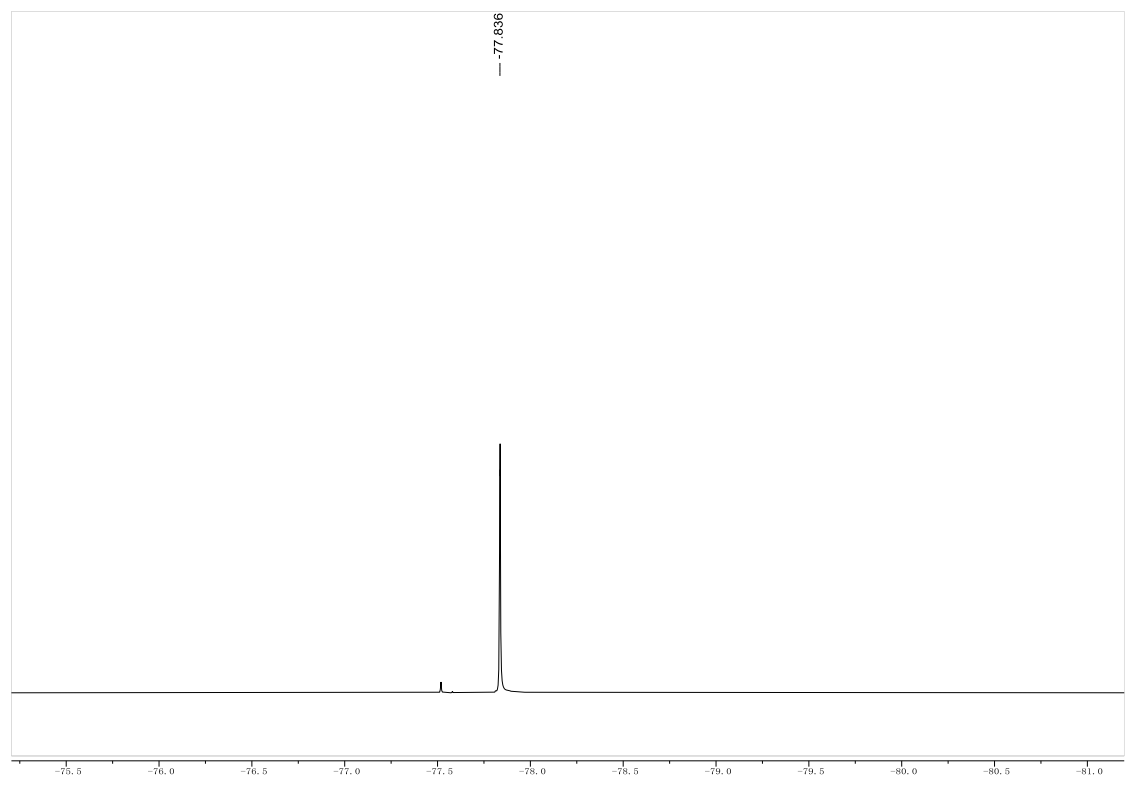

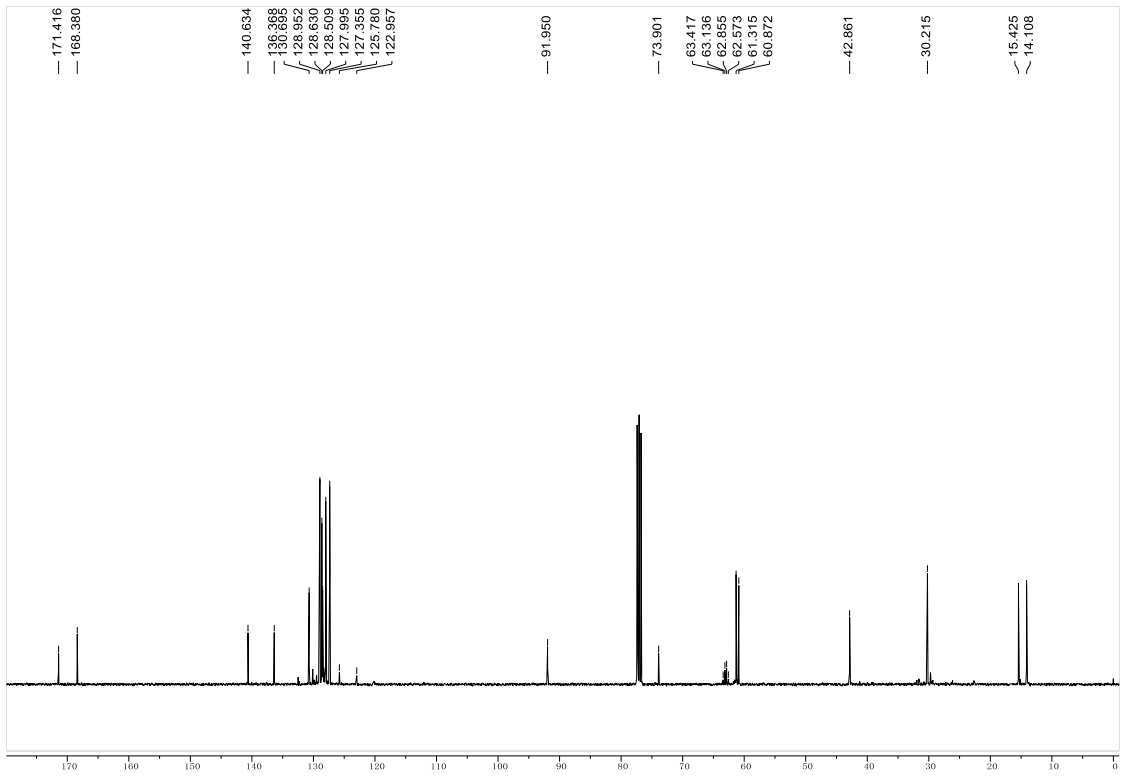

**<sup>1</sup>H NMR (400 MHz, CDCl<sub>3</sub>), <sup>19</sup>F NMR (375 MHz, CDCl<sub>3</sub>), <sup>13</sup>C NMR (100 MHz, CDCl<sub>3</sub>) spectrum of product 4h**

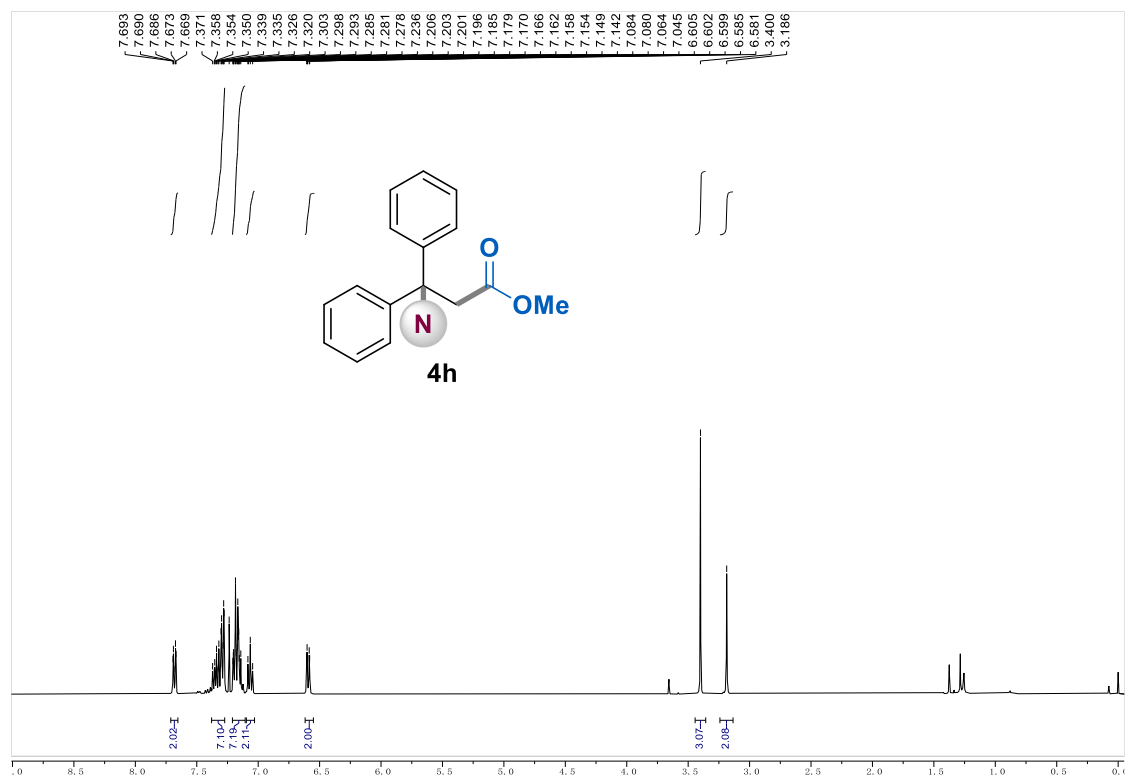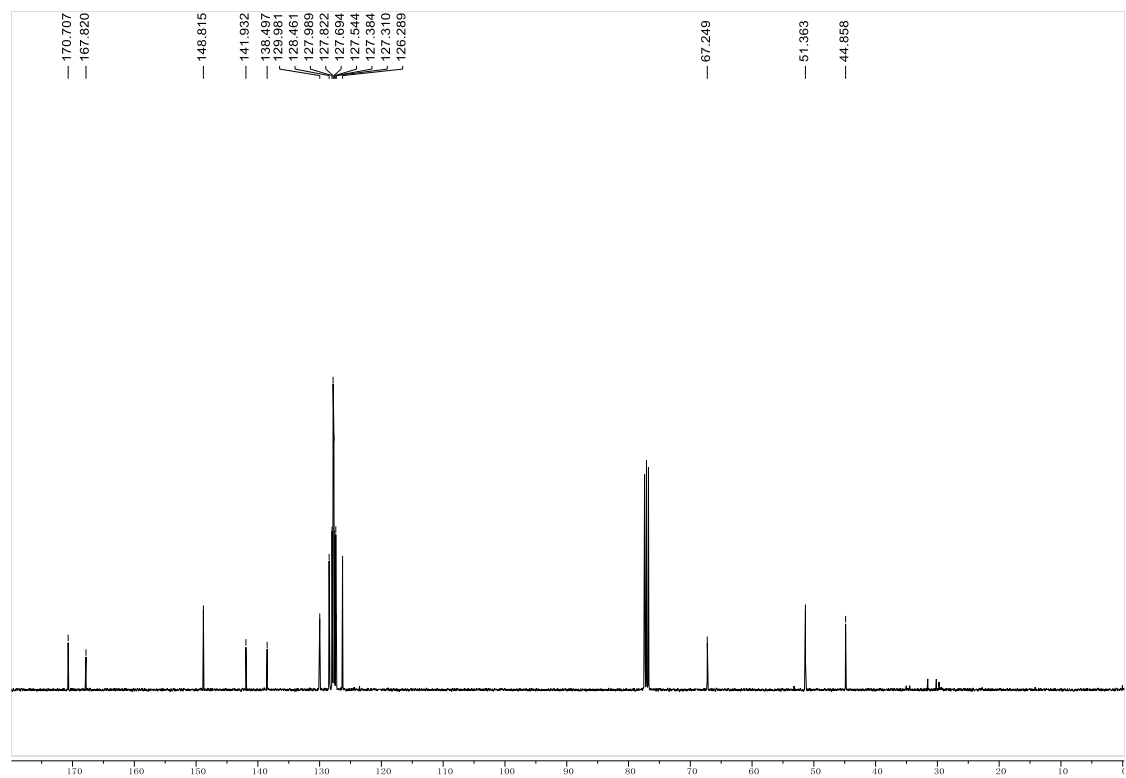

**<sup>1</sup>H NMR (400 MHz, CDCl<sub>3</sub>), <sup>19</sup>F NMR (375 MHz, CDCl<sub>3</sub>), <sup>13</sup>C NMR (100 MHz, CDCl<sub>3</sub>) spectrum of product 4i**

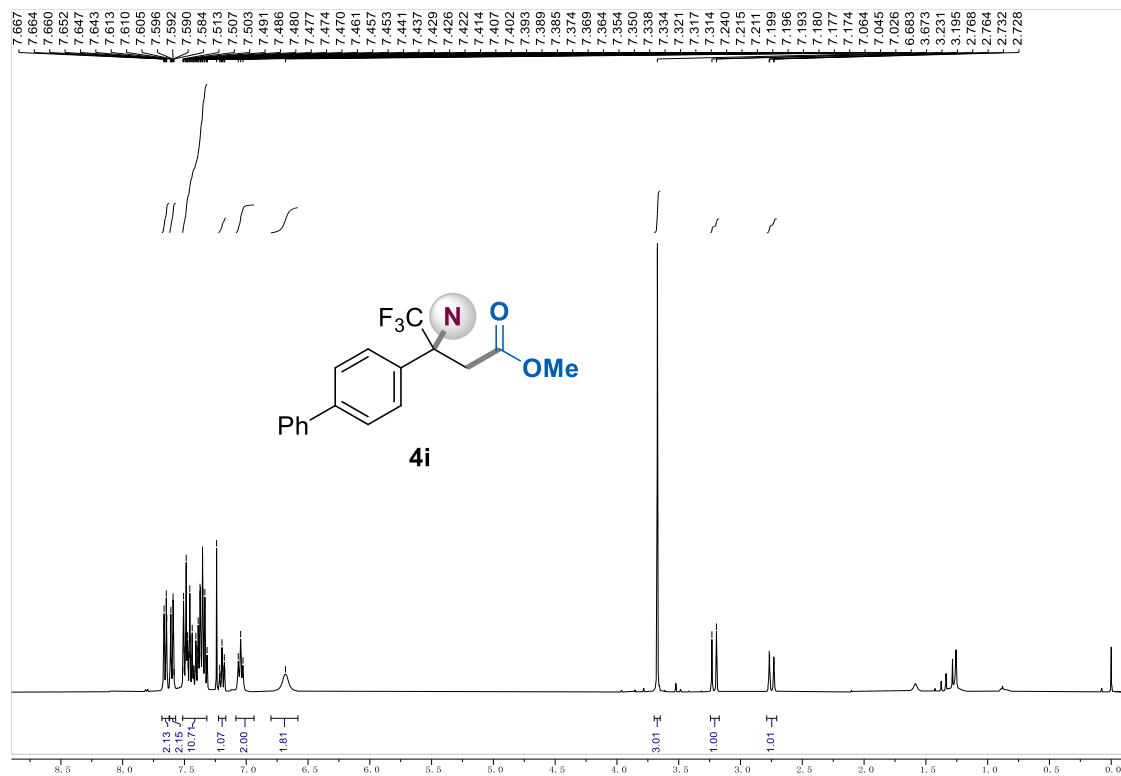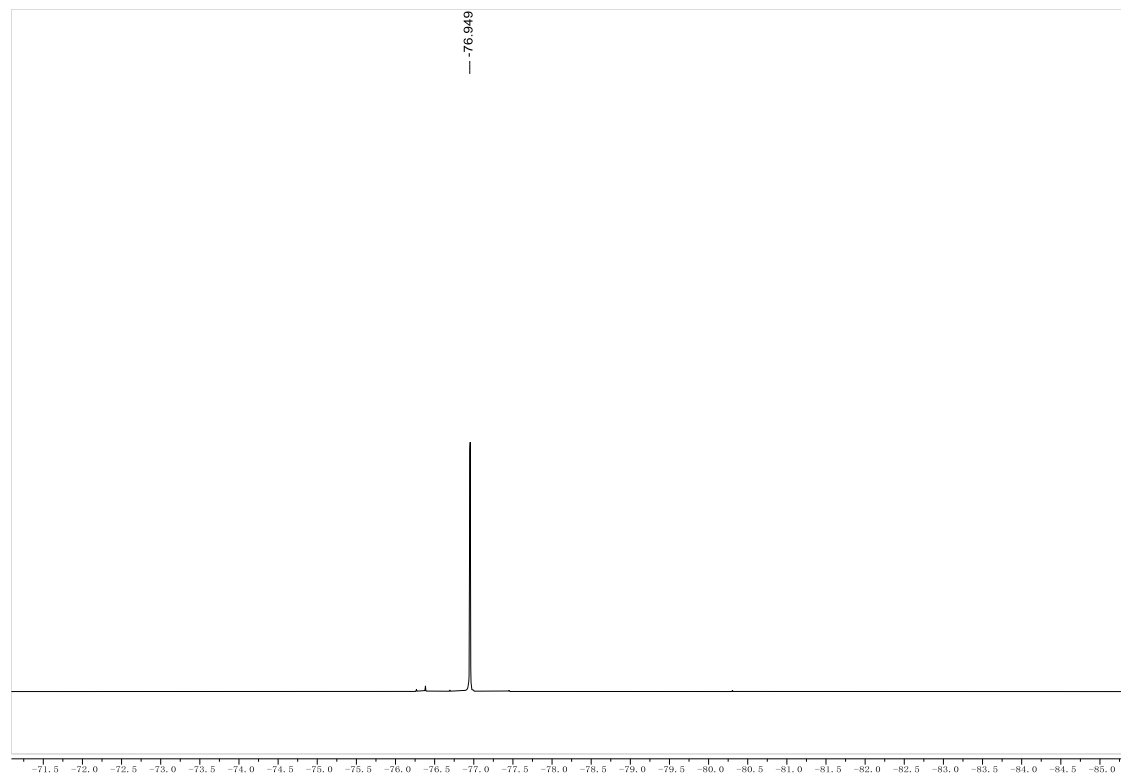

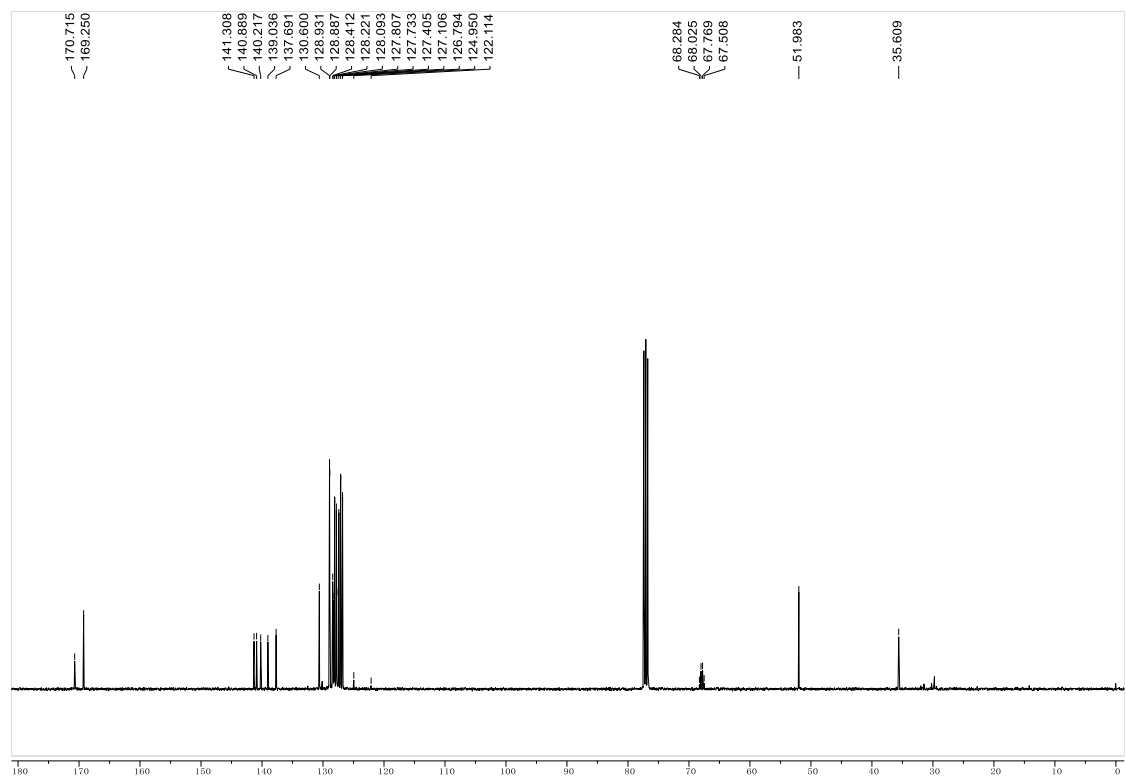

**<sup>1</sup>H NMR (400 MHz, CDCl<sub>3</sub>), <sup>19</sup>F NMR (375 MHz, CDCl<sub>3</sub>), <sup>13</sup>C NMR (100 MHz, CDCl<sub>3</sub>) spectrum of product 4j**

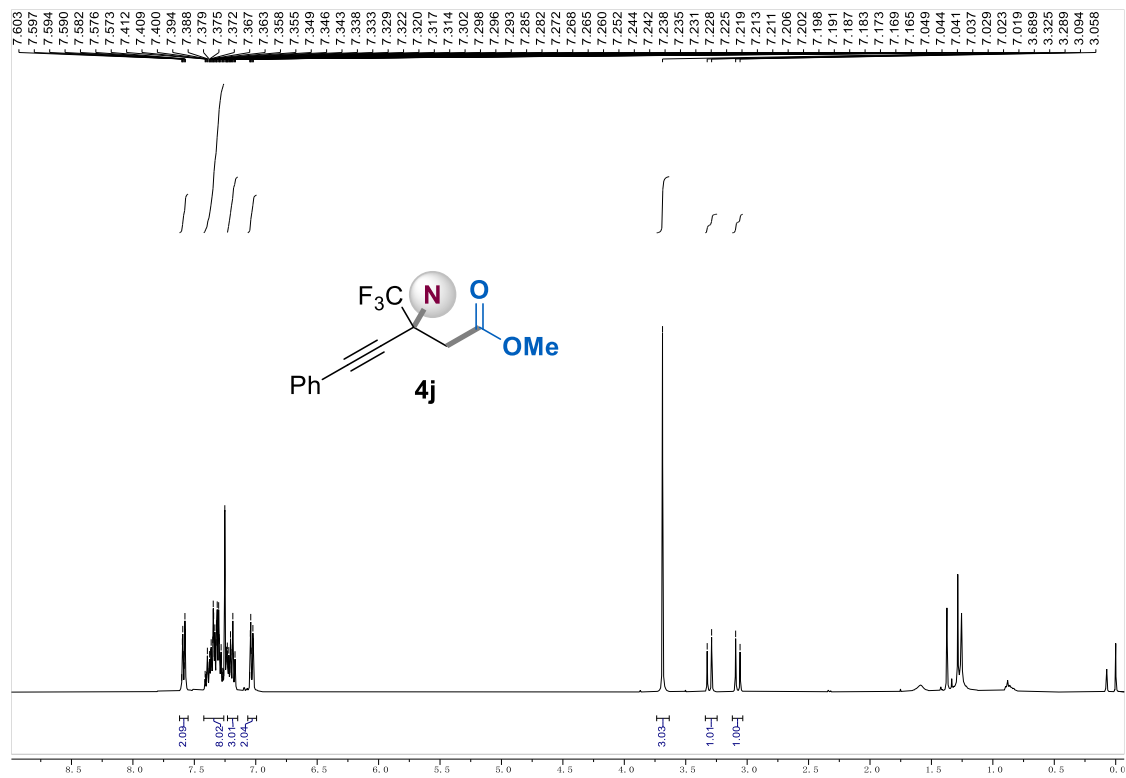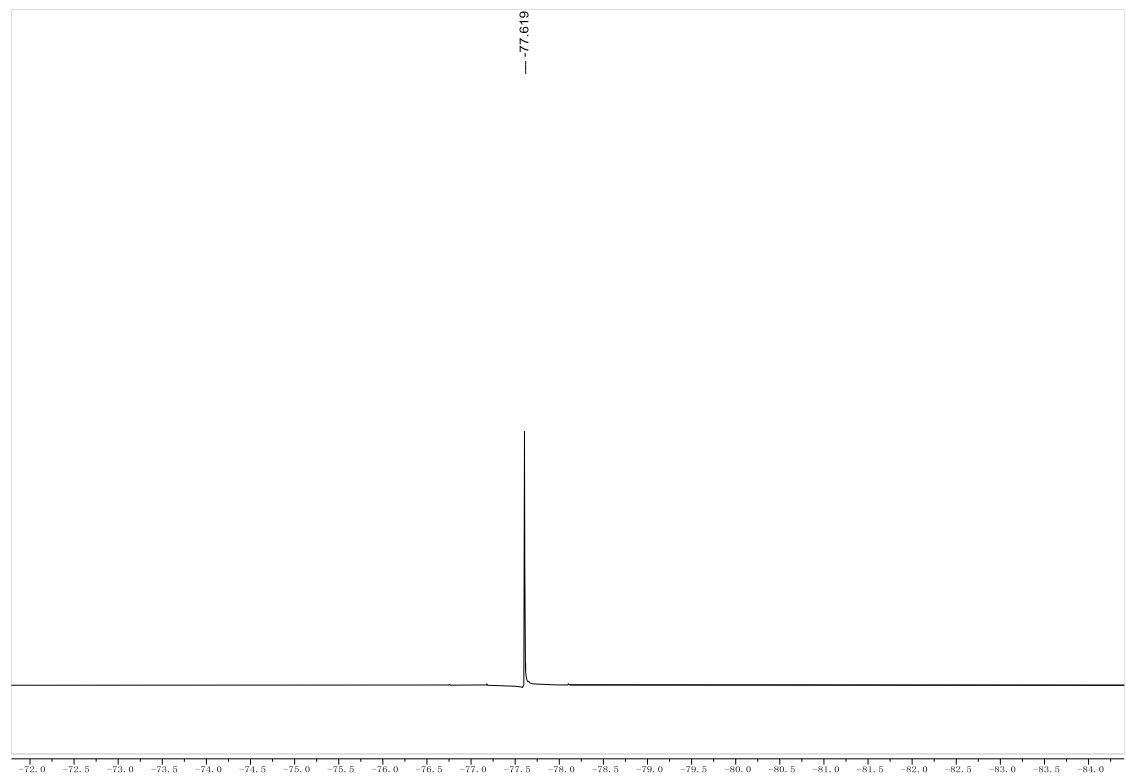

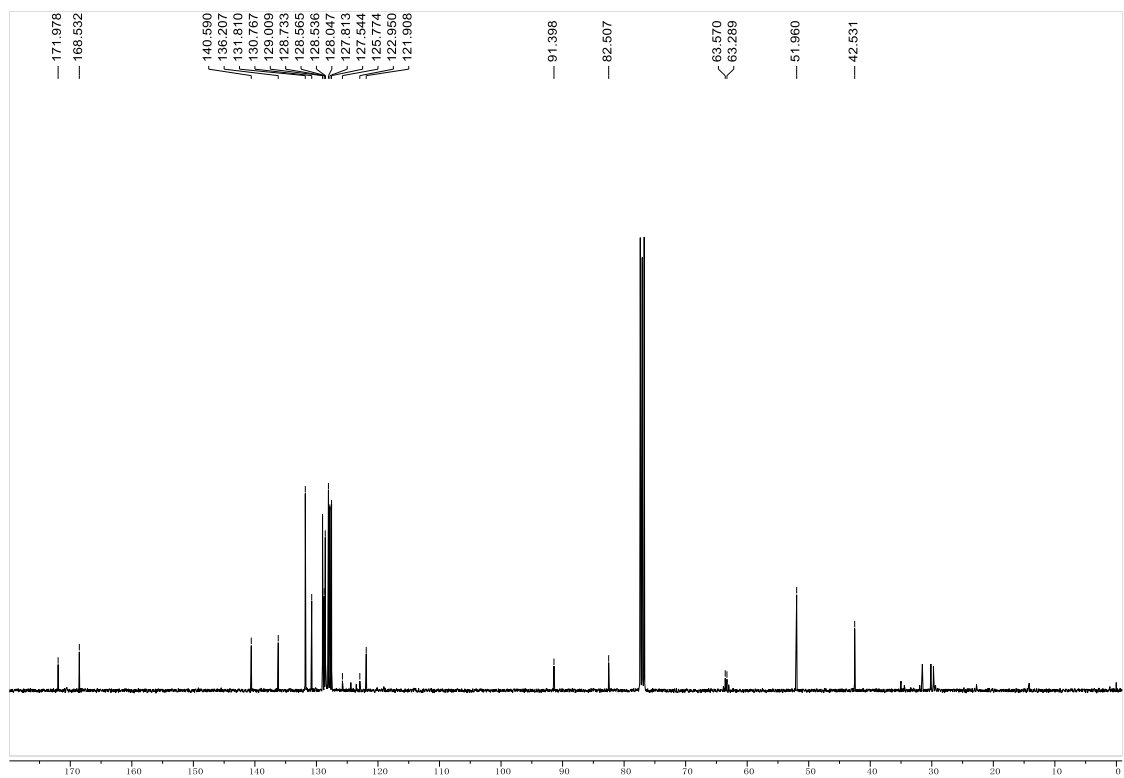



**<sup>1</sup>H NMR (400 MHz, CDCl<sub>3</sub>), <sup>19</sup>F NMR (375 MHz, CDCl<sub>3</sub>), <sup>13</sup>C NMR (100 MHz, CDCl<sub>3</sub>) spectrum of product 4k**

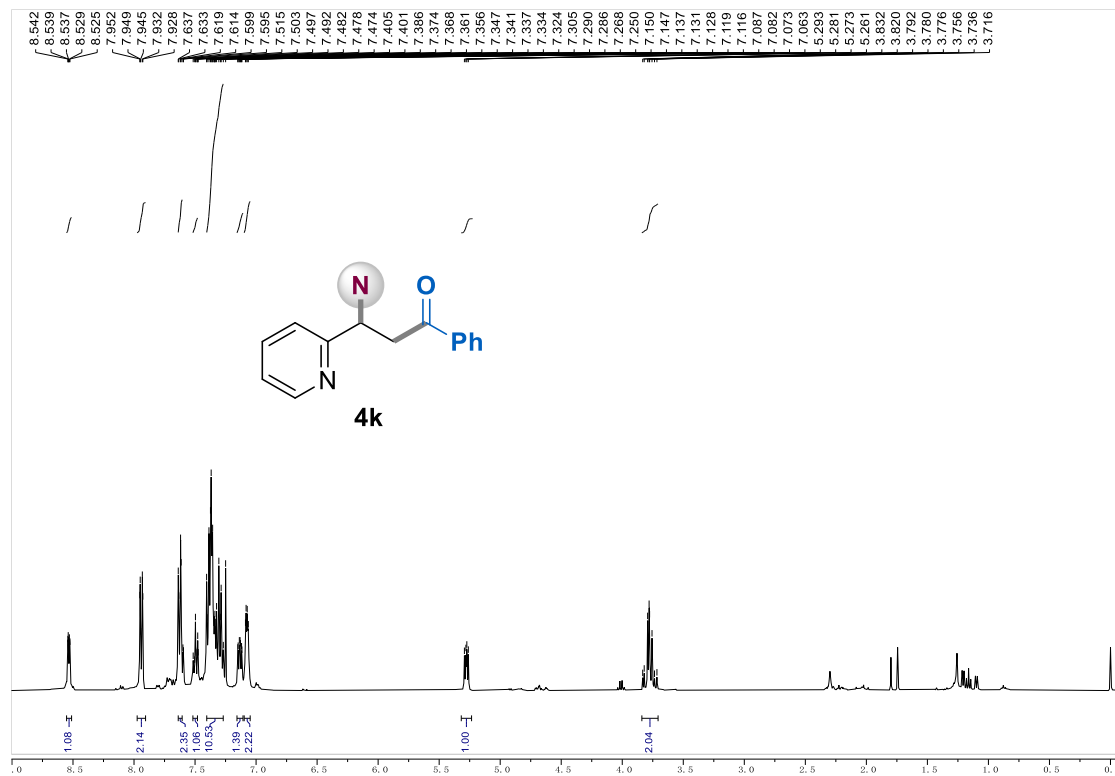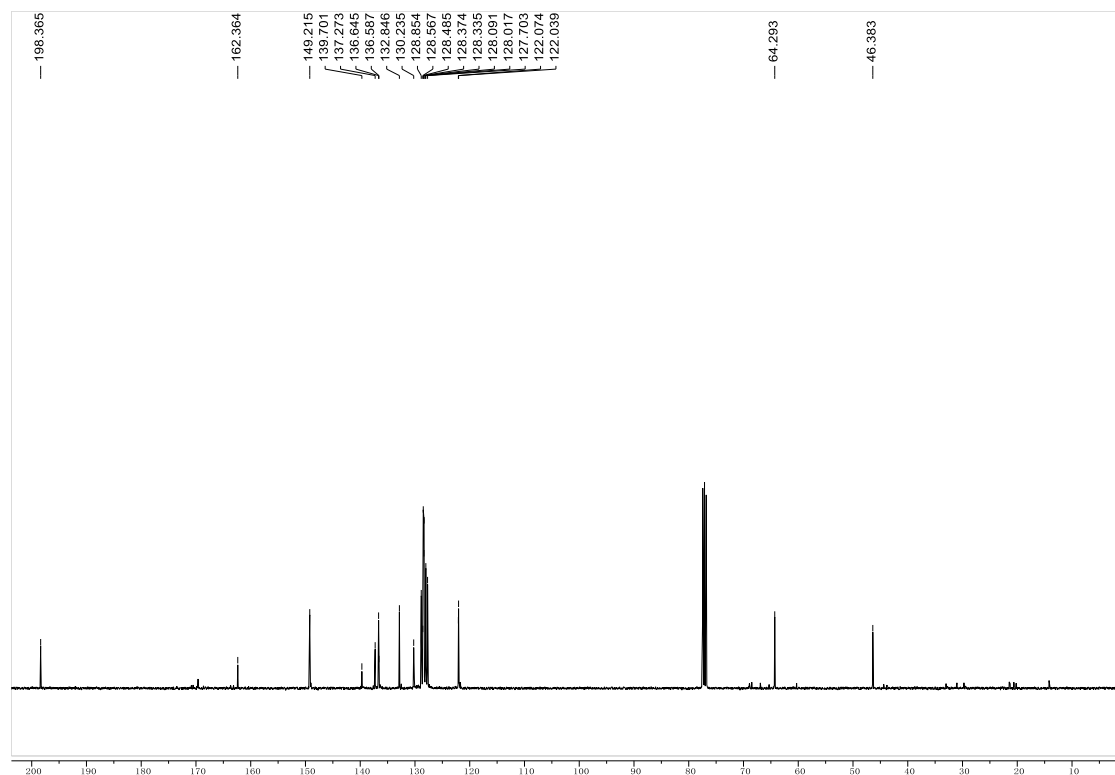

**<sup>1</sup>H NMR (400 MHz, CDCl<sub>3</sub>), <sup>19</sup>F NMR (375 MHz, CDCl<sub>3</sub>), <sup>13</sup>C NMR (100 MHz, CDCl<sub>3</sub>) spectrum of product 4I**

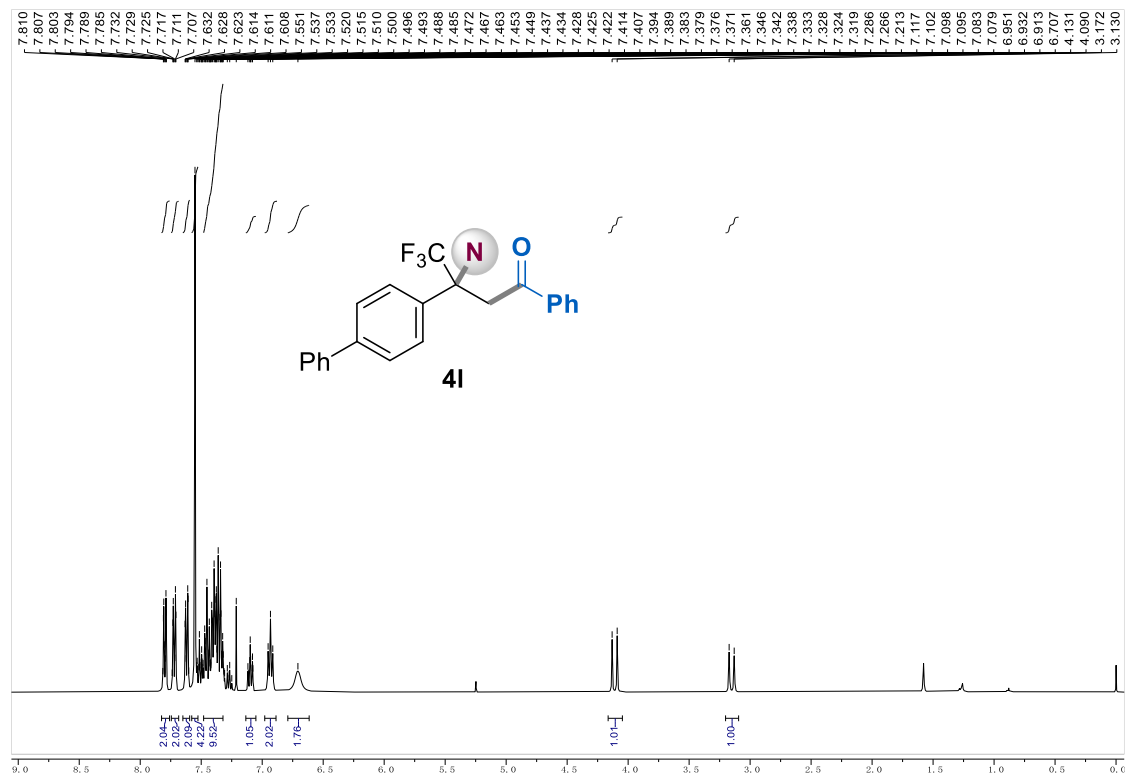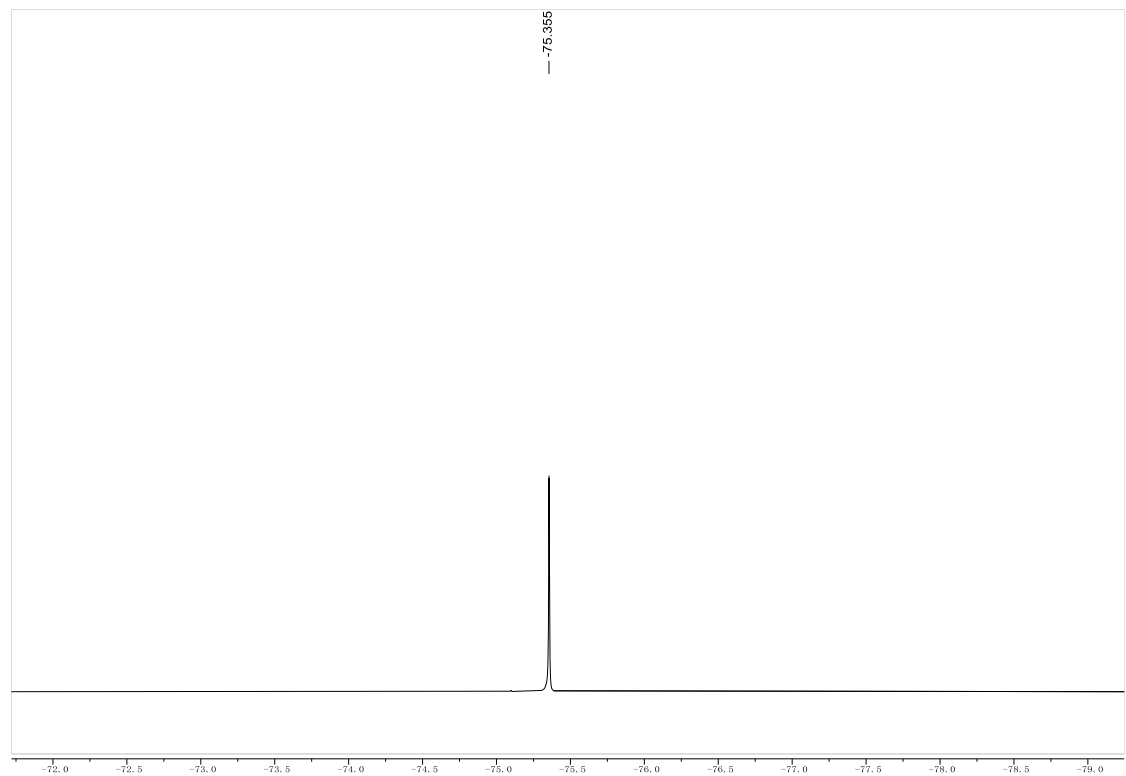

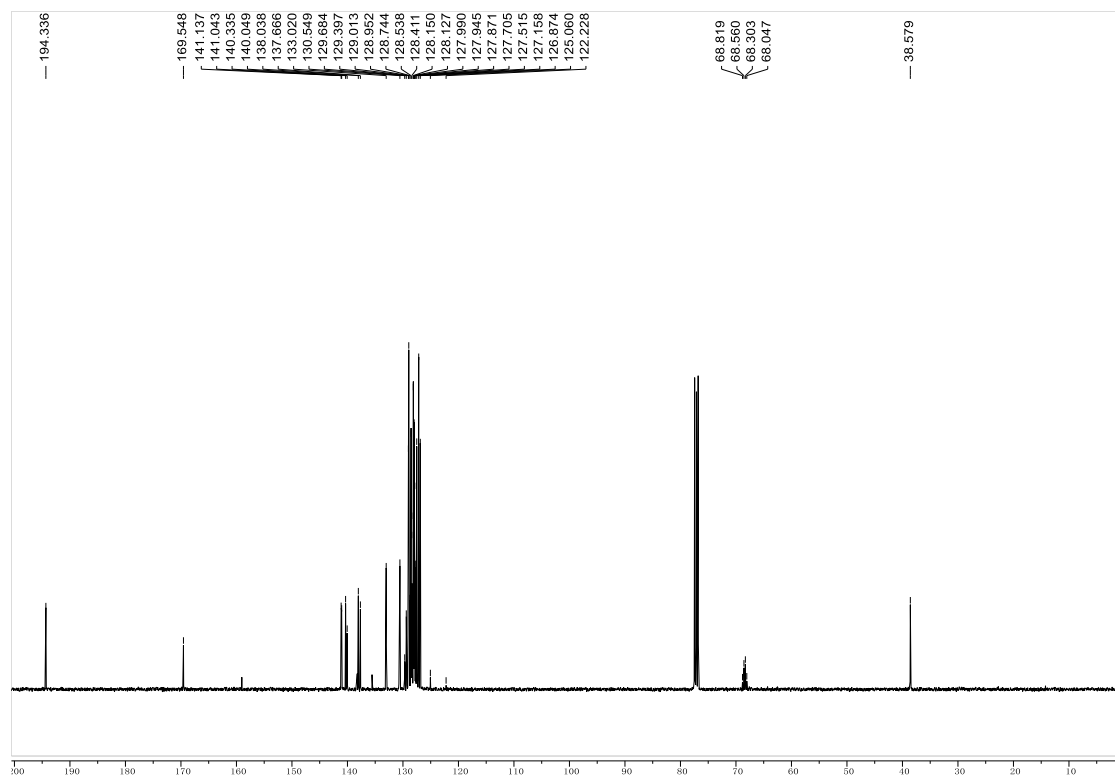

**<sup>1</sup>H NMR (400 MHz, CDCl<sub>3</sub>), <sup>19</sup>F NMR (375 MHz, CDCl<sub>3</sub>), <sup>13</sup>C NMR (100 MHz, CDCl<sub>3</sub>) spectrum of product 4m**

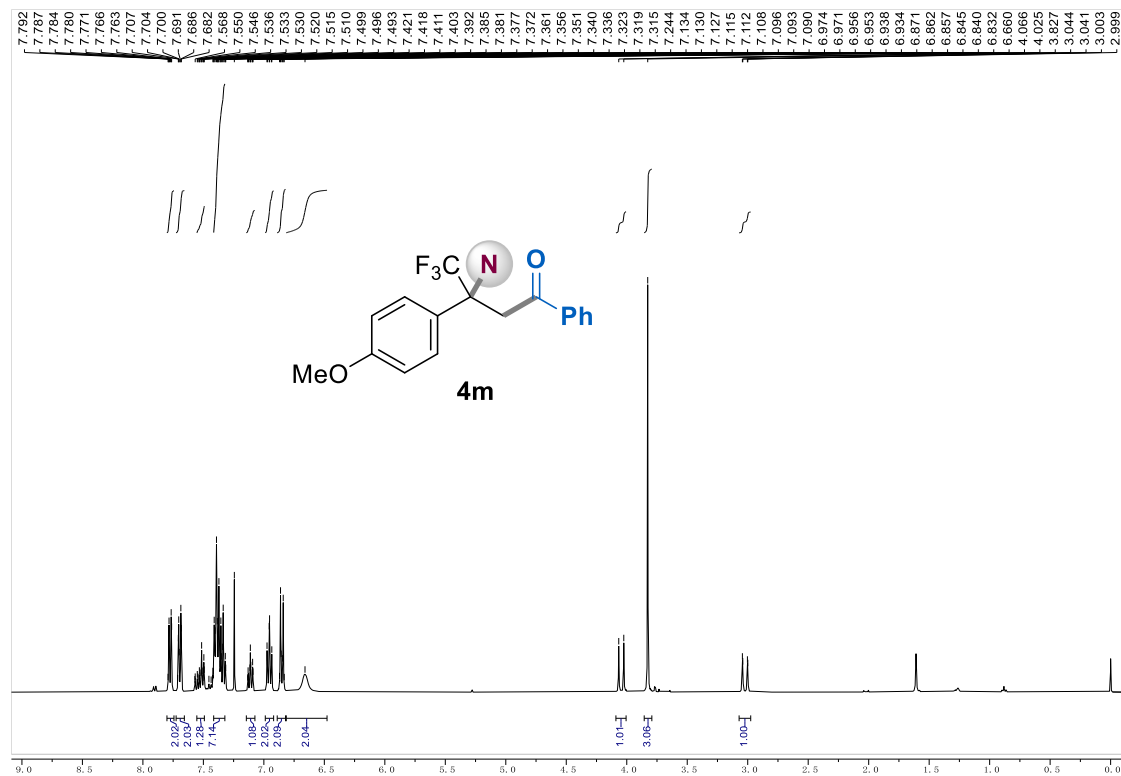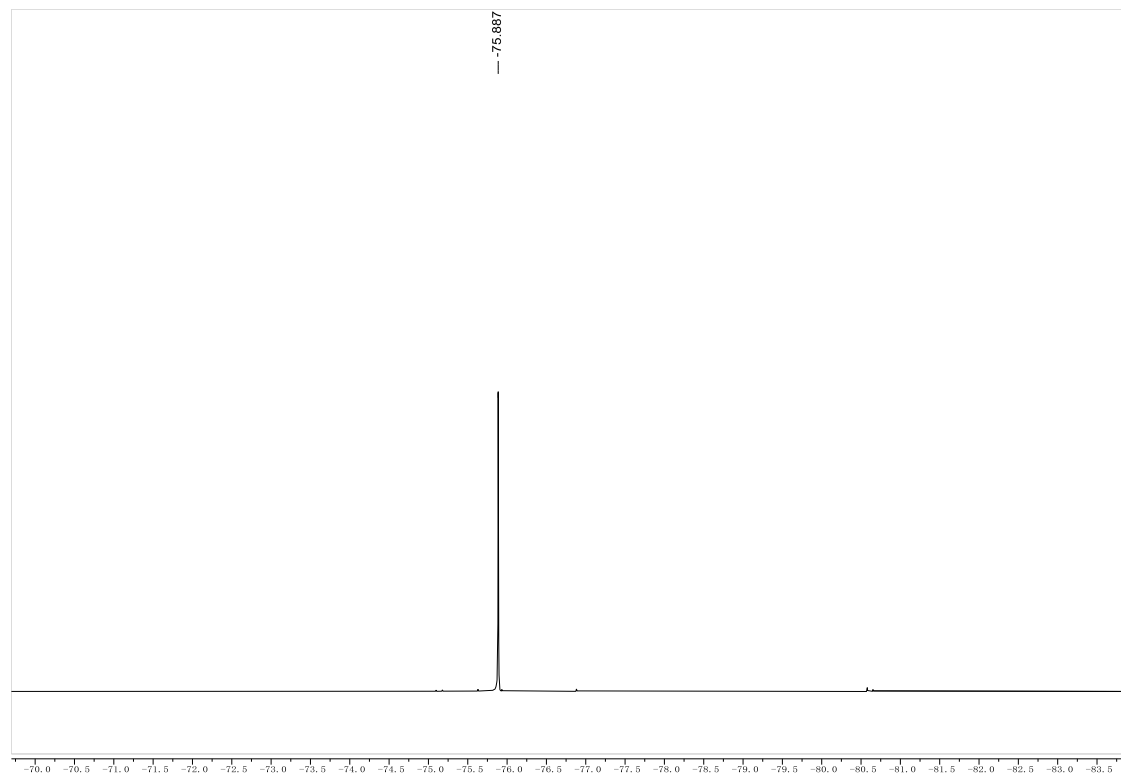

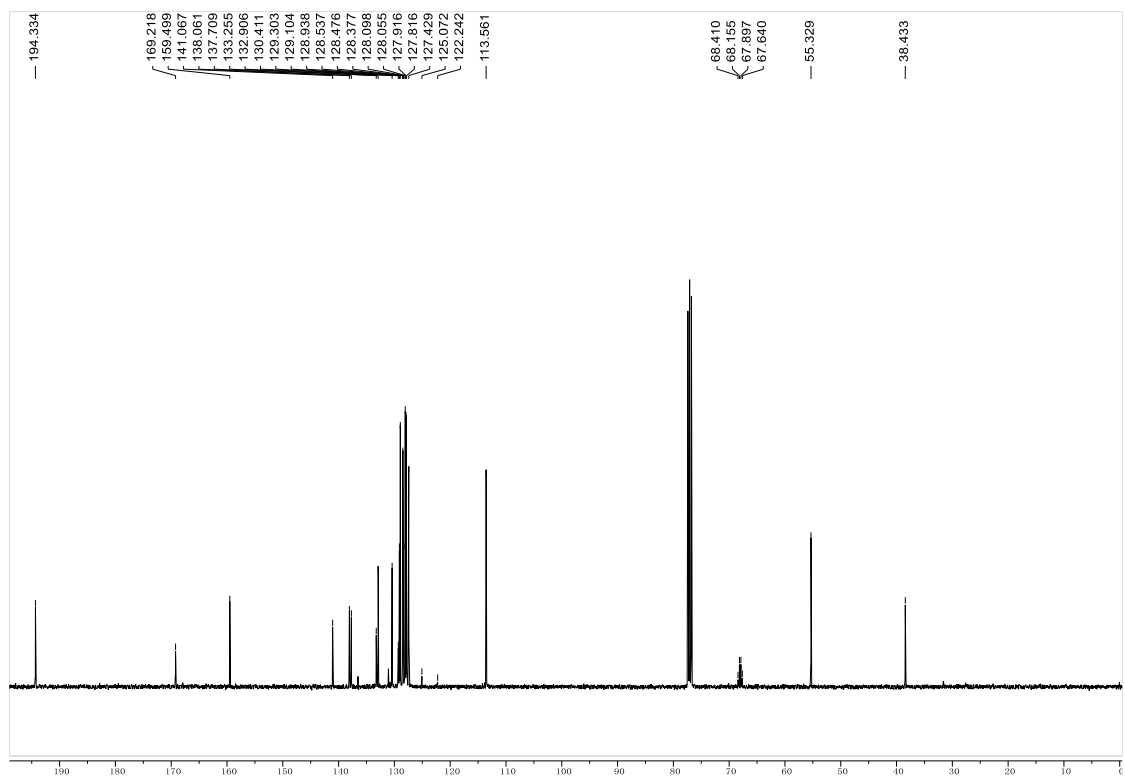

**<sup>1</sup>H NMR (400 MHz, CDCl<sub>3</sub>), <sup>19</sup>F NMR (375 MHz, CDCl<sub>3</sub>), <sup>13</sup>C NMR (100 MHz, CDCl<sub>3</sub>) spectrum of product 4n**

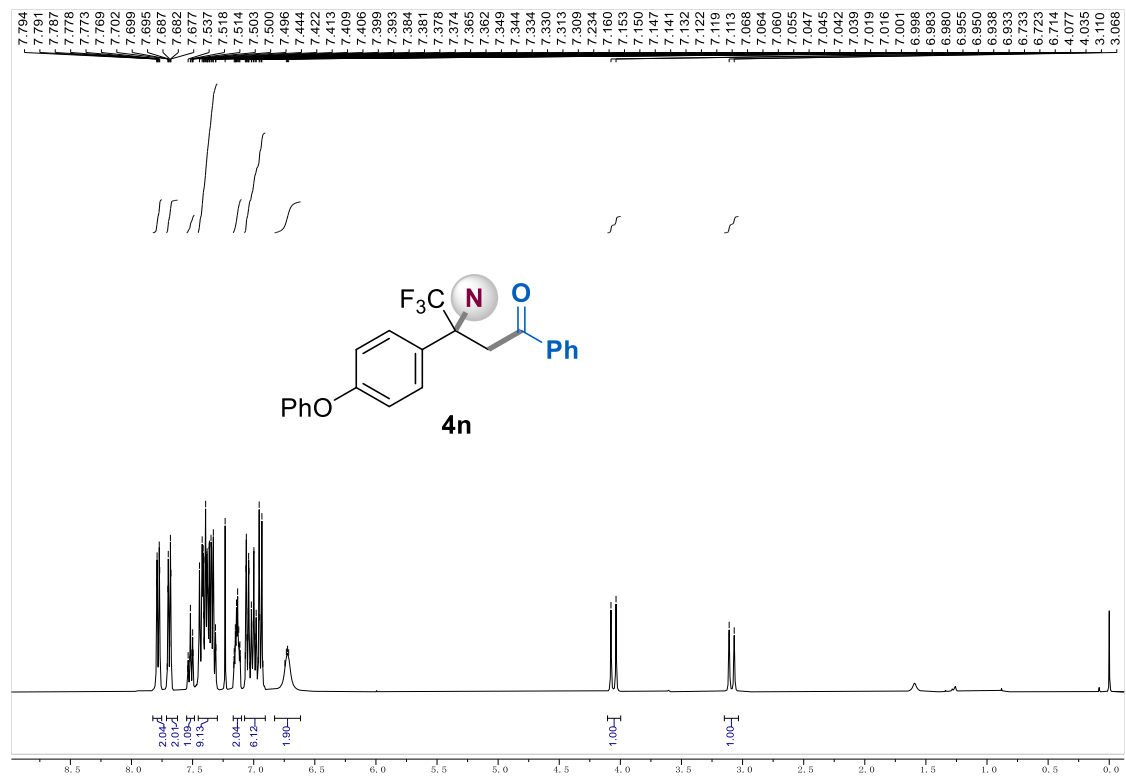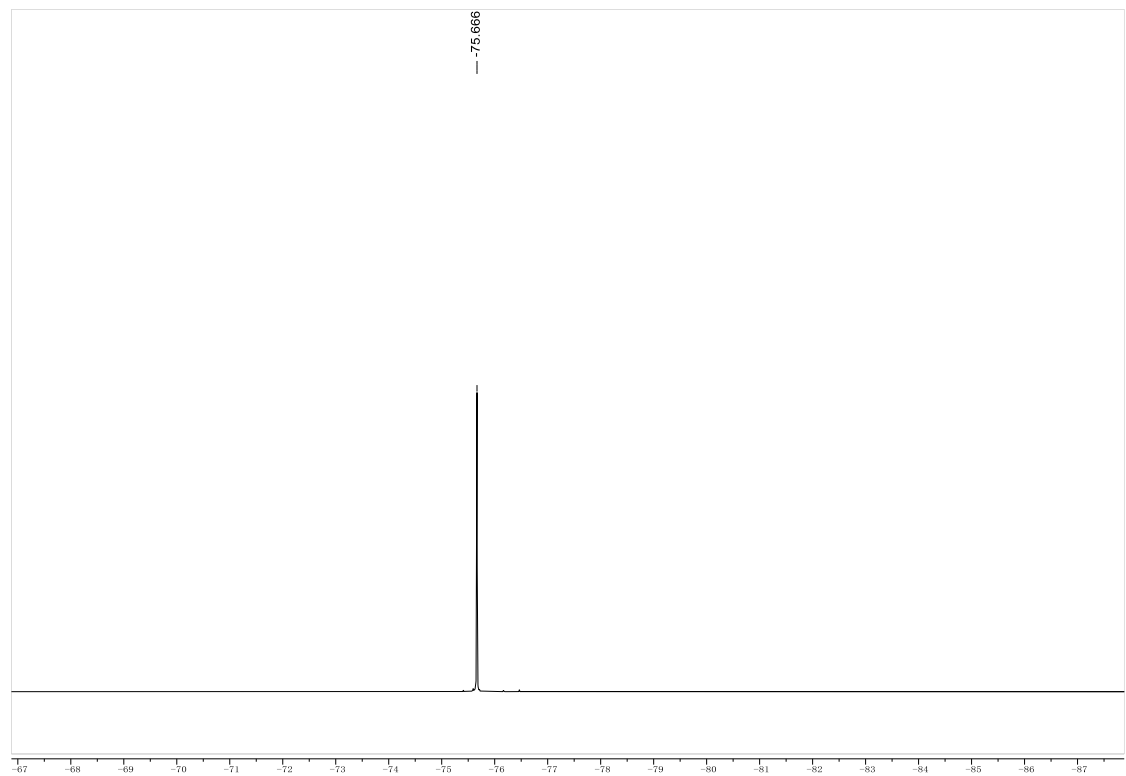

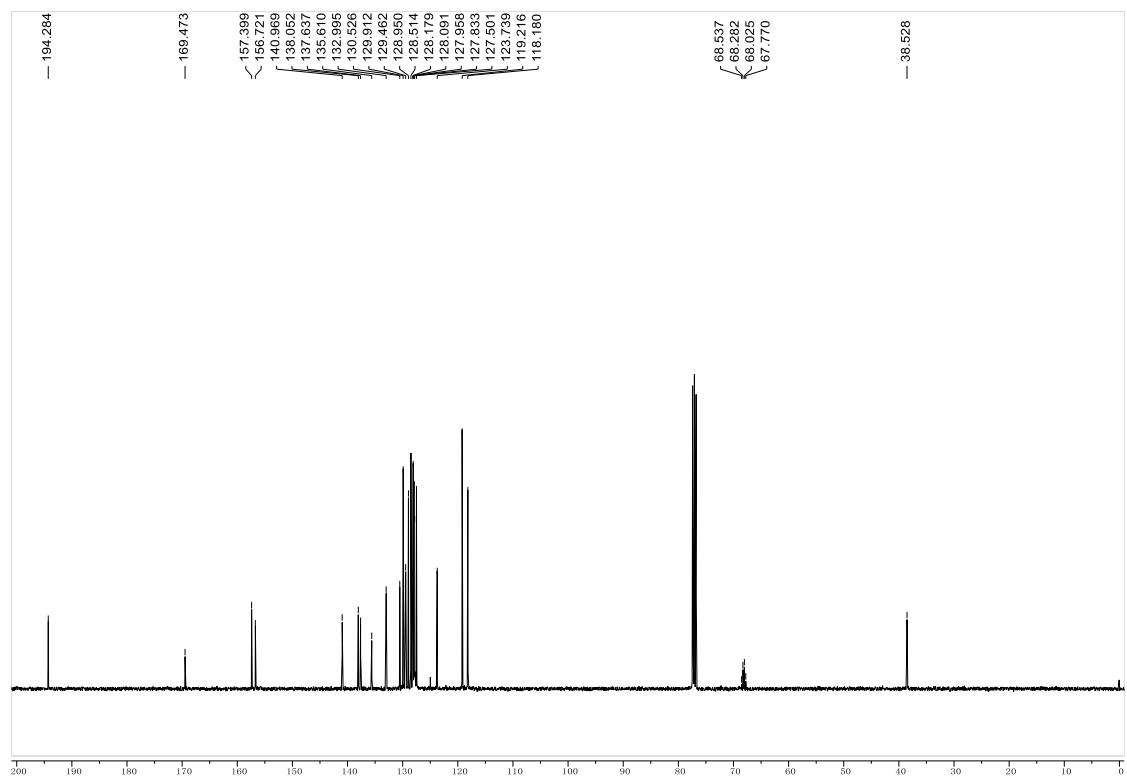

**<sup>1</sup>H NMR (400 MHz, CDCl<sub>3</sub>), <sup>19</sup>F NMR (375 MHz, CDCl<sub>3</sub>), <sup>13</sup>C NMR (100 MHz, CDCl<sub>3</sub>) spectrum of product 4o**

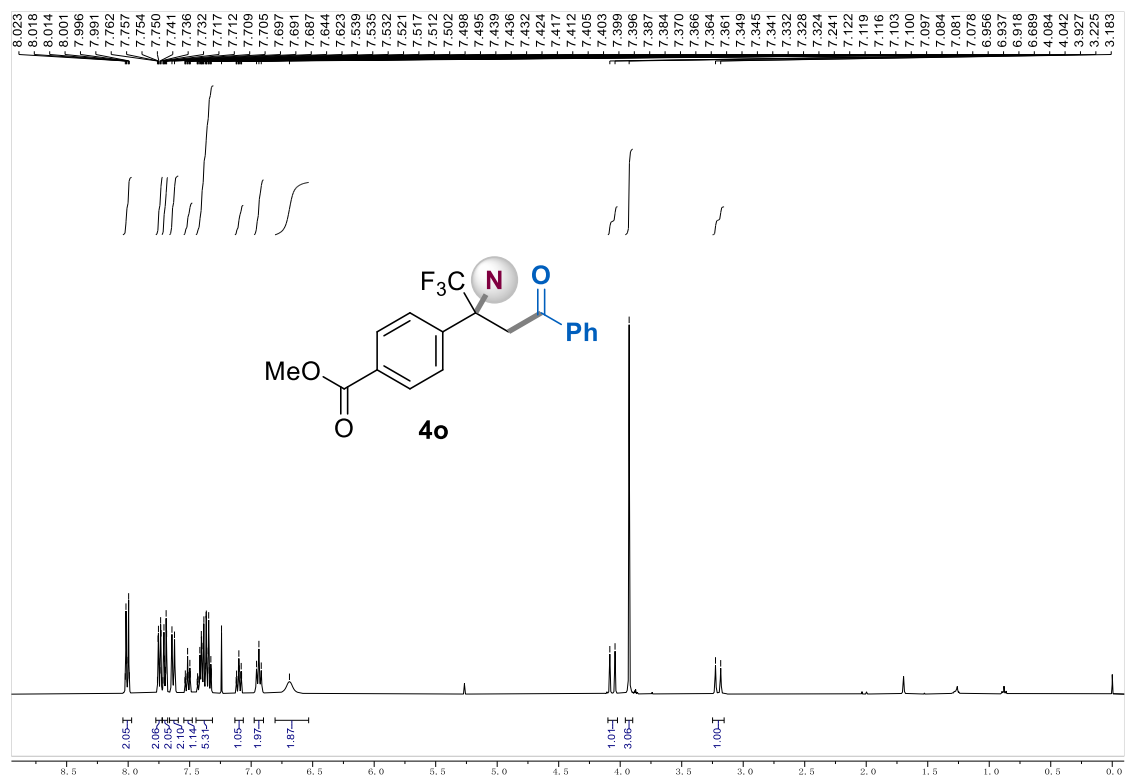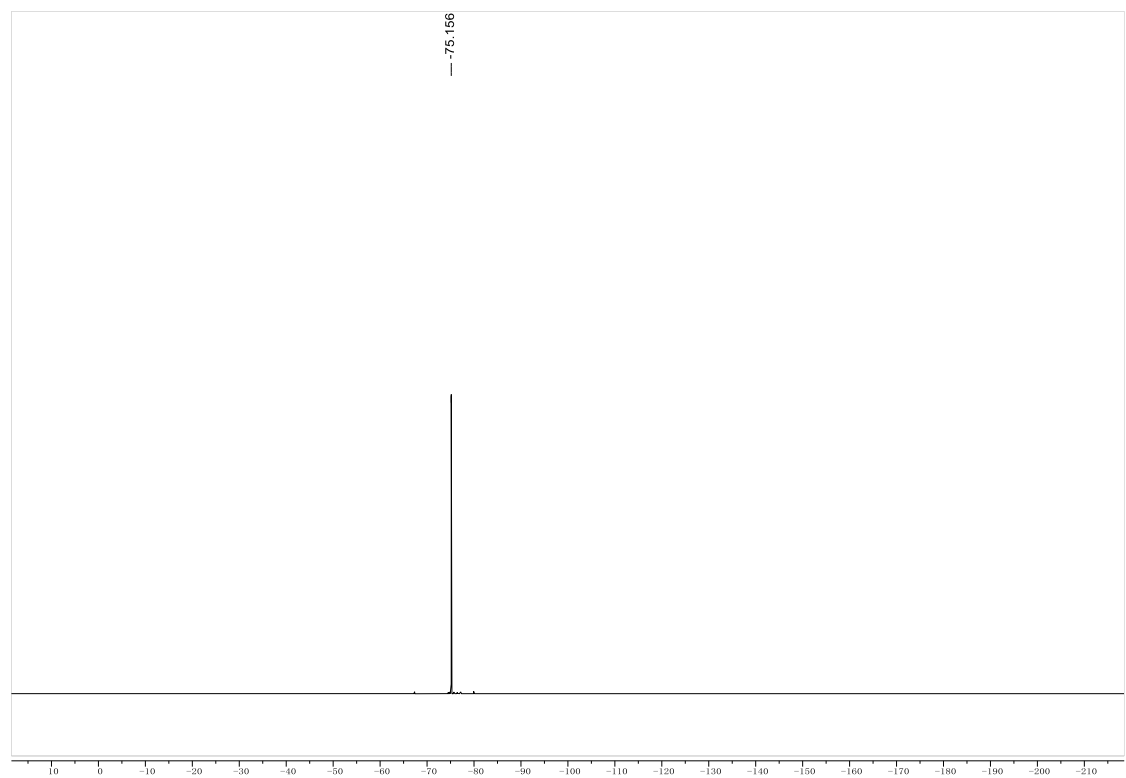



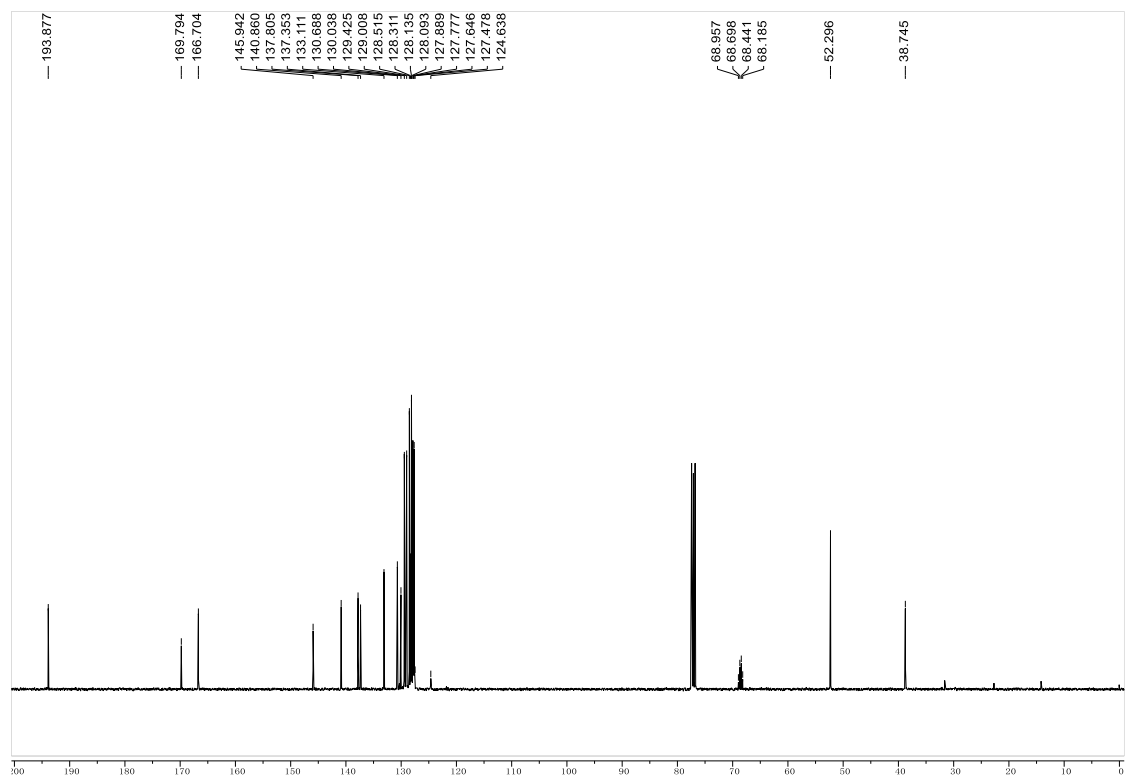

**<sup>1</sup>H NMR (400 MHz, CDCl<sub>3</sub>), <sup>19</sup>F NMR (375 MHz, CDCl<sub>3</sub>), <sup>13</sup>C NMR (100 MHz, CDCl<sub>3</sub>) spectrum of product 4p**

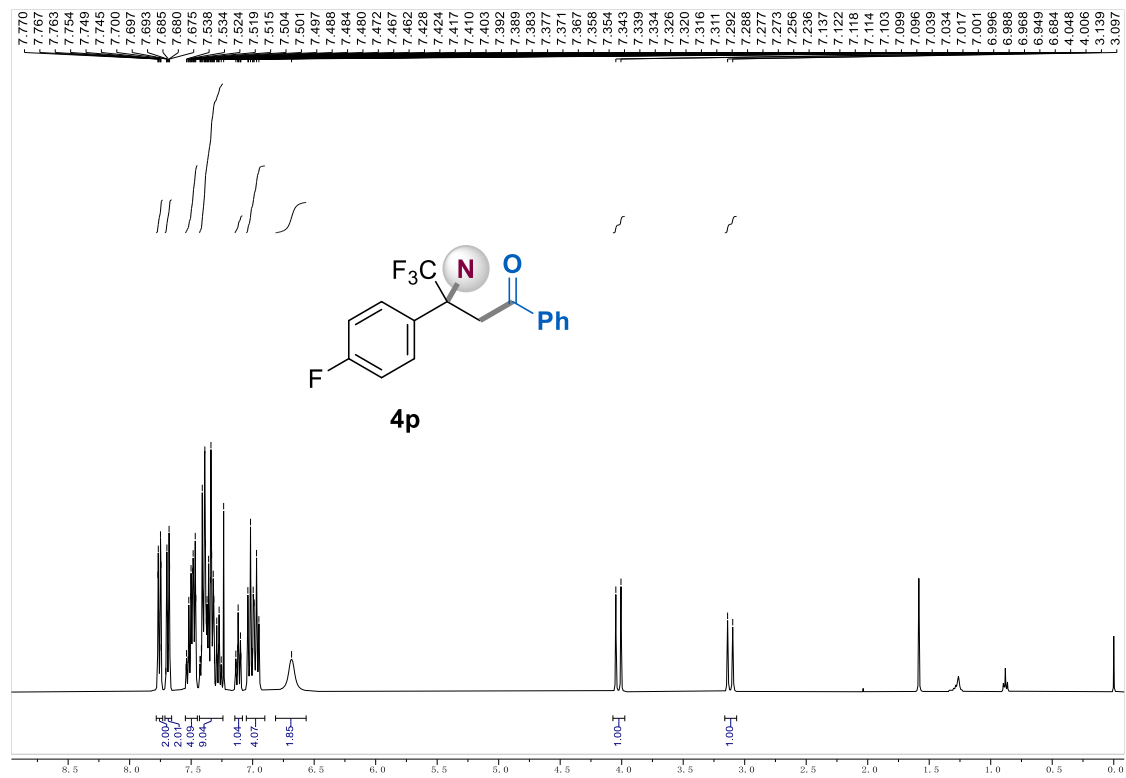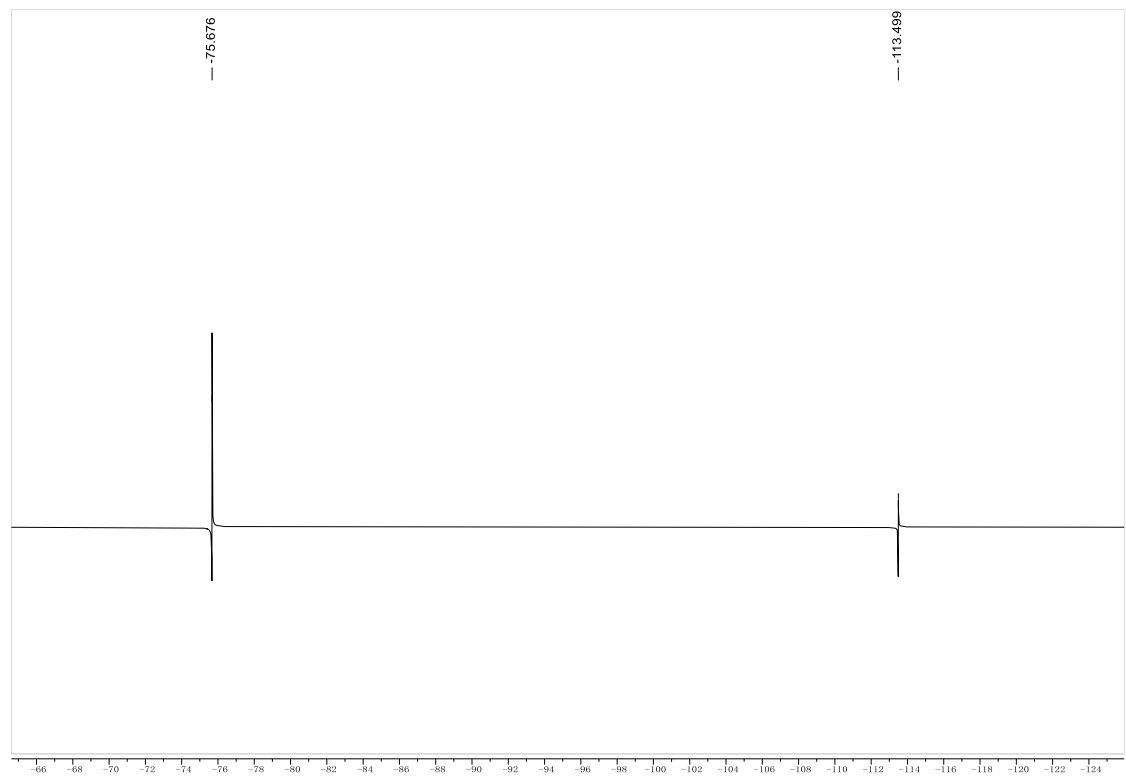

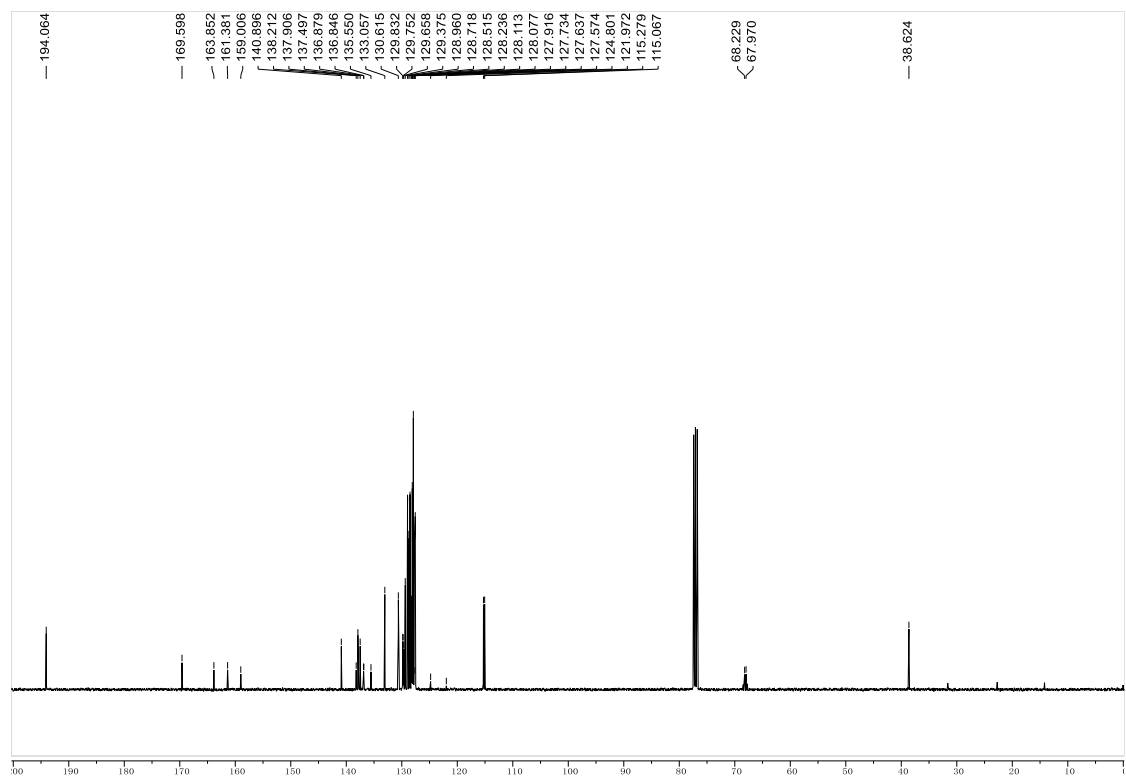

**<sup>1</sup>H NMR (400 MHz, CDCl<sub>3</sub>), <sup>19</sup>F NMR (375 MHz, CDCl<sub>3</sub>), <sup>13</sup>C NMR (100 MHz, CDCl<sub>3</sub>) spectrum of product 4q**

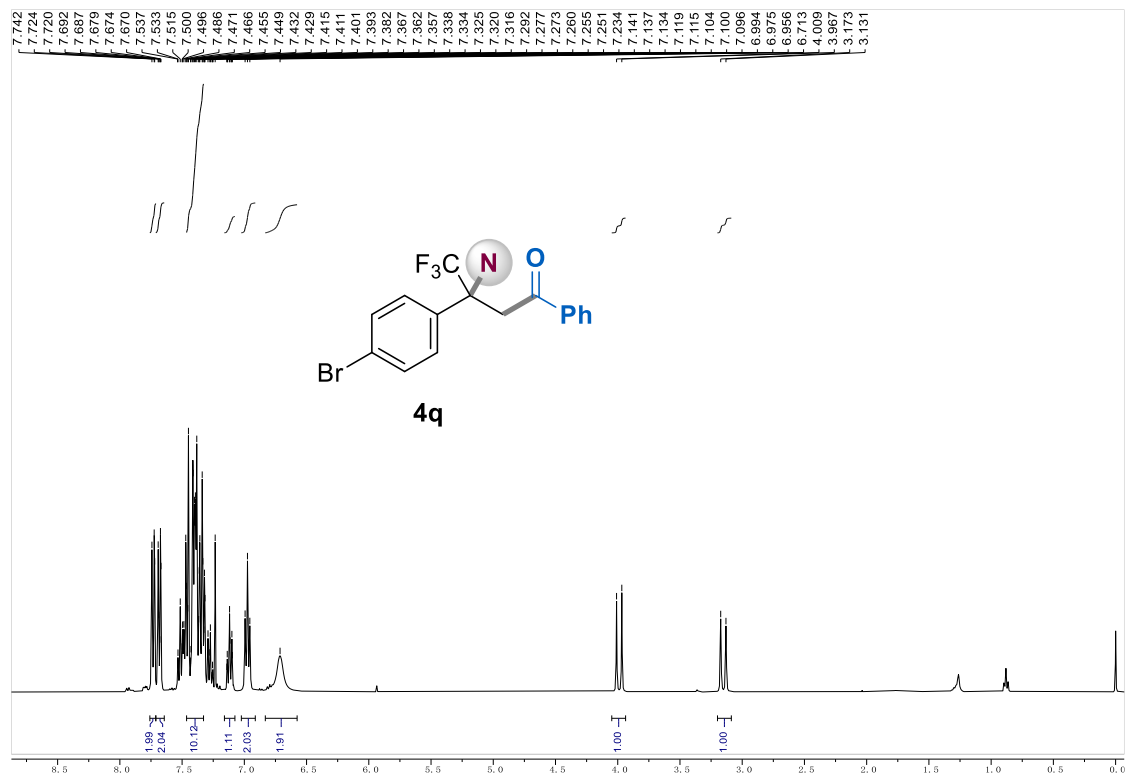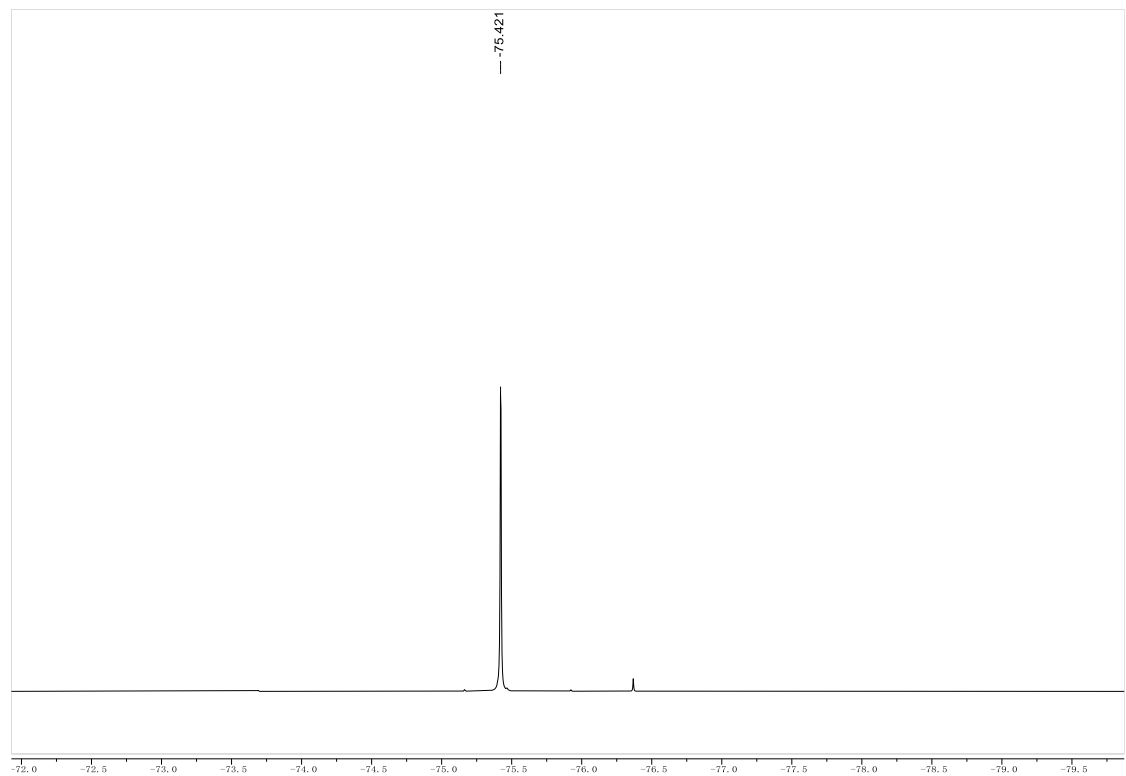

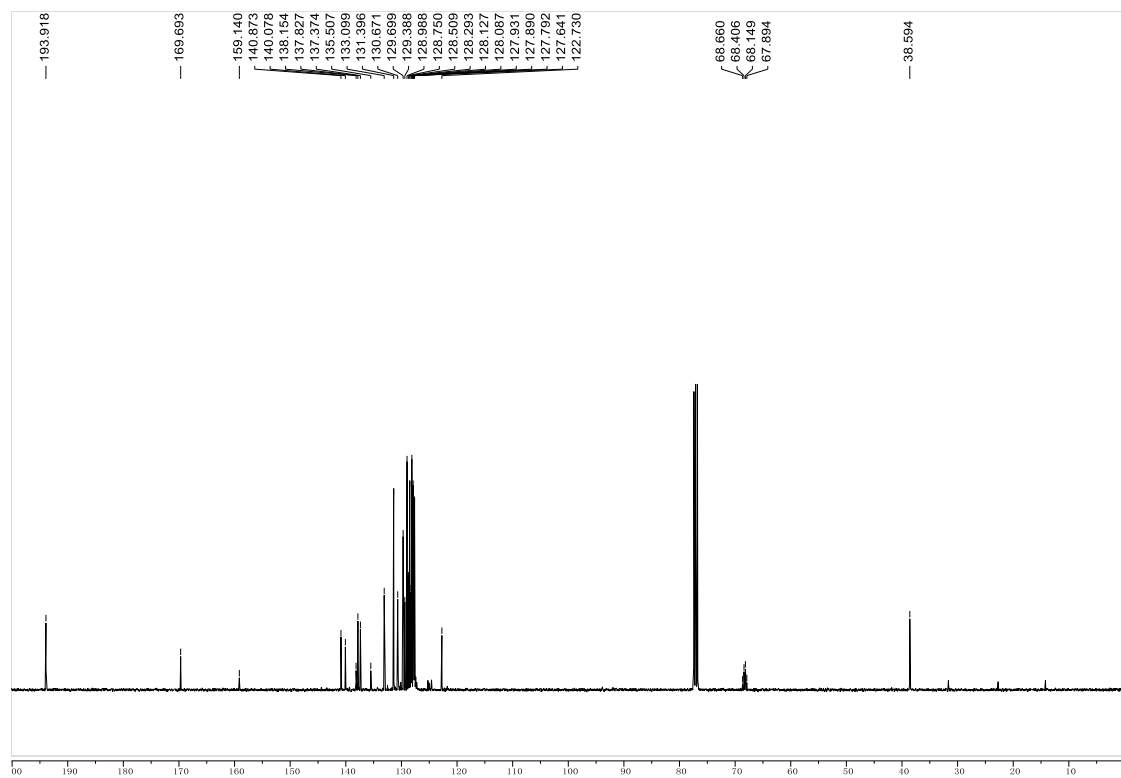

**<sup>1</sup>H NMR (400 MHz, CDCl<sub>3</sub>), <sup>19</sup>F NMR (375 MHz, CDCl<sub>3</sub>), <sup>13</sup>C NMR (100 MHz, CDCl<sub>3</sub>) spectrum of product 4r**

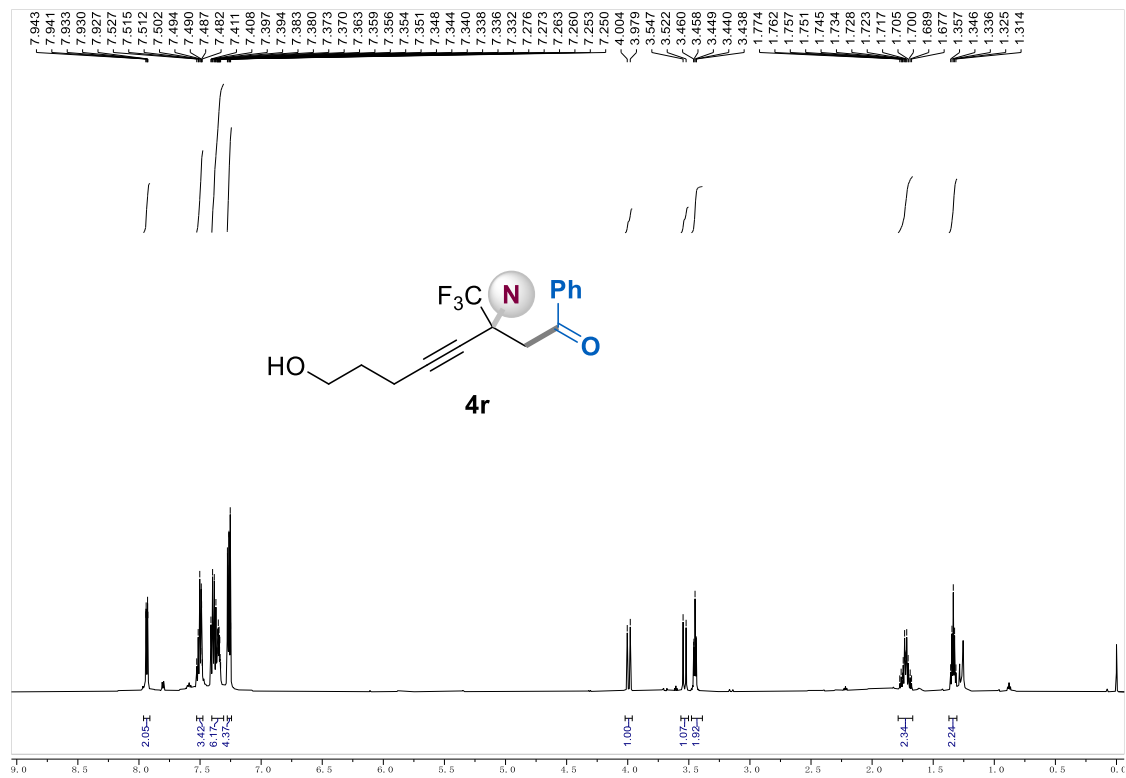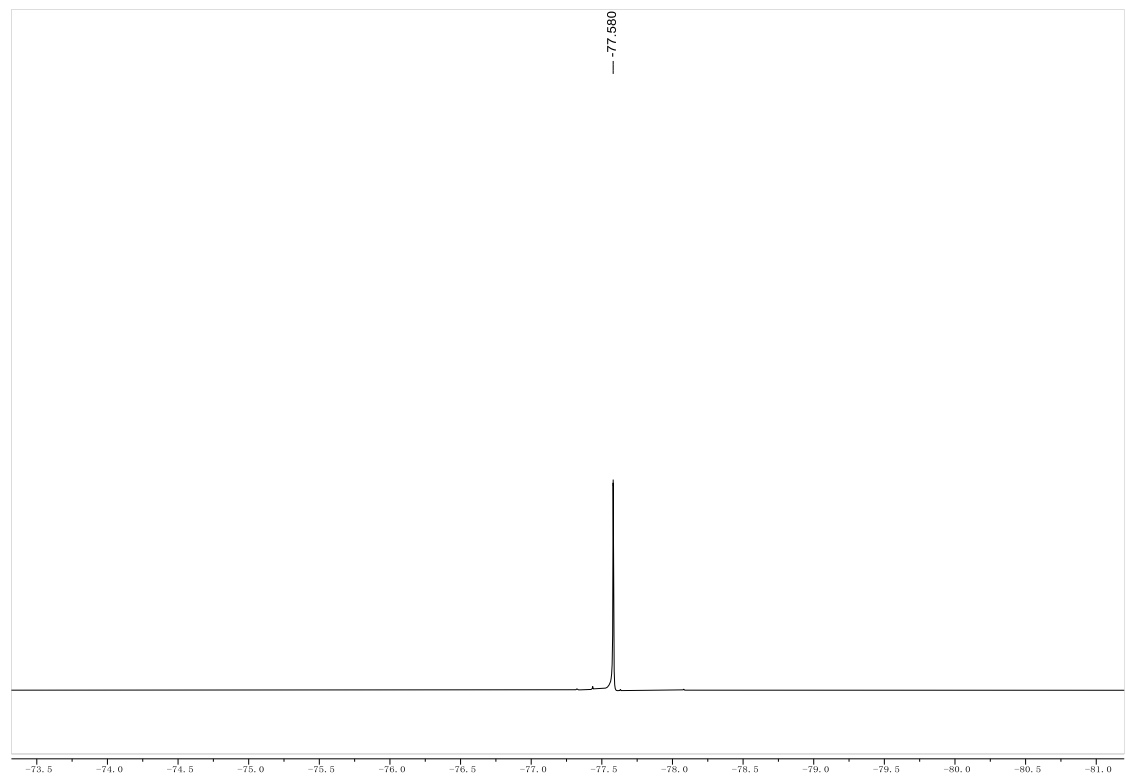

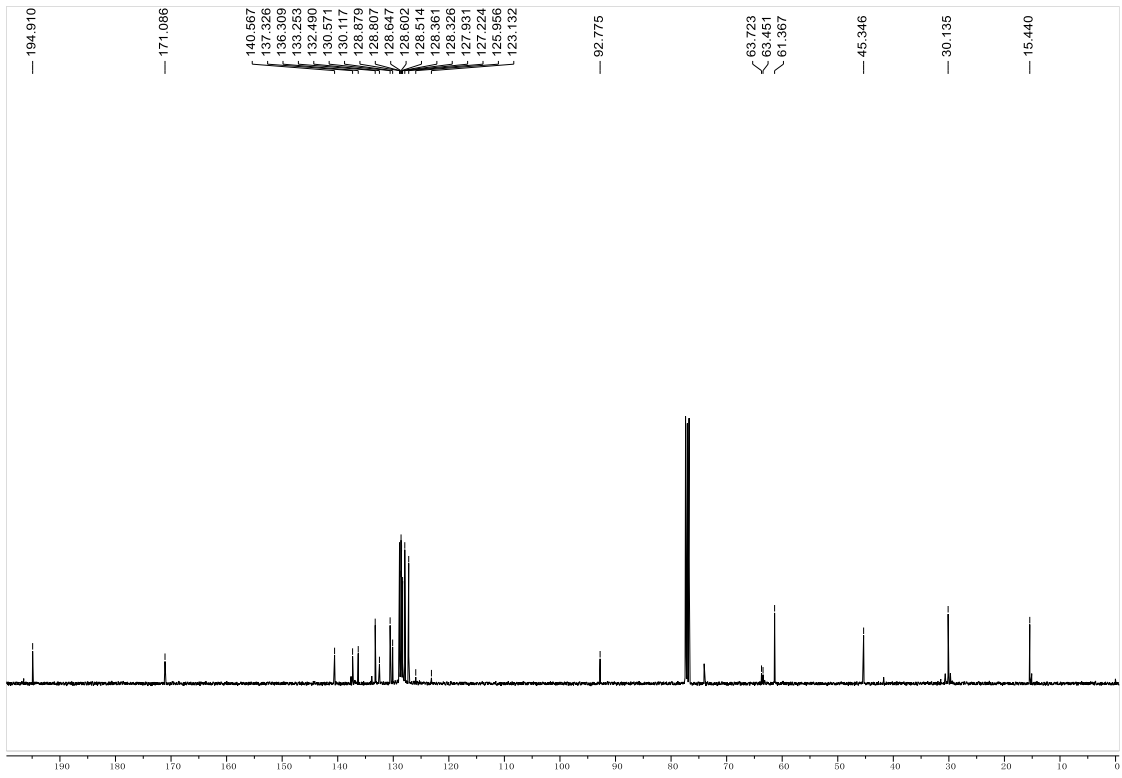

**<sup>1</sup>H NMR (600 MHz, CDCl<sub>3</sub>), <sup>19</sup>F NMR (565 MHz, CDCl<sub>3</sub>), <sup>13</sup>C NMR (150 MHz, CDCl<sub>3</sub>) spectrum of product 4s**

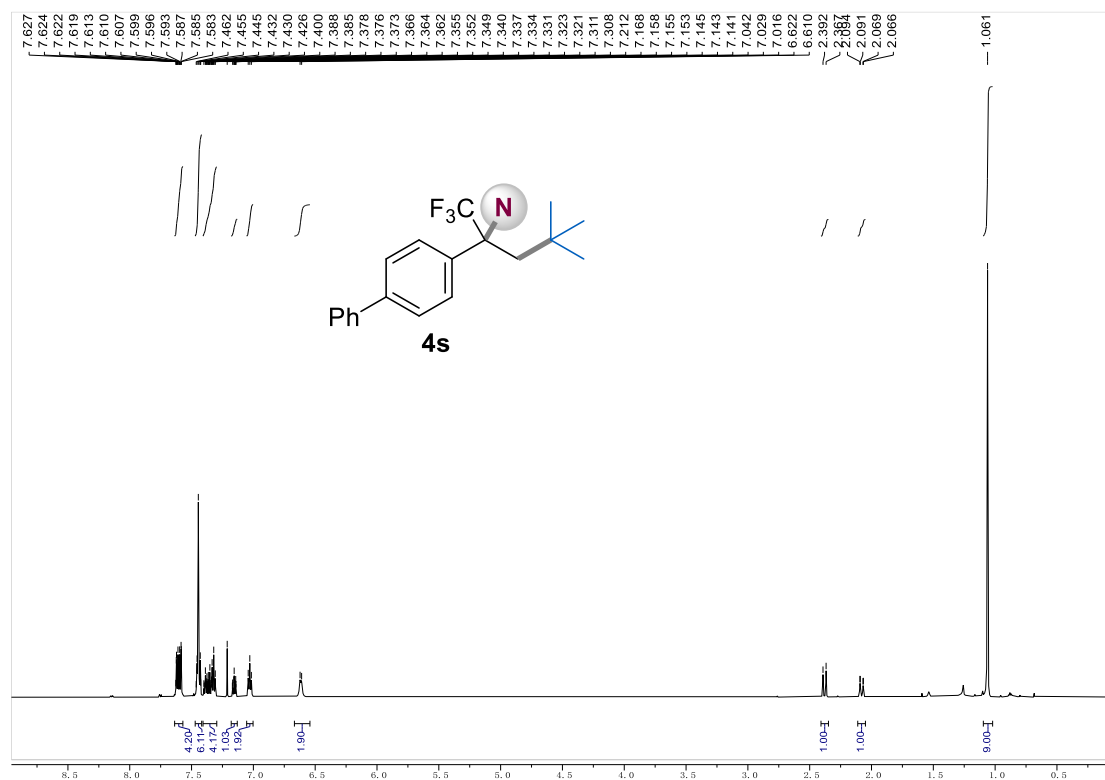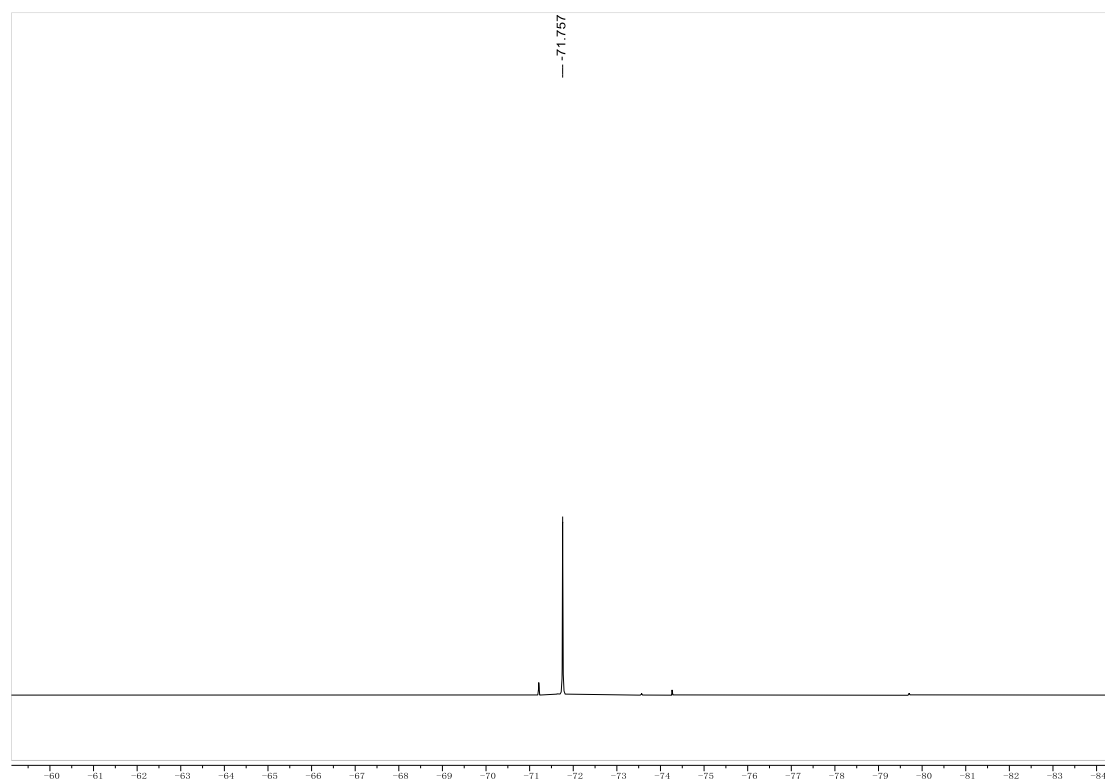



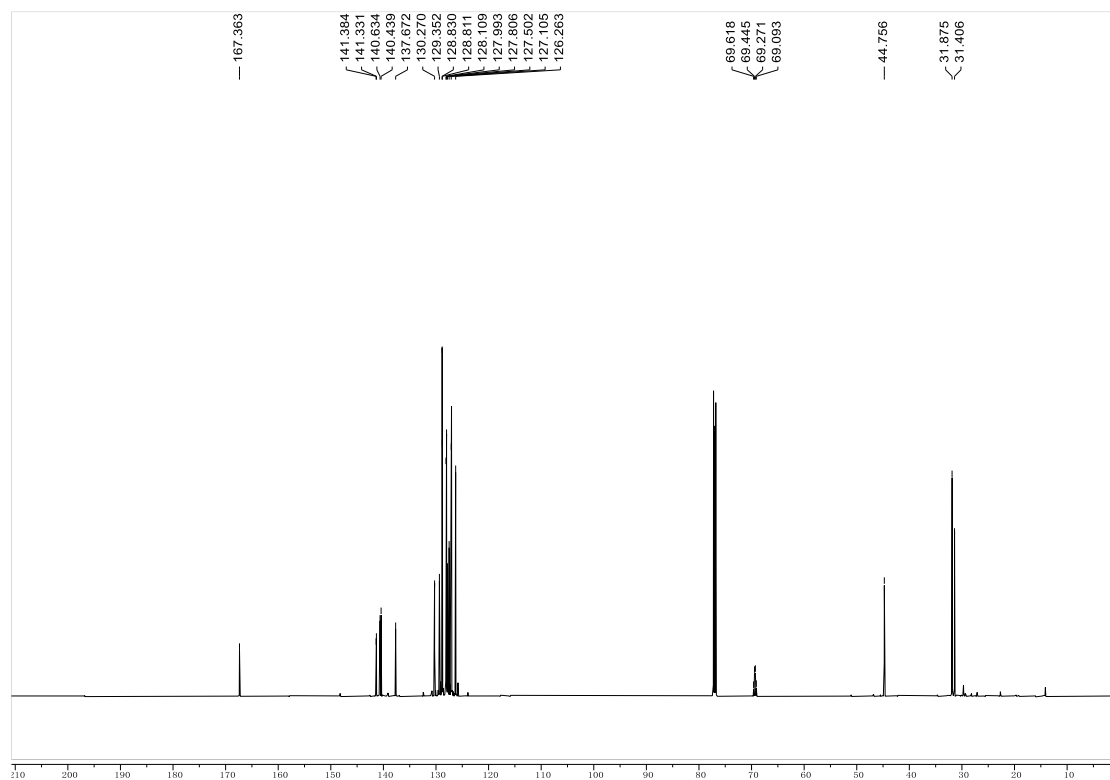

**<sup>1</sup>H NMR (400 MHz, CDCl<sub>3</sub>), <sup>19</sup>F NMR (375 MHz, CDCl<sub>3</sub>), <sup>13</sup>C NMR (100 MHz, CDCl<sub>3</sub>) spectrum of product 5**

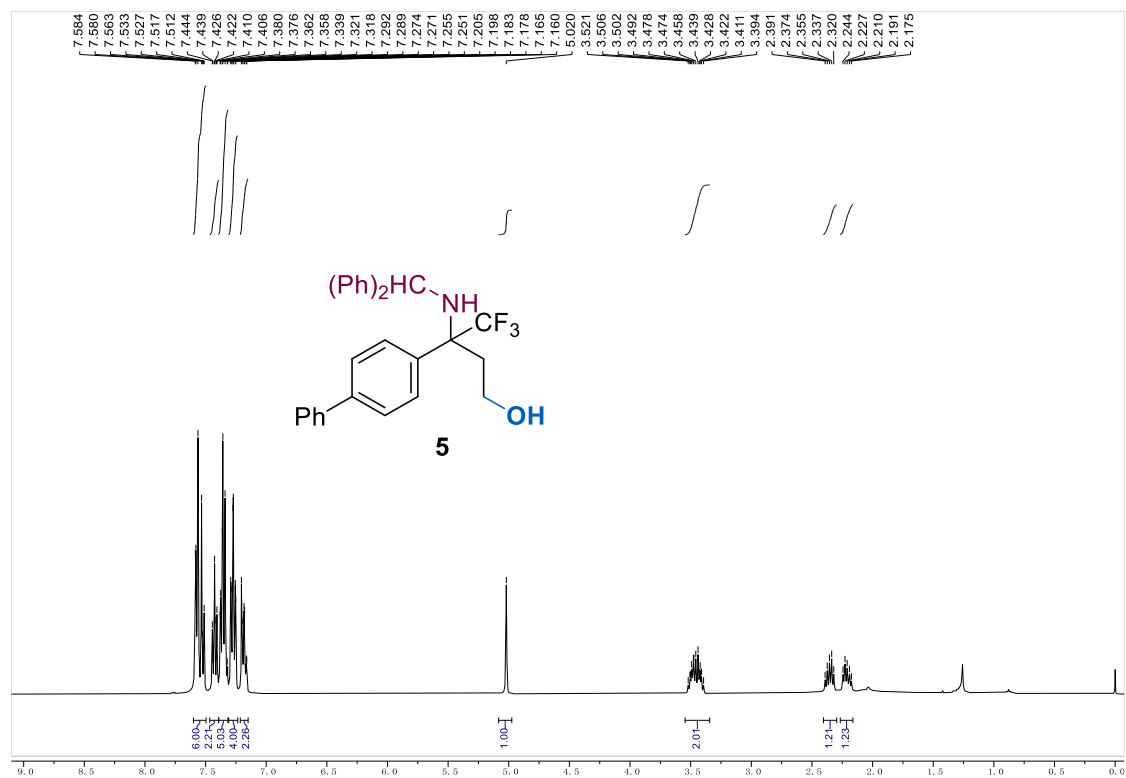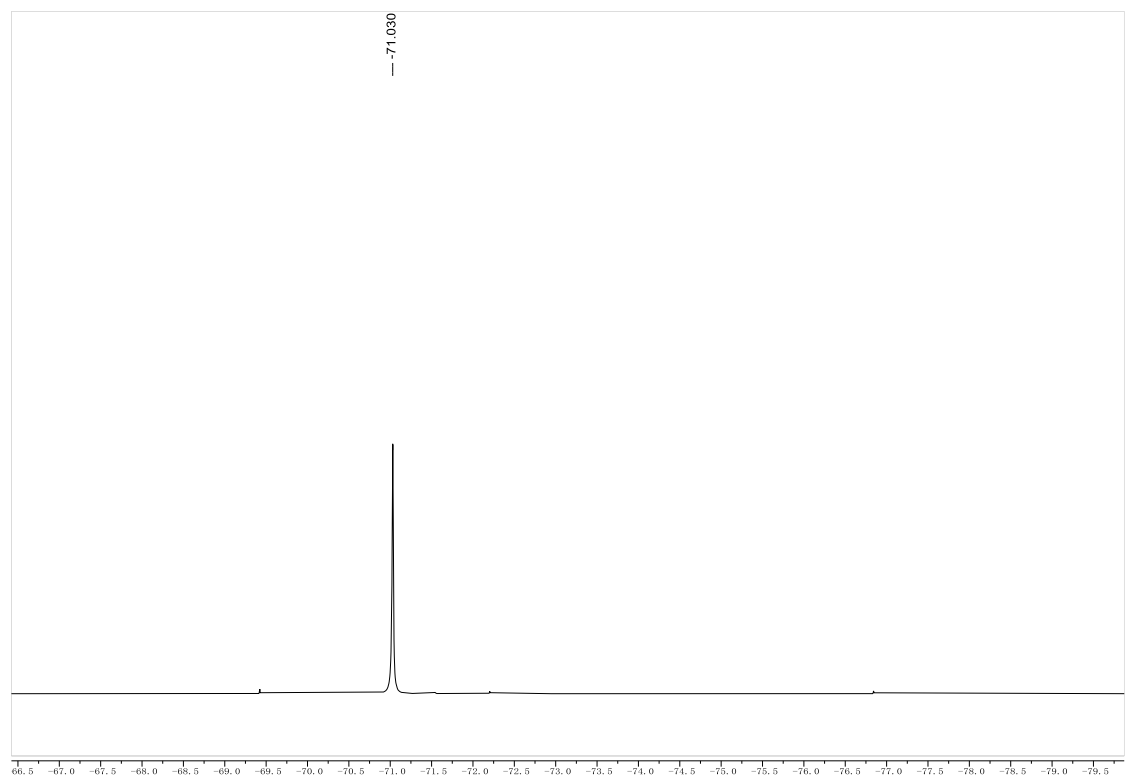

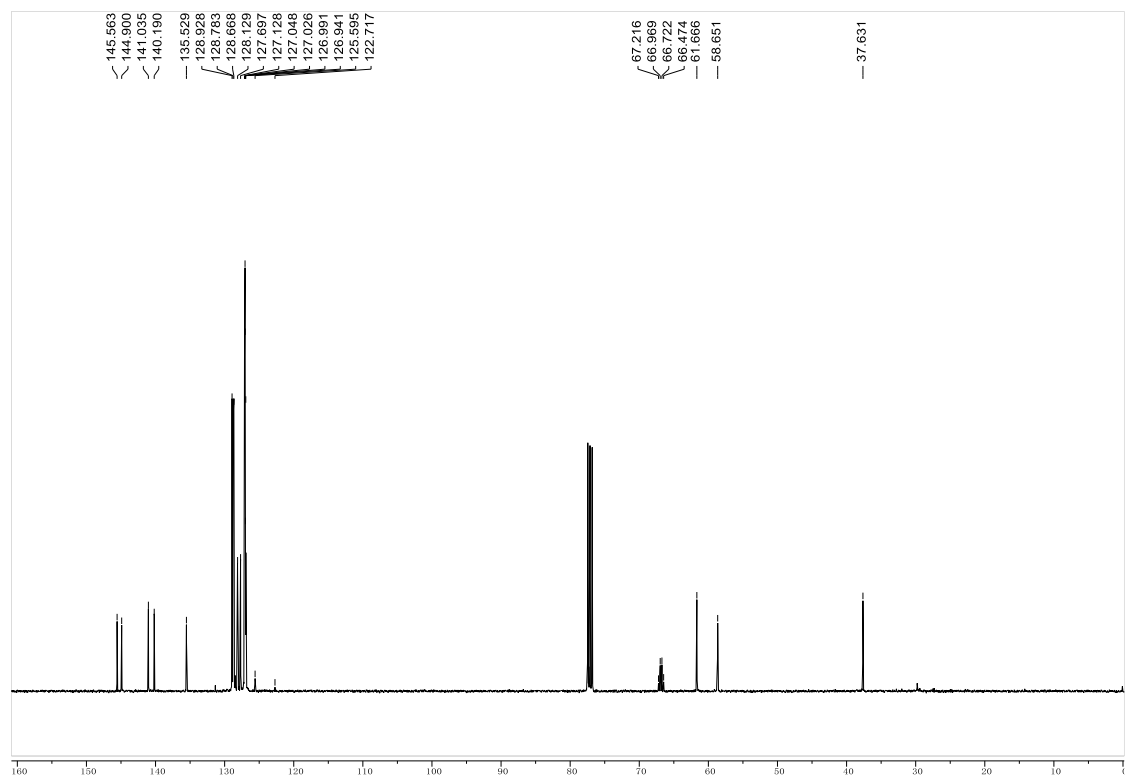

## X-ray crystallographic data of compound

X-Ray crystallographic analysis of **3g** (CCDC 2143808) showing the thermal ellipsoids at 30% probability level.

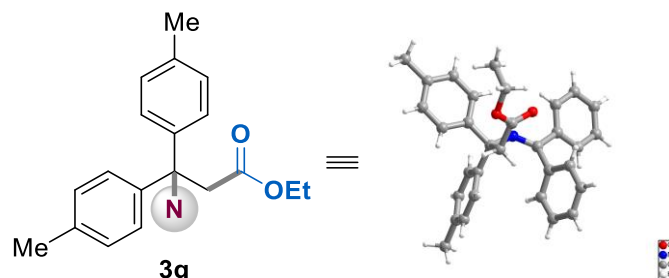

### checkCIF/PLATON report

Structure factors have been supplied for datablock(s) 20211221-xpj\_autoaaa

THIS REPORT IS FOR GUIDANCE ONLY. IF USED AS PART OF A REVIEW PROCEDURE FOR PUBLICATION, IT SHOULD NOT REPLACE THE EXPERTISE OF AN EXPERIENCED CRYSTALLOGRAPHIC REFEREE.

No syntax errors found. CIF dictionary Interpreting this report

### Datablock: 20211221-xpj\_autoaaa

Bond precision: C-C = 0.0034 Å Wavelength=0.71073  
Cell: a=10.3110(4) b=11.2258(5) c=12.8508(5)  
alpha=91.396(3) beta=99.313(3) gamma=117.296(4)  
Temperature: 293 K

|                        | Calculated   | Reported     |
|------------------------|--------------|--------------|
| Volume                 | 1296.15(11)  | 1296.15(10)  |
| Space group            | P -1         | P -1         |
| Hall group             | -P 1         | -P 1         |
| Moiety formula         | C32 H31 N O2 | C32 H31 N O2 |
| Sum formula            | C32 H31 N O2 | C32 H31 N O2 |
| Mr                     | 461.58       | 461.58       |
| Dx, g cm <sup>-3</sup> | 1.183        | 1.183        |
| Z                      | 2            | 2            |
| Mu (mm <sup>-1</sup> ) | 0.073        | 0.073        |
| F000                   | 492.0        | 492.0        |
| F000'                  | 492.20       |              |
| h, k, lmax             | 13, 14, 16   | 13, 14, 16   |
| Nref                   | 6188         | 5440         |
| Tmin, Tmax             |              | 0.723, 1.000 |
| Tmin'                  |              |              |

Correction method= # Reported T Limits: Tmin=0.723 Tmax=1.000  
AbsCorr = MULTI-SCAN

Data completeness= 0.879 Theta(max)= 27.873

R(reflections)= 0.0542( 4198) wR2(reflections)=  
0.1553( 5440)  
S = 1.061 Npar= 319

X-Ray crystallographic analysis of **3p** (CCDC 2143809) showing the thermal ellipsoids at 30% probability level.

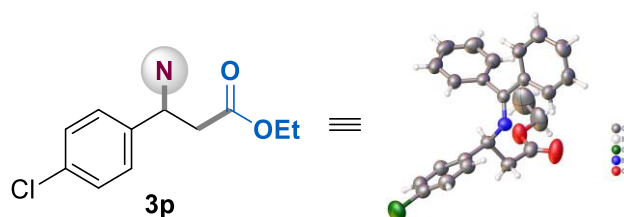

## checkCIF/PLATON report

Structure factors have been supplied for datablock(s) 20220108-xpj\_auto

THIS REPORT IS FOR GUIDANCE ONLY. IF USED AS PART OF A REVIEW PROCEDURE FOR PUBLICATION, IT SHOULD NOT REPLACE THE EXPERTISE OF AN EXPERIENCED CRYSTALLOGRAPHIC REFEREE.

No syntax errors found. CIF dictionary Interpreting this report

### Datablock: 20220108-xpj\_auto

|                 |                |                    |               |
|-----------------|----------------|--------------------|---------------|
| Bond precision: | C-C = 0.0033 A | Wavelength=0.71073 |               |
| Cell:           | a=9.2336 (4)   | b=20.3550 (6)      | c=22.5192 (7) |
|                 | alpha=90       | beta=90            | gamma=90      |
| Temperature:    | 293 K          |                    |               |

|                        | Calculated      | Reported        |
|------------------------|-----------------|-----------------|
| Volume                 | 4232.5 (3)      | 4232.5 (2)      |
| Space group            | P b c a         | P b c a         |
| Hall group             | -P 2ac 2ab      | -P 2ac 2ab      |
| Moiety formula         | C24 H22 Cl N O2 | C24 H22 Cl N O2 |
| Sum formula            | C24 H22 Cl N O2 | C24 H22 Cl N O2 |
| Mr                     | 391.88          | 391.87          |
| Dx, g cm <sup>-3</sup> | 1.230           | 1.230           |
| Z                      | 8               | 8               |
| Mu (mm <sup>-1</sup> ) | 0.199           | 0.199           |
| F000                   | 1648.0          | 1648.0          |
| F000'                  | 1649.83         |                 |
| h, k, lmax             | 12, 26, 29      | 12, 26, 27      |
| Nref                   | 5054            | 4380            |
| Tmin, Tmax             |                 | 0.520, 1.000    |
| Tmin'                  |                 |                 |

Correction method= # Reported T Limits: Tmin=0.520 Tmax=1.000  
AbsCorr = MULTI-SCAN

Data completeness= 0.867 Theta(max)= 27.900

|                                |                                  |
|--------------------------------|----------------------------------|
| R(reflections)= 0.0520 ( 3109) | wR2(reflections)= 0.1408 ( 4380) |
| S = 1.062                      | Npar= 254                        |

X-Ray crystallographic analysis of **31** (CCDC 214380) showing the thermal ellipsoids at 30% probability level.

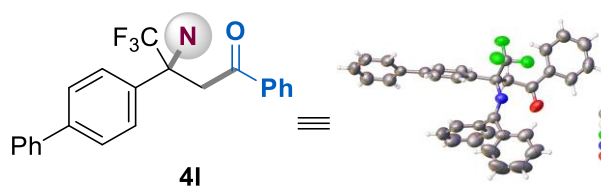

## checkCIF/PLATON report

Structure factors have been supplied for datablock(s) aaaa

THIS REPORT IS FOR GUIDANCE ONLY. IF USED AS PART OF A REVIEW PROCEDURE FOR PUBLICATION, IT SHOULD NOT REPLACE THE EXPERTISE OF AN EXPERIENCED CRYSTALLOGRAPHIC REFEREE.

No syntax errors found.    CIF dictionary    Interpreting this report

### Datablock: aaaa

|                 |                |                    |               |
|-----------------|----------------|--------------------|---------------|
| Bond precision: | C-C = 0.0069 A | Wavelength=0.71073 |               |
| Cell:           | a=12.1957 (6)  | b=14.1964 (6)      | c=16.4452 (8) |
|                 | alpha=90       | beta=94.807 (5)    | gamma=90      |
| Temperature:    | 293 K          |                    |               |

|                        | Calculated     | Reported       |
|------------------------|----------------|----------------|
| Volume                 | 2837.2 (2)     | 2837.2 (2)     |
| Space group            | P 21/n         | P 1 21/n 1     |
| Hall group             | -P 2yn         | -P 2yn         |
| Moiety formula         | C35 H26 F3 N O | C35 H26 F3 N O |
| Sum formula            | C35 H26 F3 N O | C35 H27 F3 N O |
| Mr                     | 533.57         | 534.57         |
| Dx, g cm <sup>-3</sup> | 1.249          | 1.251          |
| Z                      | 4              | 4              |
| Mu (mm <sup>-1</sup> ) | 0.088          | 0.088          |
| F000                   | 1112.0         | 1116.0         |
| F000'                  | 1112.58        |                |
| h, k, lmax             | 16, 18, 21     | 15, 18, 21     |
| Nref                   | 6774           | 5680           |
| Tmin, Tmax             |                | 0.619, 1.000   |
| Tmin'                  |                |                |

Correction method= # Reported T Limits: Tmin=0.619 Tmax=1.000  
AbsCorr = MULTI-SCAN

Data completeness= 0.839                      Theta(max)= 27.889

R(reflections)= 0.0780 ( 2929)

wR2(reflections)=  
0.3311 ( 5680)

S = 1.069

Npar= 361
